# Supplementary material for: Transcriptomic Changes of Piscirickettsia salmonis During Intracellular Growth in a Salmon Macrophage-Like Cell Line
Source: Front Cell Infect Microbiol. 2020 Jan 9;9:426. doi: 10.3389/fcimb.2019.00426 (PMC6964531; doi:10.3389/fcimb.2019.00426)
Supplement: Supplementary file 8 [file Table_3.xlsx]

## Sheet: Hoja1
Supplementary Table 3: Genes differentially expressed between P. salmonis growing inside SHK-1 cells and the bacteria exponentially growing in liquid cultures.
Locus TAG	Type	Coef (log2)	pvalueadj	GeneName	COG	COG Description	NR Description	KEGG	VFDB Description	Pfam	ProSite
PSLF89_2050	chromosome	8.48	0	RPOS	K	DNA-directed RNA polymerase sigma subunit (sigma70/sigma32)	RNA polymerase sigma factor RpoS	rpoS sigma S (sigma 38) factor of RNA polymerase, major sigma factor during stationary phase K03087 RNA polymerase nonessential primary-like sigma factor	(gi:54297202) rpoS (lpp1247) - RNA polymerase sigma factor RpoS [Legionella pneumophila str. Paris]	Winged helix-turn-helix DNA-binding domain	Sigma-70 factor, region 1.2;Sigma-70 region 2;Sigma-70, region 4;Sigma-70 region 3
PSLF89_1883	chromosome	8.15	0	--		--	hypothetical protein
PSLF89_1688	chromosome	7.46	0	--		--	hypothetical protein
PSLF89_3199	chromosome	7.35	0	--		--	hypothetical protein			HAD-like domain
PSLF89_1297	chromosome	7.13	0	--	S	Uncharacterized protein	hypothetical protein	hypothetical protein			Uncharacterized protein conserved in bacteria (DUF2272)
PSLF89_2433	chromosome	6.51	0	OMPA		--	hypothetical protein	transporter		Outer membrane protein/outer membrane enzyme PagP , beta-barrel	Outer membrane protein beta-barrel domain
PSLF89_1137	chromosome	6.41	0	--		--	hypothetical protein
PSLF89_2434	chromosome	6.39	0	OMPA		--	hypothetical protein	transporter		Outer membrane protein/outer membrane enzyme PagP , beta-barrel	Outer membrane protein beta-barrel domain
PSLF89_143	chromosome	6.39	0	PBPA	M	Membrane carboxypeptidase/penicillin-binding protein	hypothetical protein	ponA multimodular transpeptidase-transglycosylase PBP 1A K05366 penicillin-binding protein 1A [EC:2.4.1.- 3.4.-.-]		Beta-lactamase/transpeptidase-like	Penicillin binding protein transpeptidase domain;Transglycosylase
PSLF89_1868	chromosome	6.23	0	DOTF		--	hypothetical protein		(gi:52840697) icmG/dotF (lpg0452) - IcmG (DotF) [Legionella pneumophila str. Philadelphia 1]
PSLF89_1874	chromosome	6.21	0	ICMT		--	hypothetical protein	icmT IcmT protein K12222 intracellular multiplication protein IcmT	(gi:52840686) icmT (lpg0441) - IcmT [Legionella pneumophila str. Philadelphia 1]
PSLF89_3p12	pPSLF89-3	6.13	0	--		--	hypothetical protein	hypothetical protein			Protein of unknown function (DUF4035)
PSLF89_08950	pPSLF89-4	6.08	0	--	X	Transposase and inactivated derivatives IS5 family	transposase (plasmid)	transposase			Transposase DDE domain
PSLF89_1873	chromosome	6.07	0	DOTB	NW	Tfp pilus assembly protein PilT pilus retraction ATPase	ATPase	dotB defect in organelle trafficking protein DotB (ATPase) K12203 defect in organelle trafficking protein DotB	(gi:54295516) dotB (lpl2603) - defect in organelle trafficking protein DotB (ATPase) [Legionella pneumophila str. Lens]		Type II/IV secretion system protein
PSLF89_04165	chromosome	6.03	0	PSEUDO		PSEUDO	PSEUDO
PSLF89_1870	chromosome	6.01	0	--		--	hypothetical protein
PSLF89_1057	chromosome	5.95	0	--		--	hypothetical protein
PSLF89_2083	chromosome	5.93	0	BCRH	G	Predicted arabinose efflux permease MFS family	Bcr/CflA family drug resistance efflux transporter	drug resistance transporter, Bcr/CflA subfamily protein			Major Facilitator Superfamily
PSLF89_1281	chromosome	5.82	0	ICMV		--	hypothetical protein
PSLF89_1871	chromosome	5.81	0	DOTD		--	hypothetical protein	dotD DotD K12205 defect in organelle trafficking protein DotD	(gi:52842880) dotD (lpg2674) - DotD [Legionella pneumophila str. Philadelphia 1]
PSLF89_1150	chromosome	5.78	0	--		--	hypothetical protein
PSLF89_2716	chromosome	5.78	0		R	Secreted protein containing bacterial Ig-like domain and vWFA domain	hypothetical protein			von Willebrand factor, type A	von Willebrand factor type A domain
PSLF89_1880	chromosome	5.76	0	DOTO	U	Type IV secretory pathway VirB4 component	hypothetical protein	icmB_dotO hypothetical protein K12206 intracellular multiplication protein IcmB	(gi:54293449) icmB/dotO (lpl0498) - hypothetical protein [Legionella pneumophila str. Lens]		AAA-like domain
PSLF89_1875	chromosome	5.7	0	ICMO	U	Type IV secretory pathway VirD4 component TraG/TraD family ATPase	hypothetical protein	icmO IcmO K12217 intracellular multiplication protein IcmO	(gi:148360937) icmO/dotL (LPC_2897) - IcmO (DotL) [Legionella pneumophila str. Corby]		AAA-like domain
PSLF89_1673	chromosome	5.51	0	LETS	T	Bacteriophytochrome (light-regulated signal transduction histidine kinase)	hypothetical protein	Hpt sensor hybrid histidine kinase K07678 two-component system, NarL family, sensor histidine kinase BarA [EC:2.7.13.3]	(gi:70731797) gacS (PFL_4451) - sensor protein GacS [Pseudomonas fluorescens str. Pf-5]	Signal transduction histidine kinase EnvZ-like, dimerisation/phosphoacceptor domain	Hpt domain;Response regulator receiver domain;Histidine kinase-, DNA gyrase B-, and HSP90-like ATPase;His Kinase A (phospho-acceptor) domain;HAMP domain;Uncharacterized signal transduction histidine kinase domain (DUF2222)
PSLF89_1881	chromosome	5.49	0	--		--	hypothetical protein
PSLF89_1872	chromosome	5.42	0	DOTC	M	LysM repeat	dotC-like type IV secretion system protein	dotC defect in organelle trafficking lipoprotein DotC K12204 defect in organelle trafficking protein DotC	(gi:54298665) dotC (lpp2729) - defect in organelle trafficking lipoprotein DotC [Legionella pneumophila str. Paris]
PSLF89_1885	chromosome	5.25	0	--		--	hypothetical protein
PSLF89_1p169	pPSLF89-1	5.25	0	PLD	I	Phosphatidylserine/phosphatidylglycerophosphate/cardiolipin synthase or related enzyme	PLD-like domain protein	phospholipase (EC:3.1.4.-)	(gi:294502057) ymt (YPZ3_pMT0065) - murine toxin [Yersinia pestis str. Z176003 plasmid pMT1]		PLD-like domain
PSLF89_2755	chromosome	5.23	0	--		--	hypothetical protein
PSLF89_05945	chromosome	5.22	0	T801		Integrase	IS91 family transposase	transposase, IS91 family			Putative transposase;Transposase zinc-binding domain
PSLF89_1754	chromosome	5.21	0	BCR	G	Predicted arabinose efflux permease MFS family	Bcr/CflA family drug resistance efflux transporter	bicyclomycin/multidrug efflux system K07552 MFS transporter, DHA1 family, bicyclomycin/chloramphenicol resistance protein			Major Facilitator Superfamily
PSLF89_1876	chromosome	5.14	0	--		--	hypothetical protein
PSLF89_639	chromosome	5.11	0	--		Uncharacterized protein involved in outer membrane biogenesis	asmA-like family protein				AsmA-like C-terminal region
PSLF89_03585	chromosome	5.1	0	--		--	hypothetical protein
PSLF89_1293	chromosome	5.07	0	--		--	pentapeptide repeats family protein
PSLF89_1p159	pPSLF89-1	5.01	0	--		Transposase (or an inactivated derivative)	hypothetical protein	hypothetical protein			Protein of unknown function (DUF1561)
PSLF89_1295	chromosome	4.99	0	--		--	hypothetical protein
PSLF89_1276	chromosome	4.94	0	--		--	hypothetical protein
PSLF89_1879	chromosome	4.93	0	ICMW		--	hypothetical protein
PSLF89_1054	chromosome	4.89	0.017	--		--	hypothetical protein				Protein kinase domain
PSLF89_2250	chromosome	4.84	0	NUCA	F	DNA/RNA endonuclease G NUC1	hypothetical protein	endonuclease K01173 endonuclease G, mitochondrial		Extracellular Endonuclease, subunit A	DNA/RNA non-specific endonuclease
PSLF89_287	chromosome	4.84	0	PBPB	M	Membrane carboxypeptidase (penicillin-binding protein)	penicillin-binding protein 1B			Beta-lactamase/transpeptidase-like	Transglycosylase;Penicillin binding protein transpeptidase domain;Bifunctional transglycosylase second domain
PSLF89_1882	chromosome	4.81	0	DOTA	GER	Permease of the drug/metabolite transporter (DMT) superfamily	hypothetical protein	dotA DotA K12202 defect in organelle trafficking protein DotA	(gi:148358578) dotA (LPC_0450) - defect in organelle trafficking protein DotA [Legionella pneumophila str. Corby]
PSLF89_1p72	pPSLF89-1	4.79	0	--		--	hypothetical protein
PSLF89_1284	chromosome	4.77	0	--		--	hypothetical protein
PSLF89_2485	chromosome	4.76	0	KEFB	S	Uncharacterized conserved protein contains PhoU and TrkA_C domains	sodium:proton exchanger	potassium efflux system protein K03455 monovalent cation:H+ antiporter-2, CPA2 family		NAD(P)-binding domain	TrkA-N domain;Sodium/hydrogen exchanger family;TrkA-C domain
PSLF89_1878	chromosome	4.7	0	DOTN	V	5-methylcytosine-specific restriction endonuclease McrA	hypothetical protein	icmJ_dotN hypothetical protein K12212 intracellular multiplication protein IcmJ	(gi:54296490) icmJ/dotN (lpp0521) - hypothetical protein [Legionella pneumophila str. Paris]
PSLF89_2757	chromosome	4.67	0	--		--	hypothetical protein				Domain of unknown function (DUF4325)
PSLF89_1185	chromosome	4.66	0	--	O	Cysteine protease C1A family	hypothetical protein PSLF89_1185	hypothetical protein
PSLF89_1867	chromosome	4.66	0	ICME	U	Type IV secretory pathway VirB10 components	hypothetical protein	icmE hypothetical protein K12209 intracellular multiplication protein IcmE	(gi:148360932) icmE/dotG (LPC_2892) - IcmE (DotG) [Legionella pneumophila str. Corby]		Bacterial conjugation TrbI-like protein
PSLF89_569	chromosome	4.64	0	--		Serine/threonine protein kinase	hypothetical protein				Protein kinase domain
PSLF89_1869	chromosome	4.58	0	ICMC		--	hypothetical protein
PSLF89_05390	chromosome	4.45	0	--		--	hypothetical protein	icmV intracellular multiplication protein IcmV K12223 intracellular multiplication protein IcmV	(gi:54295527) icmV (lpl2614) - intracellular multiplication protein IcmV [Legionella pneumophila str. Lens]
PSLF89_1890	chromosome	4.44	0	--		--	hypothetical protein
PSLF89_1p14	pPSLF89-1	4.41	0	--		--	hypothetical protein	hypothetical protein			Protein of unknown function (DUF1561)
PSLF89_2022	chromosome	4.39	0	--		--	hypothetical protein
PSLF89_1866	chromosome	4.38	0	DOTH		--	hypothetical protein	icmK hypothetical protein K12213 intracellular multiplication protein IcmK	(gi:54296485) icmK/dotH (lpp0516) - hypothetical protein [Legionella pneumophila str. Paris]		Protein of unknown function (DUF3625)
PSLF89_1884	chromosome	4.38	0	DOTI		--	hypothetical protein	dotI hypothetical protein K12214 intracellular multiplication protein IcmL	(gi:52840694) icmL/dotI (lpg0449) - IcmL (DotI) [Legionella pneumophila str. Philadelphia 1]		Macrophage killing protein with similarity to conjugation protein
PSLF89_2493	chromosome	4.36	0	--	S	Uncharacterized protein YjbI contains pentapeptide repeats	hypothetical protein	pentapeptide repeat-containing protein			Pentapeptide repeats (8 copies)
PSLF89_1379	chromosome	4.31	0.017	--		--	hypothetical protein
PSLF89_03475	chromosome	4.3	0	--		--	hypothetical protein
PSLF89_1525	chromosome	4.23	0	--		--	hypothetical protein
PSLF89_2472	chromosome	4.23	0	--		--	hypothetical protein
PSLF89_1351	chromosome	4.19	0.014	--		--	hypothetical protein
PSLF89_1448	chromosome	4.12	0	--		--	hypothetical protein
PSLF89_08460	pPSLF89-1	4.09	0	--	X	Transposase and inactivated derivatives	hypothetical protein PSLF89_08460 (plasmid)			Winged helix-turn-helix DNA-binding domain	Helix-turn-helix domain
PSLF89_1p151	pPSLF89-1	4.06	0	--		--	hypothetical protein				Protein of unknown function (DUF1561)
PSLF89_1877	chromosome	4.05	0	DOTM		--	hypothetical protein K661_00740	IcmP (DotM) protein K12218 intracellular multiplication protein IcmP	(gi:54293438) icmP/dotM (lpl0487) - hypothetical protein [Legionella pneumophila str. Lens]
PSLF89_2833	chromosome	4.01	0	--		--	hypothetical protein
PSLF89_2203	chromosome	3.96	0	KEFC	P	Voltage-gated potassium channel Kch	sodium:proton exchanger	kefB putative glutathione-regulated potassium-efflux system protein K03455 monovalent cation:H+ antiporter-2, CPA2 family		NAD(P)-binding domain	Sodium/hydrogen exchanger family;TrkA-N domain
PSLF89_1456	chromosome	3.96	0	XAD	MR	L-alanine-DL-glutamate epimerase or related enzyme of enolase superfamily	MR-MLE family protein	MR-MLE family protein			Enolase C-terminal domain-like;Mandelate racemase / muconate lactonizing enzyme, N-terminal domain
PSLF89_2108	chromosome	3.85	0.013	MLTD	M	LysM repeat	lytic transglycosylase		(gi:16802625) iap/cwhA (lmo0582) - P60 extracellular protein, invasion associated protein Iap [Listeria monocytogenes str. EGD-e (serovar 1/2a)]		LysM domain;LysM domain;LysM domain;LysM domain;LysM domain;Transglycosylase SLT domain
PSLF89_1423	chromosome	3.8	0.012	--		--	hypothetical protein
PSLF89_1796	chromosome	3.8	0	Y1319	R	Na+-dependent transporter SNF family	neurotransmitter symporter family protein	SNF family Na+-dependent transporter K03308 neurotransmitter:Na+ symporter, NSS family			Sodium:neurotransmitter symporter family;Sodium:neurotransmitter symporter family
PSLF89_2759	chromosome	3.78	0	GSHB	HJ	Glutathione synthase/RimK-type ligase ATP-grasp superfamily	ATP-grasp domain protein	glutathione synthetase (EC:6.3.2.3) K01920 glutathione synthase [EC:6.3.2.3]		Pre-ATP-grasp domain	Prokaryotic glutathione synthetase, ATP-grasp domain;Prokaryotic glutathione synthetase, N-terminal domain
PSLF89_1891	chromosome	3.78	0	RRBP1	S	Uncharacterized protein YjbI contains pentapeptide repeats	hypothetical protein	K+-dependent Na+/Ca+ exchanger	(gi:71893550) p97 (MHJ_0194) - putative protein P97 [Mycoplasma hyopneumoniae str. J]
PSLF89_414	chromosome	3.76	0	MLTB	M	Membrane-bound lytic murein transglycosylase B	lytic murein transglycosylase B	putative peptidoglycan-like protein K08305 membrane-bound lytic murein transglycosylase B	(gi:66047584) hopAJ2 (Psyr_4357) - type III effector HopAJ2 [Pseudomonas syringae str. B728a (pv. syringae)]		Transglycosylase SLT domain
PSLF89_2551	chromosome	3.69	0	FLGI	N	Flagellar basal body P-ring protein FlgI	flagellar P-ring protein FlgI		(gi:77457731) flgI (Pfl_1504) - flagellar P-ring protein precursor [Pseudomonas fluorescens str. Pf0-1]		Flagellar P-ring protein
PSLF89_64	chromosome	3.69	0.016	TSAC	J	tRNA A37 threonylcarbamoyladenosine synthetase subunit TsaC/SUA5/YrdC	hypothetical protein	translation factor K07566 L-threonylcarbamoyladenylate synthase [EC:2.7.7.87]		DHBP synthase RibB-like alpha/beta domain	Telomere recombination
PSLF89_08380	pPSLF89-1	3.68	0	--		--	hypothetical protein
PSLF89_2073	chromosome	3.62	0.019	--		--	membrane protein
PSLF89_2435	chromosome	3.62	0.015	--		--	hypothetical protein	transporter		Outer membrane protein/outer membrane enzyme PagP , beta-barrel	Outer membrane protein beta-barrel domain
PSLF89_07555	chromosome	3.61	0	T801	K	Integrase	IS91 family transposase	transposase, IS91 family			Transposase zinc-binding domain;Putative transposase
PSLF89_3218	chromosome	3.6	0	--		--	cadmium carbonic anhydrase
PSLF89_3219	chromosome	3.56	0	--		--	hypothetical protein
PSLF89_2761	chromosome	3.47	0	--		--	hypothetical protein	ABC transporter permease K01992 ABC-2 type transport system permease protein
PSLF89_1400	chromosome	3.42	0	--		--	hypothetical protein
PSLF89_437	chromosome	3.39	0	ZAPA	D	Cell division protein ZapA inhibits GTPase activity of FtsZ	cell division protein ZapA	hypothetical protein K09888 cell division protein ZapA			Cell division protein ZapA
PSLF89_2758	chromosome	3.38	0	--	S	Uncharacterized protein	hypothetical protein	hypothetical protein		Cell wall hydrolase/autolysin, catalytic	Domain of unknown function (DUF1704);N-formylglutamate amidohydrolase
PSLF89_860	chromosome	3.37	0	--		--	hypothetical protein
PSLF89_1176	chromosome	3.34	0	YBCL	G	Predicted arabinose efflux permease MFS family	hypothetical protein	major facilitator superfamily protein			Major Facilitator Superfamily
PSLF89_2509	chromosome	3.29	0	--		--	hypothetical protein
PSLF89_05835	chromosome	3.28	0	PSEUDO		PSEUDO	PSEUDO
PSLF89_1p36	pPSLF89-1	3.24	0	--		--	hypothetical protein
PSLF89_03900	chromosome	3.22	0	--	S	Uncharacterized PurR-regulated membrane protein YhhQ DUF165 family	hypothetical protein				Uncharacterized ACR, YhhQ family COG1738
PSLF89_2903	chromosome	3.2	0	ARSB	P	Arsenite efflux pump ArsB ACR3 family	arsenical-resistance protein	Arsenical-resistance protein ACR3 K03325 arsenite transporter, ACR3 family			Sodium Bile acid symporter family
PSLF89_2540	chromosome	3.2	0	DCTM	R	TRAP-type uncharacterized transport system fused permease components	hypothetical protein	TRAP transporter, 4TM/12TM fusion protein			Domain of unknown function (DUF3394);DctM-like transporters
PSLF89_1625	chromosome	3.18	0	--		--	hypothetical protein
PSLF89_65	chromosome	3.16	0	TOP1	L	ssDNA-binding Zn-finger and Zn-ribbon domains of topoisomerase 1	DNA topoisomerase I	DNA topoisomerase I (EC:5.99.1.2) K03168 DNA topoisomerase I [EC:5.99.1.2]			Toprim domain;Topoisomerase DNA binding C4 zinc finger;Topoisomerase DNA binding C4 zinc finger;Topoisomerase DNA binding C4 zinc finger;DNA topoisomerase
PSLF89_554	chromosome	3.15	0	HFQ	T	sRNA-binding regulator protein Hfq	hypothetical protein				LSM domain
PSLF89_2390	chromosome	3.14	0	TAMA	M	Outer membrane translocation and assembly module TamA	hypothetical protein	surface antigen (D15) K07278 outer membrane protein			Surface antigen
PSLF89_2838	chromosome	3.12	0.031	--		--	nuclease	hypothetical protein		Endonuclease/exonuclease/phosphatase	Endonuclease/Exonuclease/phosphatase family
PSLF89_159	chromosome	3.11	0	--		--	hypothetical protein
PSLF89_07980	chromosome	3.09	0.032	--	X	Transposase and inactivated derivatives	transposase			Winged helix-turn-helix DNA-binding domain	Helix-turn-helix domain
PSLF89_2709	chromosome	3.09	0	--		--	hypothetical protein
PSLF89_06700	chromosome	3.08	0.023	--		--	hypothetical protein
PSLF89_08505	pPSLF89-1	3.08	0	--		--	hypothetical protein
PSLF89_1972	chromosome	3.08	0	YHDW	I	Glycerophosphoryl diester phosphodiesterase	hypothetical protein	glycerophosphoryl diester phosphodiesterase (EC:3.1.4.46) K01126 glycerophosphoryl diester phosphodiesterase [EC:3.1.4.46]		PLC-like phosphodiesterase, TIM beta/alpha-barrel domain	Glycerophosphoryl diester phosphodiesterase family
PSLF89_1892	chromosome	3.05	0	--		--	hypothetical protein
PSLF89_1p68	pPSLF89-1	3.05	0.021	--		--	hypothetical protein
PSLF89_2750	chromosome	3.03	0.027	--		--	hypothetical protein K661_01914
PSLF89_1p227	pPSLF89-1	3.03	0.035	YMO3	S	Uncharacterized protein YjbI contains pentapeptide repeats	hypothetical protein	pentapeptide repeat-containing protein	(gi:161502173) pipB2 (SARI_00196) - hypothetical protein [Salmonella enterica str. RSK2980 (subsp. arizonae serovar 62:z4,z23:--)]		Pentapeptide repeats (8 copies)
PSLF89_1636	chromosome	3.02	0.044	--		--	hypothetical protein
PSLF89_475	chromosome	3.02	0	--		--	hypothetical protein	hypothetical protein
PSLF89_974	chromosome	2.99	0.016	--		--	hypothetical protein
PSLF89_142	chromosome	2.97	0.02	Y2067	QR	2-polyprenyl-3-methyl-5-hydroxy-6-metoxy-14-benzoquinol methylase	methyltransferase	hypothetical protein			Methyltransferase domain;TPR repeat
PSLF89_1070	chromosome	2.95	0	PSEUDO		PSEUDO	PSEUDO
PSLF89_631	chromosome	2.93	0	--		--	hypothetical protein
PSLF89_1p144	pPSLF89-1	2.91	0.011	--		--	hypothetical protein
PSLF89_2125	chromosome	2.87	0	--		--	PAS fold family protein
PSLF89_1033	chromosome	2.85	0	--		--	hypothetical protein
PSLF89_2926	chromosome	2.85	0	--		--	hypothetical protein
PSLF89_783	chromosome	2.84	0	--		--	hypothetical protein
PSLF89_2663	chromosome	2.76	0	GALP	GEPR	MFS family permease	MFS transporter	galP2 major facilitator superfamily galactose-proton symporter			Sugar (and other) transporter
PSLF89_1120	chromosome	2.72	0	--		--	hypothetical protein
PSLF89_2134	chromosome	2.71	0	--		--	hypothetical protein
PSLF89_1969	chromosome	2.71	0	PHL2		Metal-dependent hydrolase endonuclease/exonuclease/phosphatase family	nuclease			Endonuclease/exonuclease/phosphatase	Endonuclease/Exonuclease/phosphatase family
PSLF89_163	chromosome	2.67	0.029	--		--	hypothetical protein
PSLF89_3323	chromosome	2.67	0.017	GSHB	HJ	Glutathione synthase/RimK-type ligase ATP-grasp superfamily	glutathione synthase	glutathione synthetase (EC:6.3.2.3) K01920 glutathione synthase [EC:6.3.2.3]		Pre-ATP-grasp domain	Prokaryotic glutathione synthetase, N-terminal domain;Prokaryotic glutathione synthetase, ATP-grasp domain
PSLF89_3198	chromosome	2.66	0.011	--		--	hypothetical protein
PSLF89_05125	chromosome	2.64	0.001			--	hypothetical protein
PSLF89_1889	chromosome	2.61	0.031	--		--	hypothetical protein
PSLF89_1858	chromosome	2.6	0	PSEUDO		PSEUDO	PSEUDO
PSLF89_2324	chromosome	2.6	0.023	SGMD	T	3'5'-cyclic AMP phosphodiesterase CpdA	phosphoesterase	phosphoesterase			Calcineurin-like phosphoesterase
PSLF89_1p8	pPSLF89-1	2.55	0	NUC1	F	DNA/RNA endonuclease G NUC1	DNA/RNA non-specific endonuclease	DNA/RNA endonuclease G K01173 endonuclease G, mitochondrial		Extracellular Endonuclease, subunit A	DNA/RNA non-specific endonuclease
PSLF89_1793	chromosome	2.54	0.001	MINC	D	Septum formation inhibitor MinC	septum site-determining protein MinC	minC Septum site-determining protein K03610 septum site-determining protein MinC		Cyclase-associated protein CAP/septum formation inhibitor MinC, C-terminal	Septum formation inhibitor MinC, C-terminal domain;Septum formation inhibitor MinC, N-terminal domain
PSLF89_2197	chromosome	2.5	0.011	--	K	Fic family protein	hypothetical protein	hypothetical protein			Domain of unknown function (DUF4172)
PSLF89_2178	chromosome	2.5	0	--		--	hypothetical protein
PSLF89_2152	chromosome	2.5	0.024	CHAA	P	Ca2+/H+ antiporter	calcium:proton antiporter				Sodium/calcium exchanger protein
PSLF89_2210	chromosome	2.46	0.021	AGCS	E	Na+/alanine symporter	amino acid carrier family protein	Na(+)-linked D-alanine glycine permease K03310 alanine or glycine:cation symporter, AGCS family			Sodium:alanine symporter family
PSLF89_1852	chromosome	2.45	0.001	--		Leucine-rich repeat (LRR) protein	hypothetical protein
PSLF89_1289	chromosome	2.45	0.014	SODC1	P	Cu/Zn superoxide dismutase	hypothetical protein	sodC superoxide dismutase (Cu-Zn) (EC:1.15.1.1) K04565 superoxide dismutase, Cu-Zn family [EC:1.15.1.1]	(gi:16764404) sodCI (STM1044) - superoxide dismutase precursor [Salmonella typhimurium str. LT2]	Superoxide dismutase, copper/zinc binding domain	Copper/zinc superoxide dismutase (SODC)
PSLF89_08870	pPSLF89-3	2.43	0.043	--	X	Transposase and inactivated derivatives IS5 family	transposase				Transposase DDE domain
PSLF89_2464	chromosome	2.43	0.03	--		--	hypothetical protein
PSLF89_3249	chromosome	2.42	0	Y894	MV	Multidrug efflux pump subunit AcrA (membrane-fusion protein)	MexH family multidrug efflux RND transporter periplasmic adaptor subunit	acriflavin resistance periplasmic protein K03585 membrane fusion protein			HlyD family secretion protein
PSLF89_3128	chromosome	2.41	0.03	LPTD	M	LPS assembly outer membrane protein LptD (organic solvent tolerance protein OstA)	hypothetical protein	hypothetical protein K04744 LPS-assembly protein			Organic solvent tolerance protein;OstA-like protein
PSLF89_1888	chromosome	2.4	0	--		--	hypothetical protein
PSLF89_2728	chromosome	2.4	0	--		--	hypothetical protein
PSLF89_1944	chromosome	2.39	0.015	YHES	R	ATPase components of ABC transporters with duplicated ATPase domains	ABC transporter ATP-binding protein		(gi:26248273) ybtQ (c2421) - Putative ABC transporter protein [Escherichia coli str. CFT073 (UPEC)]		ABC transporter;ABC transporter;ABC transporter
PSLF89_2218	chromosome	2.37	0	DSBD	O	Thiol:disulfide interchange protein	hypothetical protein	thiol:disulfide interchange protein K04084 thiol:disulfide interchange protein DsbD [EC:1.8.1.8]		Thiol:disulfide interchange protein DsbD, N-terminal domain	Disulphide bond corrector protein DsbC;Cytochrome C biogenesis protein transmembrane region;Thioredoxin-like
PSLF89_2002	chromosome	2.34	0.018	FADH	C	24-dienoyl-CoA reductase or related NADH-dependent reductase Old Yellow Enzyme (OYE) family	24-dienoyl-CoA reductase				Pyridine nucleotide-disulphide oxidoreductase;NADH:flavin oxidoreductase / NADH oxidase family
PSLF89_2001	chromosome	2.33	0.033	--		--	DUF2158 domain-containing protein				Uncharacterized small protein (DUF2158)
PSLF89_1970	chromosome	2.33	0	YBEC	E	Amino acid transporter	amino acid permease	amino acid permease			Amino acid permease
PSLF89_884	chromosome	2.32	0.013	FLIF	NU	Flagellar biosynthesis/type III secretory pathway M-ring protein FliF/YscJ	flagellar M-ring protein FliF	fliF flagellar basal body M-ring protein K02409 flagellar M-ring protein FliF	(gi:104782821) fliF (PSEEN3816) - flagellar basal-body M-ring protein FliF [Pseudomonas entomophila str. L48]		Flagellar M-ring protein C-terminal;Secretory protein of YscJ/FliF family
PSLF89_2754	chromosome	2.31	0.012	ANR	T	cAMP-binding domain of CRP or a regulatory subunit of cAMP-dependent protein kinases	hypothetical protein	transcriptional regulator Anr K01420 CRP/FNR family transcriptional regulator, anaerobic regulatory protein		RmlC-like jelly roll fold	Cyclic nucleotide-binding domain;Crp-like helix-turn-helix domain
PSLF89_2834	chromosome	2.3	0.013	--	TK	DNA-binding transcriptional regulator CsgD family	LuxR family transcriptional regulator		(gi:28871016) ahlR (PSPTO_3863) - transcriptional regulator PsyR [Pseudomonas syringae str. DC3000 (pv. tomato)]	Winged helix-turn-helix DNA-binding domain	Bacterial regulatory proteins, luxR family
PSLF89_1268	chromosome	2.29	0.025	--		--	hypothetical protein
PSLF89_2521	chromosome	2.29	0.013	Y2650	K	DNA-binding transcriptional regulator IscR family	membrane protein	rbn ribonuclease BN K07058 membrane protein			Virulence factor BrkB
PSLF89_06405	chromosome	2.28	0.019	--		--	hypothetical protein
PSLF89_05400	chromosome	2.27	0.017	--		--	hypothetical protein
PSLF89_1903	chromosome	2.26	0	--		--	hypothetical protein
PSLF89_3208	chromosome	2.26	0.016	ILVE	EH	Branched-chain amino acid aminotransferase/4-amino-4-deoxychorismate lyase	branched-chain amino acid aminotransferase				Aminotransferase class IV
PSLF89_3093	chromosome	2.26	0.026	LPTB	M	ABC-type lipopolysaccharide export system ATPase component	ABC transporter ATP-binding protein	ABC transporter, ATP-binding protein K06861 lipopolysaccharide export system ATP-binding protein [EC:3.6.3.-]	(gi:170717476) hitC (HSM_1248) - ABC transporter related [Haemophilus somnus str. 2336]		ABC transporter
PSLF89_133	chromosome	2.25	0	VIRB10	U	Type IV secretory pathway VirB10 components	hypothetical protein	trbI conjugation TrbI-like protein K03195 type IV secretion system protein VirB10	(gi:163868782) virB10 (Btr_1697) - VirB10 protein [Bartonella tribocorum str. CIP 105476]		Bacterial conjugation TrbI-like protein
PSLF89_2274	chromosome	2.24	0.001	--	O	Protein-disulfide isomerase	hypothetical protein	DSBA oxidoreductase		Thioredoxin-like fold	Thioredoxin
PSLF89_1p143	pPSLF89-1	2.24	0.047	--		--	hypothetical protein
PSLF89_1p231	pPSLF89-1	2.23	0.001	DPP5		Dipeptidyl aminopeptidase/acylaminoacyl peptidase	S9 family peptidase				Prolyl oligopeptidase family
PSLF89_174	chromosome	2.22	0.048	--		--	hypothetical protein
PSLF89_1p119	pPSLF89-1	2.21	0	AMID	M	N-acetyl-anhydromuramyl-L-alanine amidase AmpD	N-acetylmuramoyl-L-alanine amidase			N-acetylmuramoyl-L-alanine amidase domain	N-acetylmuramoyl-L-alanine amidase
PSLF89_07170	chromosome	2.18	0	--		--	hypothetical protein
PSLF89_883	chromosome	2.17	0.02	FLIE	N	Flagellar hook-basal body complex protein FliE	flagellar hook-basal body complex protein FliE	fliE flagellar hook-basal body complex protein fliE K02408 flagellar hook-basal body complex protein FliE	(gi:77457762) fliE (Pfl_1535) - flagellar hook-basal body complex protein [Pseudomonas fluorescens str. Pf0-1]		Flagellar hook-basal body complex protein FliE
PSLF89_3196	chromosome	2.16	0	--		--	hypothetical protein
PSLF89_2251	chromosome	2.16	0	KS6AA	T	Serine/threonine protein kinase	hypothetical protein	hypothetical protein K08850 aurora kinase, other [EC:2.7.11.1]			Protein kinase domain
PSLF89_2307	chromosome	2.16	0	PSEUDO		PSEUDO	PSEUDO
PSLF89_1458	chromosome	2.15	0.045	PUTP	E	Na+/proline symporter	sodium:proline symporter	proline:sodium symporter PutP K11928 sodium/proline symporter			Sodium:solute symporter family
PSLF89_609	chromosome	2.13	0.037	--	M	LysM repeat	hypothetical protein	dotC defect in organelle trafficking lipoprotein DotC K12204 defect in organelle trafficking protein DotC	(gi:54298665) dotC (lpp2729) - defect in organelle trafficking lipoprotein DotC [Legionella pneumophila str. Paris]
PSLF89_06975	chromosome	2.13	0.018	--		--	hypothetical protein PSLF89_06975
PSLF89_2296	chromosome	2.12	0	--	M	Enoyl-CoA hydratase/carnithine racemase	hypothetical protein			Porin domain
PSLF89_1081	chromosome	2.12	0.021	FTSX	D	Cell division protein FtsX	ftsX-like permease				FtsX-like permease family
PSLF89_1296	chromosome	2.11	0	KAPCA	TK	Serine phosphatase RsbU regulator of sigma subunit	hypothetical protein	putative serine/threonine protein kinase (EC:2.7.11.1)			Protein kinase domain
PSLF89_1993	chromosome	2.1	0.001	--	U	--	biopolymer transporter ExbD				Biopolymer transport protein ExbD/TolR
PSLF89_07845	chromosome	2.09	0			--	hypothetical protein
PSLF89_1791	chromosome	2.09	0	MINE	D	Septum formation topological specificity factor MinE	cell division topological specificity factor MinE	minE cell division topological specificity factor MinE K03608 cell division topological specificity factor			Septum formation topological specificity factor MinE
PSLF89_2498	chromosome	2.07	0.032	--	K	Curved DNA-binding protein CbpA contains a DnaJ-like domain	hypothetical protein	DnaJ-class molecular chaperone with C-terminal Zn finger domain		DnaJ domain	DnaJ domain;DNA-J related protein
PSLF89_1p44	pPSLF89-1	2.07	0	--		--	hypothetical protein
PSLF89_1283	chromosome	2.07	0.02	AMPG	G	Predicted arabinose efflux permease MFS family	MFS transporter	ampG AmpG K08218 MFS transporter, PAT family, beta-lactamase induction signal transducer AmpG			Major Facilitator Superfamily
PSLF89_1887	chromosome	2.06	0	--		Membrane-associated phospholipid phosphatase	hypothetical protein	hypothetical protein		Phosphatidic acid phosphatase type 2/haloperoxidase	PAP2 superfamily
PSLF89_3029	chromosome	2.05	0.023	KDTA	M	3-deoxy-D-manno-octulosonic-acid transferase	3-deoxy-D-manno-octulosonic acid transferase	3-deoxy-D-manno-octulosonic-acid transferase domain-containing protein K02527 3-deoxy-D-manno-octulosonic-acid transferase[EC:2.4.99.12 2.4.99.13 2.4.99.14 2.4.99.15]	(gi:170718565) kdtA (HSM_0421) - Three-deoxy-D-manno-octulosonic-acid transferase domain protein [Haemophilus somnus str. 2336]		3-Deoxy-D-manno-octulosonic-acid transferase (kdotransferase);Glycosyl transferases group 1
PSLF89_08030	chromosome	2.03	0	--		--	hypothetical protein
PSLF89_18	chromosome	2.03	0	DDL	MR	D-alanine-D-alanine ligase and related ATP-grasp enzymes	D-alanine--D-alanine ligase	D-alanine--D-alanine ligase K01921 D-alanine-D-alanine ligase [EC:6.3.2.4]		ATP-grasp fold, subdomain 1	D-ala D-ala ligase N-terminus;D-ala D-ala ligase N-terminus;D-ala D-ala ligase C-terminus
PSLF89_477	chromosome	2.02	0.033			--	hypothetical protein
PSLF89_1995	chromosome	2	0	--	M	Periplasmic protein TonB links inner and outer membranes	energy transducer TonB				Gram-negative bacterial TonB protein C-terminal
PSLF89_08690	pPSLF89-1	2	0	--		--	hypothetical protein PSLF89_08690 (plasmid)
PSLF89_476	chromosome	1.99	0.034			--	hypothetical protein
PSLF89_2899	chromosome	1.99	0	UBIG	H	2-polyprenyl-3-methyl-5-hydroxy-6-metoxy-14-benzoquinol methylase	bifunctional 3-demethylubiquinone 3-O-methyltransferase/2-octaprenyl-6-hydroxy phenol methylase	ubiquinone biosynthesis O-methyltransferase K00568 2-polyprenyl-6-hydroxyphenyl methylase / 3-demethylubiquinone-9 3-methyltransferase[EC:2.1.1.222 2.1.1.64]			Methyltransferase domain
PSLF89_08290	pPSLF89-1	1.98	0.042	--		--	hypothetical protein
PSLF89_2p26	pPSLF89-2	1.97	0.04	--		--	hypothetical protein				Phage gp6-like head-tail connector protein
PSLF89_2825	chromosome	1.95	0	--	M	Uncharacterized protein involved in outer membrane biogenesis	AsmA family protein				AsmA family
PSLF89_293	chromosome	1.95	0.026	ACR1	R	Short-chain dehydrogenase	short-chain dehydrogenase/reductase	short-chain dehydrogenase/reductase SDR		NAD(P)-binding domain	short chain dehydrogenase
PSLF89_1p95	pPSLF89-1	1.95	0.025	PORTL	X	Phage portal protein BeeE	hypothetical protein	phage portal protein, hk97 family			Phage portal protein
PSLF89_1p109	pPSLF89-1	1.94	0.036	LUXQ	T	Signal transduction histidine kinase regulating C4-dicarboxylate transport system	ATP-binding protein	multi-sensor signal transduction histidine kinase		Histidine kinase-like ATPase, ATP-binding domain	Histidine kinase-, DNA gyrase B-, and HSP90-like ATPase
PSLF89_09045	pPSLF89-4	1.93	0.049	--	V	Antitoxin component HigA of the HigAB toxin-antitoxin module contains an N-terminal HTH domain	transcriptional regulator	XRE family transcriptional regulator K18831 HTH-type transcriptional regulator / antitoxin HigA		Lambda repressor-like, DNA-binding domain	Helix-turn-helix
PSLF89_2421	chromosome	1.93	0	PSEUDO		PSEUDO	PSEUDO
PSLF89_1859	chromosome	1.92	0	--		--	hypothetical protein	hypothetical protein			Protein of unknown function (DUF2975)
PSLF89_2252	chromosome	1.92	0.036	--		--	hypothetical protein
PSLF89_63	chromosome	1.92	0.032	HEM6	H	Coproporphyrinogen III oxidase	coproporphyrinogen III oxidase	Coproporphyrinogen oxidase (EC:1.3.3.3) K00228 coproporphyrinogen III oxidase [EC:1.3.3.3]		Coproporphyrinogen III oxidase, aerobic	Coproporphyrinogen III oxidase
PSLF89_711	chromosome	1.91	0	--		--	hypothetical protein
PSLF89_3050	chromosome	1.91	0.04	PHOB	TK	DNA-binding response regulator OmpR family contains REC and winged-helix (wHTH) domain	DNA-binding response regulator	phosphate regulon transcriptional regulatory protein PhoB K07657 two-component system, OmpR family, phosphate regulon response regulator PhoB	(gi:379760345) prrA (OCQ_09080) - two component response transcriptional regulatory protein prra [Mycobacterium intracellulare str. MOTT 64]		Transcriptional regulatory protein, C terminal;Response regulator receiver domain
PSLF89_137	chromosome	1.89	0.032	VIRB11	UW	Pilus assembly protein ATPase of CpaF family	P-type conjugative transfer ATPase TrbB	conjugal transfer protein TraB	(gi:33152383) tadA (HD1304) - tight adherence protein A [Haemophilus ducreyi str. 35000HP]		Type II/IV secretion system protein
PSLF89_3p51	pPSLF89-3	1.88	0.041	YMO3	S	Uncharacterized protein YjbI contains pentapeptide repeats	hypothetical protein		(gi:161615664) pipB2 (SPAB_03449) - hypothetical protein [Salmonella enterica str. SPB7 (serovar Paratyphi B)]		Pentapeptide repeats (8 copies);Pentapeptide repeats (8 copies)
PSLF89_703	chromosome	1.87	0	HOXA	T	Response regulator c-di-GMP phosphodiesterase RpfG family contains REC and HD-GYP domains	response regulator	response regulator receiver protein		Winged helix-turn-helix DNA-binding domain	Response regulator receiver domain
PSLF89_230	chromosome	1.85	0	--		--	hypothetical protein
PSLF89_1967	chromosome	1.84	0	--	M	Cell wall-associated hydrolase NlpC family	hypothetical protein	NLP/P60 protein		Endopeptidase, NLPC/P60 domain	NlpC/P60 family;SH3 domain of the SH3b1 type
PSLF89_1908	chromosome	1.83	0	PHL2	R	Metal-dependent hydrolase endonuclease/exonuclease/phosphatase family	hypothetical protein	phospholipase C	(gi:57865922) hlb (SERP2544) - beta-hemolysin [Staphylococcus epidermidis str. RP62A]	Endonuclease/exonuclease/phosphatase	Endonuclease/Exonuclease/phosphatase family
PSLF89_08015	chromosome	1.82	0.035	--	X	IS4 transposase	transposase
PSLF89_3205	chromosome	1.8	0	MNEA	R	Putative Ca2+/H+ antiporter TMEM165/GDT1 family	hypothetical protein				Uncharacterized protein family UPF0016;Uncharacterized protein family UPF0016
PSLF89_1p229	pPSLF89-1	1.79	0	--		--	hypothetical protein
PSLF89_06990	chromosome	1.78	0.037	TUSB	O	Sulfur transfer complex TusBCD TusB component DsrH family	hypothetical protein			DsrEFH-like	DsrH like protein
PSLF89_2309	chromosome	1.77	0	PSEUDO		PSEUDO	PSEUDO
PSLF89_3034	chromosome	1.77	0	RFAF	M	ADP-heptose:LPS heptosyltransferase	lipopolysaccharide heptosyltransferase II	ADP-heptose--LPS heptosyltransferase K02843 heptosyltransferase II [EC:2.4.-.-]	(gi:161870387) rfaF (NMCC_1433) - ADP-heptose:LPS heptosyltransferase II [Neisseria meningitidis str. 053442 (serogroup C)]		Glycosyltransferase family 9 (heptosyltransferase)
PSLF89_1074	chromosome	1.76	0.048	--	HJ	Glutathione synthase/RimK-type ligase ATP-grasp superfamily	alpha-L-glutamate ligase-like protein			ATP-grasp fold, subdomain 2	Sugar-transfer associated ATP-grasp
PSLF89_3p15	pPSLF89-3	1.76	0	TIPL	X	Phage-related protein	phage minor tail protein L	hypothetical protein			Phage minor tail protein L
PSLF89_1732	chromosome	1.75	0.04	PRPB	G	2-Methylisocitrate lyase and related enzymes PEP mutase family	methylisocitrate lyase	prpB 2-methylisocitrate lyase (EC:4.1.3.30) K03417 methylisocitrate lyase [EC:4.1.3.30]		Pyruvate/Phosphoenolpyruvate kinase-like domain	Phosphoenolpyruvate phosphomutase
PSLF89_400	chromosome	1.75	0	UBIB	HT	Predicted unusual protein kinase regulating ubiquinone biosynthesis AarF/ABC1/UbiB family	ubiquinone biosynthesis protein UbiB	2-polyprenylphenol 6-hydroxylase K03688 ubiquinone biosynthesis protein			ABC1 family
PSLF89_1553	chromosome	1.74	0	AMPG	P	Nitrate/nitrite transporter NarK	MFS transporter	ampG Muropeptide transporter, permease K08218 MFS transporter, PAT family, beta-lactamase induction signal transducer AmpG			Major Facilitator Superfamily
PSLF89_1611	chromosome	1.74	0	PHOL	T	Phosphate starvation-inducible protein PhoH predicted ATPase	ATPase AAA				PhoH-like protein
PSLF89_3	chromosome	1.74	0	RECF	L	Recombinational DNA repair ATPase RecF	DNA replication and repair protein RecF	recF recombination protein F K03629 DNA replication and repair protein RecF			RecF/RecN/SMC N terminal domain
PSLF89_1418	chromosome	1.74	0.001	TOLC	M	Outer membrane protein TolC	type I secretion protein TolC	type I secretion outer membrane protein, TolC precursor K12340 outer membrane channel protein			Outer membrane efflux protein;Outer membrane efflux protein
PSLF89_3224	chromosome	1.73	0	DAPF	E	Diaminopimelate epimerase	diaminopimelate epimerase				Diaminopimelate epimerase;Diaminopimelate epimerase
PSLF89_472	chromosome	1.72	0.04	--		--	hypothetical protein
PSLF89_2593	chromosome	1.71	0.002			--	hypothetical protein
PSLF89_1p236	pPSLF89-1	1.71	0	PORTL	X	Phage portal protein BeeE	hypothetical protein	phage portal protein, HK97 family			Phage portal protein
PSLF89_2523	chromosome	1.71	0.001	SERA	HR	Phosphoglycerate dehydrogenase or related dehydrogenase	D-3-phosphoglycerate dehydrogenase	3-phosphoglycerate dehydrogenase K00058 D-3-phosphoglycerate dehydrogenase [EC:1.1.1.95]		NAD(P)-binding domain	D-isomer specific 2-hydroxyacid dehydrogenase, NAD binding domain;D-isomer specific 2-hydroxyacid dehydrogenase, catalytic domain
PSLF89_3250	chromosome	1.7	0.001	Y895	V	Multidrug efflux pump subunit AcrB	hypothetical protein	multidrug efflux transporter K18138 multidrug efflux pump			AcrB/AcrD/AcrF family
PSLF89_285	chromosome	1.69	0	HPPK	H	78-dihydro-6-hydroxymethylpterin-pyrophosphokinase	2-amino-4-hydroxy-6-hydroxymethyldihydropteridine diphosphokinase			7,8-Dihydro-6-hydroxymethylpterin-pyrophosphokinase, HPPK	7,8-dihydro-6-hydroxymethylpterin-pyrophosphokinase (HPPK)
PSLF89_1355	chromosome	1.69	0	Y1201	G	Ribulose-5-phosphate 4-epimerase/Fuculose-1-phosphate aldolase	hypothetical protein			Class II aldolase/adducin N-terminal	Class II Aldolase and Adducin N-terminal domain
PSLF89_2747	chromosome	1.68	0.001	--		--	hypothetical protein
PSLF89_579	chromosome	1.67	0			--	hypothetical protein
PSLF89_941	chromosome	1.66	0.001	--	M	Capsule polysaccharide modification protein KpsS	capsule biosynthesis protein				Capsule polysaccharide biosynthesis protein
PSLF89_04745	chromosome	1.64	0	--		--	hypothetical protein
PSLF89_1075	chromosome	1.63	0	--	O	Transglutaminase-like enzyme putative cysteine protease	hypothetical protein				7 transmembrane helices usually fused to an inactive transglutaminase;Inactive transglutaminase fused to 7 transmembrane helices
PSLF89_1478	chromosome	1.63	0	Y471	R	Alpha/beta superfamily hydrolase	enzyme	putative hydrolase of the alpha/beta superfamily K07018			Alpha/beta hydrolase family
PSLF89_2095	chromosome	1.62	0	--		--	hypothetical protein
PSLF89_3260	chromosome	1.62	0	GCVA	K	DNA-binding transcriptional regulator LysR family	hypothetical protein	LysR family transcriptional regulator K03566 LysR family transcriptional regulator, glycine cleavage system transcriptional activator		Winged helix-turn-helix DNA-binding domain	Bacterial regulatory helix-turn-helix protein, lysR family;LysR substrate binding domain
PSLF89_3129	chromosome	1.62	0.001	SURA	O	Parvulin-like peptidyl-prolyl isomerase	SurA domain-containing protein	PpiC-type peptidyl-prolyl cis-trans isomerase K03771 peptidyl-prolyl cis-trans isomerase SurA [EC:5.2.1.8]			PPIC-type PPIASE domain;PPIC-type PPIASE domain;SurA N-terminal domain
PSLF89_305	chromosome	1.61	0	DTD	J	D-Tyr-tRNAtyr deacylase	D-tyrosyl-tRNA(Tyr) deacylase	dtd D-tyrosyl-tRNA deacylase (EC:3.1.-.-) K07560 D-tyrosyl-tRNA(Tyr) deacylase [EC:3.1.-.-]		D-Tyr tRNAtyr deacylase-like domain	D-Tyr-tRNA(Tyr) deacylase
PSLF89_908	chromosome	1.6	0	FEOB	P	Fe2+ transport system protein B	ferrous iron transport protein B	feoB ferrous iron transport protein B K04759 ferrous iron transport protein B	(gi:52842863) feoB (lpg2657) - ferrous iron transporter B [Legionella pneumophila str. Philadelphia 1]		Nucleoside recognition;Nucleoside recognition;Ferrous iron transport protein B C terminus;Ferrous iron transport protein B
PSLF89_877	chromosome	1.59	0	--	S	Uncharacterized conserved protein YcfL	hypothetical protein	hypothetical protein			Protein of unknown function (DUF1425)
PSLF89_09165	pPSLF89-4	1.59	0	--		--	hypothetical protein				Type-F conjugative transfer system protein (TrbI_Ftype)
PSLF89_3032	chromosome	1.59	0	WAAE	M	Glycosyltransferase involved in cell wall bisynthesis	alpha-L-glycero-D-manno-heptose beta-14-glucosyltransferase	glycosyl transferase family protein	(gi:157415395) C8J_1075 - hypothetical protein [Campylobacter jejuni str. 81116 (NCTC11828)]		Glycosyl transferase family 2
PSLF89_2776	chromosome	1.58	0	CHEV	NT	Chemotaxis signal transduction protein	chemotaxis protein CheV	chemotaxis signal transduction protein K03415 two-component system, chemotaxis family, response regulator CheV	(gi:147674785) cheV (VC0395_A1794) - chemotaxis protein CheV [Vibrio cholerae str. O395 chromosome II]		CheW-like domain;Response regulator receiver domain
PSLF89_2871	chromosome	1.58	0	RIBB	H	GTP cyclohydrolase II	34-dihydroxy-2-butanone-4-phosphate synthase	ribA 3,4-dihydroxy-2-butanone 4-phosphate synthase (EC:3.5.4.25) K14652 3,4-dihydroxy 2-butanone 4-phosphate synthase/ GTP cyclohydrolase II [EC:4.1.99.12 3.5.4.25]		DHBP synthase RibB-like alpha/beta domain	3,4-dihydroxy-2-butanone 4-phosphate synthase
PSLF89_1195	chromosome	1.58	0	YHGF	K	Transcriptional accessory protein Tex/SPT6	RNA-binding transcriptional accessory protein	transcriptional accessory protein K06959 uncharacterized protein		YqgF/RNase H-like domain	Helix-hairpin-helix motif;Tex-like protein N-terminal domain;S1 RNA binding domain
PSLF89_05395	chromosome	1.56	0	--		--	hypothetical protein
PSLF89_2602	chromosome	1.55	0	NADB	H	Aspartate oxidase	L-aspartate oxidase	nadB L-aspartate oxidase K00278 L-aspartate oxidase [EC:1.4.3.16]		Succinate dehydrogenase/fumarate reductase flavoprotein, catalytic domain	FAD binding domain;Fumarate reductase flavoprotein C-term
PSLF89_08385	pPSLF89-1	1.54	0			--	hypothetical protein
PSLF89_3148	chromosome	1.54	0	CCA	J	tRNA nucleotidyltransferase/poly(A) polymerase	multifunctional tRNA nucleotidyltransferase/2'3'-cyclic phosphodiesterase/2' nucleotidase/2'phosphatase	tRNA nucleotidyltransferase K00974 tRNA nucleotidyltransferase (CCA-adding enzyme) [EC:2.7.7.72 3.1.3.- 3.1.4.-]			Probable RNA and SrmB- binding site of polymerase A;Poly A polymerase head domain
PSLF89_07415	chromosome	1.53	0	--		--	hypothetical protein		(gi:54298677) icmV (lpp2741) - intracellular multiplication protein IcmV [Legionella pneumophila str. Paris]
PSLF89_2916	chromosome	1.53	0.033	UMPS	F	Orotidine-5'-phosphate decarboxylase	orotidine-5'-phosphate decarboxylase	UMPS uridine monophosphate synthetase K13421 uridine monophosphate synthetase [EC:2.4.2.10 4.1.1.23]		Aldolase-type TIM barrel	Orotidine 5'-phosphate decarboxylase / HUMPS family
PSLF89_3132	chromosome	1.52	0	APAG	P	Uncharacterized protein affecting Mg2+/Co2+ transport	Co2+/Mg2+ efflux protein ApaG	magnesium transporter ApaG K06195 ApaG protein		ApaG domain	Protein of unknown function (DUF525)
PSLF89_1792	chromosome	1.52	0.003	MIND	D	Septum formation inhibitor-activating ATPase MinD	septum site-determining protein MinD	cell division inhibitor membrane ATPase K03609 septum site-determining protein MinD	(gi:118474588) flhG (CFF8240_1509) - ATPase, ParA family [Campylobacter fetus str. 82-40 (subsp. fetus)]		CobQ/CobB/MinD/ParA nucleotide binding domain
PSLF89_930	chromosome	1.52	0	PGLJ	M	Glycosyltransferase involved in cell wall bisynthesis	glycosyl transferase	group 1 glycosyl transferase	(gi:121613107) pglJ (CJJ81176_1144) - general glycosylation pathway protein [Campylobacter jejuni str. 81-176 (subsp. jejuni)]		Glycosyltransferase Family 4;Glycosyl transferases group 1
PSLF89_82	chromosome	1.52	0.001	SYGB	J	Glycyl-tRNA synthetase beta subunit	glycine--tRNA ligase subunit beta	glyS glycyl-tRNA ligase subunit beta (EC:6.1.1.14) K01879 glycyl-tRNA synthetase beta chain [EC:6.1.1.14]			DALR anticodon binding domain;Glycyl-tRNA synthetase beta subunit
PSLF89_3p11	pPSLF89-3	1.51	0	--		--	hypothetical protein
PSLF89_2473	chromosome	1.51	0	MFD	LK	Transcription-repair coupling factor (superfamily II helicase)	transcription-repair coupling factor	mfd transcription-repair coupling factor (EC:3.6.1.-) K03723 transcription-repair coupling factor (superfamily II helicase)[EC:3.6.4.-]			TRCF domain;Helicase conserved C-terminal domain;DEAD/DEAH box helicase;CarD-like/TRCF domain
PSLF89_937	chromosome	1.51	0	PSEF	M	CMP-N-acetylneuraminic acid synthetase	pseudaminic acid cytidylyltransferase	neuA NeuA protein (EC:2.7.7.43) K00983 N-acylneuraminate cytidylyltransferase [EC:2.7.7.43]	(gi:57238363) pseF (CJE1506) - CMP-N-acetylneuraminic acid synthetase [Campylobacter jejuni str. RM1221]		Cytidylyltransferase
PSLF89_1457	chromosome	1.5	0	PUTA	E	Delta 1-pyrroline-5-carboxylate dehydrogenase	bifunctional proline dehydrogenase/L-glutamate gamma-semialdehyde dehydrogenase	pduQ proline dehydrogenase/delta-1-pyrroline-5-carboxylate dehydrogenase K13821 proline dehydrogenase / delta 1-pyrroline-5-carboxylate dehydrogenase [EC:1.5.5.2 1.2.1.88]		Aldehyde dehydrogenase, C-terminal	Proline dehydrogenase;DNA-binding domain of Proline dehydrogenase;Aldehyde dehydrogenase family
PSLF89_874	chromosome	1.5	0	YBEC	E	L-asparagine transporter and related permeases	amino acid permease	amino acid permease			Amino acid permease
PSLF89_3p31	pPSLF89-3	1.49	0			--	hypothetical protein
PSLF89_3116	chromosome	1.49	0.001	--		Type VI protein secretion system component VasK	hypothetical protein				Intracellular multiplication and human macrophage-killing;ImcF-related N-terminal domain;Protein of unknown function (DUF1215)
PSLF89_05915	chromosome	1.49	0	--		--	hypothetical protein
PSLF89_1564	chromosome	1.49	0	FTSK	D	DNA segregation ATPase FtsK/SpoIIIE and related proteins	DNA translocase FtsK	ftsK DNA translocase ftsK K03466 DNA segregation ATPase FtsK/SpoIIIE, S-DNA-T family	(gi:49482524) essC (SAR0284) - hypothetical protein [Staphylococcus aureus str. MRSA252]		Domain of unknown function (DUF4117);FtsK/SpoIIIE family;Ftsk gamma domain
PSLF89_17	chromosome	1.49	0	MURC	M	UDP-N-acetylmuramate-alanine ligase	UDP-N-acetylmuramate--L-alanine ligase	UDP-N-acetylmuramate--L-alanine ligase K01924 UDP-N-acetylmuramate--alanine ligase [EC:6.3.2.8]		Mur ligase, central	Mur ligase middle domain;Mur ligase family, catalytic domain;Mur ligase family, glutamate ligase domain
PSLF89_802	chromosome	1.49	0.008	NANK	KG	Sugar kinase of the NBD/HSP70 family may contain an N-terminal HTH domain	hypothetical protein	N-acetylmannosamine kinase K00885 N-acylmannosamine kinase [EC:2.7.1.60]			ROK family
PSLF89_80	chromosome	1.48	0	GMHBB	E	Histidinol phosphatase or a related phosphatase	D-glycero-beta-D-manno-heptose-17-bisphosphate 7-phosphatase	D,D-heptose 1,7-bisphosphate phosphatase K03273 D-glycero-D-manno-heptose 1,7-bisphosphate phosphatase [EC:3.1.3.82 3.1.3.83]	(gi:118475458) CFF8240_1415 - D,D-heptose 1,7-bisphosphate phosphatase [Campylobacter fetus str. 82-40 (subsp. fetus)]	HAD-like domain	HAD-hyrolase-like
PSLF89_241	chromosome	1.48	0	MUTT	V	8-oxo-dGTP pyrophosphatase MutT and related house-cleaning NTP pyrophosphohydrolases NUDIX family	hypothetical protein	mutator MutT protein K03574 8-oxo-dGTP diphosphatase [EC:3.6.1.55]		Aldolase-type TIM barrel	Thiamine monophosphate synthase/TENI;NUDIX domain
PSLF89_07030	chromosome	1.48	0	Y630	R	Predicted PurR-regulated permease PerM	AI-2E family transporter	hypothetical protein			Domain of unknown function DUF20
PSLF89_1p9	pPSLF89-1	1.47	0	--		--	hypothetical protein
PSLF89_2p31	pPSLF89-2	1.47	0	TIPJ	X	Phage-related protein tail component	hypothetical protein				Putative phage tail protein
PSLF89_3092	chromosome	1.46	0	--	M	Lipopolysaccharide export system protein LptA	Lipopolysaccharide export system protein LptA	LptA, protein essential for LPS transport across the periplasm K09774 lipopolysaccharide export system protein LptA			OstA-like protein
PSLF89_16	chromosome	1.46	0	MURG	M	UDP-N-acetylglucosamine:LPS N-acetylglucosamine transferase	undecaprenyldiphospho-muramoylpentapeptide beta-N-acetylglucosaminyltransferase	murG UDP-N-acetylglucosamine--N-acetylmuramyl-(pentapeptide) pyrophosphoryl-undecaprenol N-acetylglucosamine transferase(Undecaprenyl-PP-MurNAc-pentapeptide-UDPGlcNAc GlcNAc transferase)(EC:2.4.1.227) K02563 UDP-N-acetylglucosamine--N-acetylmuramyl-(pen			Glycosyltransferase family 28 N-terminal domain;Glycosyltransferase family 28 C-terminal domain
PSLF89_1645	chromosome	1.46	0.001	ZIPA		Cell division protein ZipA interacts with FtsZ	hypothetical protein			ZipA, C-terminal FtsZ-binding domain	ZipA, C-terminal FtsZ-binding domain
PSLF89_479	chromosome	1.45	0	BIOH	I	Lysophospholipase alpha-beta hydrolase superfamily	hypothetical protein	carboxylesterase (EC:3.1.1.1) K02170 pimeloyl-[acyl-carrier protein] methyl ester esterase [EC:3.1.1.85]			Alpha/beta hydrolase family
PSLF89_2468	chromosome	1.45	0	LOLD	M	ABC-type lipoprotein export system ATPase component	lipoprotein-releasing system ATP-binding protein LolD	lolD lipoprotein releasing system, ATP-binding protein K09810 lipoprotein-releasing system ATP-binding protein [EC:3.6.3.-]	(gi:194097927) fbpC (NGK_0348) - Fe(3+) ions import ATP-binding protein fbpC [Neisseria gonorrhoeae str. NCCP11945]		ABC transporter
PSLF89_06150	chromosome	1.44	0	--	X	Transposase and inactivated derivatives IS5 family	hypothetical protein	hypothetical protein			Transposase DDE domain
PSLF89_451	chromosome	1.44	0.001	RIR1	F	Ribonucleotide reductase alpha subunit	ribonucleoside-diphosphate reductase subunit alpha	ribonucleotide-diphosphate reductase subunit alpha (EC:1.17.4.1) K00525 ribonucleoside-diphosphate reductase alpha chain[EC:1.17.4.1]			Ribonucleotide reductase, all-alpha domain;ATP cone domain;ATP cone domain;Ribonucleotide reductase, barrel domain
PSLF89_399	chromosome	1.43	0	--	H	Ubiquinone biosynthesis protein UbiJ contains SCP2 domain	SCP-2 sterol transfer family protein	hypothetical protein K03690 ubiquinone biosynthesis protein UbiJ			SCP-2 sterol transfer family
PSLF89_1p61	pPSLF89-1	1.43	0.001	FBH1	L	Superfamily I DNA or RNA helicase	hypothetical protein	DNA helicase			UvrD-like helicase C-terminal domain;UvrD/REP helicase N-terminal domain;RecX family
PSLF89_1506	chromosome	1.43	0	RPOD	K	DNA-directed RNA polymerase sigma subunit (sigma70/sigma32)	RNA polymerase sigma factor RpoD		(gi:118469122) sigA/rpoV (MSMEG_2758) - sigma factor MysA [Mycobacterium smegmatis str. MC2 155]		Sigma-70, region 4;Sigma-70 region 2;Sigma-70 region 3;Sigma-70, non-essential region;Sigma-70 factor, region 1.1;Sigma-70 factor, region 1.2
PSLF89_08675	pPSLF89-1	1.43	0	T431	X	Transposase (or an inactivated derivative)	IS6 family transposase	integrase catalytic region			DDE domain
PSLF89_132	chromosome	1.43	0.001	VIRB9	U	Type IV secretory pathway VirB9 components	hypothetical protein	type IV secretion system protein VirB9 K03204 type IV secretion system protein VirB9			Conjugal transfer protein
PSLF89_08595	pPSLF89-1	1.42	0	--	X	Transposase (or an inactivated derivative)	hypothetical protein PSLF89_08595 (plasmid)	integrase, catalytic region			DDE domain
PSLF89_2564	chromosome	1.42	0	--		--	hypothetical protein
PSLF89_04670	chromosome	1.41	0	--	X	Transposase and inactivated derivatives IS5 family	transposase	hypothetical protein			Transposase DDE domain
PSLF89_1189	chromosome	1.41	0.001	--		--	hypothetical protein
PSLF89_5	chromosome	1.41	0	BIOA	H	Adenosylmethionine-8-amino-7-oxononanoate aminotransferase	adenosylmethionine--8-amino-7-oxononanoate aminotransferase BioA	bioA adenosylmethionine-8-amino-7-oxononanoate aminotransferase (EC:2.6.1.62) K00833 adenosylmethionine-8-amino-7-oxononanoate aminotransferase [EC:2.6.1.62]		Pyridoxal phosphate-dependent transferase, major region, subdomain 1	Aminotransferase class-III
PSLF89_1979	chromosome	1.41	0.001	RNR	K	Exoribonuclease R	ribonuclease R	ribonuclease R K12573 ribonuclease R [EC:3.1.-.-]		Nucleic acid-binding, OB-fold	Ribonuclease B OB domain;Ribonuclease R winged-helix domain;RNB domain;S1 RNA binding domain
PSLF89_928	chromosome	1.41	0	Y1607	M	Glycosyltransferase involved in cell wall bisynthesis	glycosyl hydrolase family 1	Glycosyl transferase group 1	(gi:59802373) lgtG (NGO2072) - lipooligosaccharide glycosyl transferase G [Neisseria gonorrhoeae str. FA 1090]		Glycosyltransferase Family 4;Glycosyl transferases group 1
PSLF89_517	chromosome	1.4	0	--		--	hypothetical protein AB894_00985
PSLF89_744	chromosome	1.4	0	--		--	hypothetical protein
PSLF89_1856	chromosome	1.4	0.001	MSRAB	O	Peptide methionine sulfoxide reductase MsrB	peptide-methionine (R)-S-oxide reductase	Peptide methionine sulfoxide reductase-related protein (EC:1.8.4.11) K07305 peptide-methionine (R)-S-oxide reductase[EC:1.8.4.12]		Peptide methionine sulphoxide reductase MrsB	SelR domain
PSLF89_08625	pPSLF89-1	1.4	0	T431	X	Transposase (or an inactivated derivative)	transposase (plasmid)	integrase catalytic region			DDE domain
PSLF89_2071	chromosome	1.39	0	CYOD	C	Heme/copper-type cytochrome/quinol oxidase subunit 4	cytochrome o ubiquinol oxidase subunit IV	cytochrome o ubiquinol oxidase subunit IV K02300 cytochrome o ubiquinol oxidase operon protein cyoD			Prokaryotic Cytochrome C oxidase subunit IV
PSLF89_1258	chromosome	1.39	0	RNH2	L	Ribonuclease HII	ribonuclease HII	Ribonuclease H (EC:3.1.26.4) K03470 ribonuclease HII [EC:3.1.26.4]			Ribonuclease HII
PSLF89_08370	pPSLF89-1	1.39	0	T431	X	Transposase (or an inactivated derivative)	IS6 family transposase				DDE domain
PSLF89_06945	chromosome	1.39	0	Y132A	X	Transposase and inactivated derivatives	transposase	hypothetical protein			ISXO2-like transposase domain
PSLF89_2215	chromosome	1.38	0	LPXK	M	Tetraacyldisaccharide-1-P 4'-kinase	tetraacyldisaccharide 4'-kinase	lpxK Tetraacyldisaccharide 4'-kinase (Lipid A 4'-kinase) (EC:2.7.1.130) K00912 tetraacyldisaccharide 4'-kinase [EC:2.7.1.130]	(gi:113460801) lpxK (HS_0656) - tetraacyldisaccharide 4'-kinase (lipid-A 4'-kinase) [Haemophilus somnus str. 129PT]		Tetraacyldisaccharide-1-P 4'-kinase
PSLF89_03980	chromosome	1.37	0.001			--	hypothetical protein
PSLF89_1071	chromosome	1.37	0	--		--	hypothetical protein
PSLF89_3p22	pPSLF89-3	1.37	0	--		--	hypothetical protein	hypothetical protein
PSLF89_2976	chromosome	1.37	0	LDC	M	Muramoyltetrapeptide carboxypeptidase LdcA (peptidoglycan recycling)	hypothetical protein PSLF89_2976	ldcA muramoyltetrapeptide carboxypeptidase (EC:3.4.17.13) K01297 muramoyltetrapeptide carboxypeptidase [EC:3.4.17.13]		LD-carboxypeptidase A, C-terminal domain	LD-carboxypeptidase
PSLF89_08635	pPSLF89-1	1.36	0	--	X	Transposase (or an inactivated derivative)	transposase	integrase, catalytic region			DDE domain
PSLF89_2837	chromosome	1.36	0	--		--	hypothetical protein	hypothetical protein
PSLF89_2121	chromosome	1.36	0	FLIA	K	DNA-directed RNA polymerase specialized sigma subunit	RNA polymerase sigma factor FliA		(gi:116049400) fliA (PA14_45630) - motility sigma factor FliA [Pseudomonas aeruginosa str. UCBPP-PA14]		Sigma-70 region 2;Sigma-70 region 3;Sigma-70, region 4
PSLF89_2969	chromosome	1.35	0	--		Uncharacterized protein	hypothetical protein				Uncharacterized protein conserved in bacteria (DUF2066)
PSLF89_3266	chromosome	1.35	0	HEMY		Uncharacterized conserved protein HemY contains two TPR repeats	tetratricopeptide repeat family protein			Tetratricopeptide-like helical	HemY protein N-terminus
PSLF89_3392	chromosome	1.35	0.001	YIDC	M	Membrane protein insertase Oxa1/YidC/SpoIIIJ required for the localization of integral membrane proteins	membrane protein insertase YidC	putative inner membrane protein translocase component YidC K03217 YidC/Oxa1 family membrane protein insertase			YidC periplasmic domain;60Kd inner membrane protein
PSLF89_523	chromosome	1.34	0	--		Permease of the drug/metabolite transporter (DMT) superfamily	hypothetical protein	dotA defect in organelle trafficking protein DotA K12202 defect in organelle trafficking protein DotA	(gi:54295526) dotA (lpl2613) - defect in organelle trafficking protein DotA [Legionella pneumophila str. Lens]
PSLF89_1184	chromosome	1.34	0	--	O	Cysteine protease C1A family	hypothetical protein	cysteine protease
PSLF89_1p121	pPSLF89-1	1.34	0.008	--		--	hypothetical protein				Protein of unknown function (DUF1353)
PSLF89_629	chromosome	1.34	0	--		--	hypothetical protein			Endonuclease/exonuclease/phosphatase	Endonuclease/Exonuclease/phosphatase family
PSLF89_262	chromosome	1.34	0	NDUS1	C	NADH dehydrogenase/NADH:ubiquinone oxidoreductase 75 kD subunit (chain G)	NADH-quinone oxidoreductase subunit G		(gi:169629226) nuoG (MAB_2140) - NADH dehydrogenase subunit G [Mycobacterium abscessus str. ATCC 19977]	Beta-grasp domain	2Fe-2S iron-sulfur cluster binding domain;Molybdopterin oxidoreductase;Molybdopterin oxidoreductase;NADH-ubiquinone oxidoreductase-G iron-sulfur binding region
PSLF89_2573	chromosome	1.34	0	YBEC	E	Amino acid transporter	amino acid permease				Amino acid permease
PSLF89_2466	chromosome	1.33	0	--		--	hypothetical protein
PSLF89_13	chromosome	1.33	0	MRAY	M	UDP-N-acetylmuramyl pentapeptide phosphotransferase/UDP-N-acetylglucosamine-1-phosphate transferase	phospho-N-acetylmuramoyl-pentapeptide-transferase	mraY phospho-N-acetylmuramoyl-pentapeptide-transferase (EC:2.7.8.13) K01000 phospho-N-acetylmuramoyl-pentapeptide-transferase[EC:2.7.8.13]			Phospho-N-acetylmuramoyl-pentapeptide-transferase signature 1;Glycosyl transferase family 4
PSLF89_393	chromosome	1.33	0	SYR	J	Arginyl-tRNA synthetase	arginine--tRNA ligase			Rossmann-like alpha/beta/alpha sandwich fold	tRNA synthetases class I (R);DALR anticodon binding domain;Arginyl tRNA synthetase N terminal domain
PSLF89_08550	pPSLF89-1	1.33	0	TRA4	X	Transposase and inactivated derivatives IS30 family	transposase (plasmid)	putative integrase		Homeodomain-like	Helix-turn-helix domain
PSLF89_08915	pPSLF89-3	1.33	0	TRA4	X	Transposase and inactivated derivatives IS30 family	transposase
PSLF89_3156	chromosome	1.33	0.001	Y107	P	Mg2+ and Co2+ transporter CorB contains DUF21 CBS pair and CorC-HlyC domains	hypothetical protein	transporter			Domain of unknown function DUF21;Transporter associated domain;CBS domain
PSLF89_1160	chromosome	1.32	0.001	G6PI	G	Glucose-6-phosphate isomerase	glucose-6-phosphate isomerase	pgi glucose-6-phosphate isomerase K01810 glucose-6-phosphate isomerase [EC:5.3.1.9]	(gi:113461081) pgi (HS_0938) - glucose-6-phosphate isomerase [Haemophilus somnus str. 129PT]		Phosphoglucose isomerase
PSLF89_401	chromosome	1.32	0	HITA	FGR	Diadenosine tetraphosphate (Ap4A) hydrolase or other HIT family hydrolase	histidine triad nucleotide-binding protein	histidine triad (HIT) protein K02503 histidine triad (HIT) family protein		HIT-like domain	Scavenger mRNA decapping enzyme C-term binding
PSLF89_1226	chromosome	1.32	0	YHDP		Uncharacterized conserved protein YhdP contains DUF3971 and AsmA2 domains	DUF3971 domain-containing protein				AsmA-like C-terminal region
PSLF89_1359	chromosome	1.31	0			--	hypothetical protein
PSLF89_2029	chromosome	1.31	0	--	S	Uncharacterized conserved protein YvlB contains DUF4097 and DUF4098 domains	DUF2807 domain-containing protein	hypothetical protein			Domain of unknown function (DUF4098);Protein of unknown function (DUF2807)
PSLF89_14	chromosome	1.31	0	MURD	M	UDP-N-acetylmuramoylalanine-D-glutamate ligase	UDP-N-acetylmuramoyl-L-alanine--D-glutamate ligase	murD UDP-N-acetylmuramoyl-L-alanyl-D-glutamate synthetase (EC:6.3.2.9) K01925 UDP-N-acetylmuramoylalanine--D-glutamate ligase [EC:6.3.2.9]		Mur ligase, C-terminal	Mur ligase middle domain;Mur ligase family, glutamate ligase domain
PSLF89_3387	chromosome	1.31	0	PARB	D	Chromosome segregation protein Spo0J contains ParB-like nuclease domain	chromosome partitioning protein ParB	chromosome partitioning protein ParB K03497 chromosome partitioning protein, ParB family		Lambda repressor-like, DNA-binding domain	ParB-like nuclease domain
PSLF89_3009	chromosome	1.31	0	PEAMT	H	Ubiquinone/menaquinone biosynthesis C-methylase UbiE	SAM-dependent methyltransferase	type 11 methyltransferase	(gi:15826961) ML0130 - hypothetical protein [Mycobacterium leprae str. TN]		Methyltransferase domain
PSLF89_2289	chromosome	1.31	0.002	PSEUDO		PSEUDO	PSEUDO
PSLF89_1048	chromosome	1.3	0.001	--		--	hypothetical protein			HAD-like domain
PSLF89_3175	chromosome	1.3	0	AMPP	E	Xaa-Pro aminopeptidase	Xaa-Pro aminopeptidase	pepP Xaa-Pro aminopeptidase K01262 Xaa-Pro aminopeptidase [EC:3.4.11.9]			Metallopeptidase family M24;Aminopeptidase P, N-terminal domain
PSLF89_1455	chromosome	1.3	0	C56I	C	Cytochrome b561	prokaryotic cytochrome b561 family protein	hypothetical protein K12262 cytochrome b561			Cytochrome b(N-terminal)/b6/petB
PSLF89_1152	chromosome	1.3	0	TRMB	J	tRNA G46 methylase TrmB	tRNA (guanosine(46)-N7)-methyltransferase TrmB	hypothetical protein K03439 tRNA (guanine-N7-)-methyltransferase [EC:2.1.1.33]			Putative methyltransferase
PSLF89_245	chromosome	1.3	0.001	Y2409	S	Uncharacterized membrane protein YgdD TMEM256/DUF423 family	hypothetical protein	membrane protein			Protein of unknown function (DUF423)
PSLF89_1646	chromosome	1.29	0.001			--	hypothetical protein
PSLF89_08990	pPSLF89-4	1.29	0.002	--		--	hypothetical protein	hypothetical protein
PSLF89_3369	chromosome	1.29	0.002	--		--	hypothetical protein
PSLF89_975	chromosome	1.29	0.001	--		--	hypothetical protein
PSLF89_386	chromosome	1.29	0	DSBB2	O	Disulfide bond formation protein DsbB	disulfide bond formation protein B			Disulphide bond formation protein DsbB-like domain	Disulfide bond formation protein DsbB
PSLF89_310	chromosome	1.29	0	SSRP	O	tmRNA-binding protein	SsrA-binding protein	smpB SsrA-binding protein K03664 SsrA-binding protein		Small protein B	SmpB protein
PSLF89_1566	chromosome	1.29	0.001	SUHB	G	Archaeal fructose-16-bisphosphatase or related enzyme of inositol monophosphatase family	inositol monophosphatase	inositol monophosphatase K01092 myo-inositol-1(or 4)-monophosphatase [EC:3.1.3.25]			Inositol monophosphatase family
PSLF89_1p105	pPSLF89-1	1.28	0	--	V	ABC-type bacteriocin/lantibiotic exporters contain an N-terminal double-glycine peptidase domain	ATPases involved in DNA repair domain protein (plasmid)	hypothetical protein
PSLF89_1374	chromosome	1.28	0.006	GAL7	G	Galactose-1-phosphate uridylyltransferase	galactose-1-phosphate uridylyltransferase	hypothetical protein (EC:2.7.7.10) K00965 UDPglucose--hexose-1-phosphate uridylyltransferase [EC:2.7.7.12]		HIT-like domain	Galactose-1-phosphate uridyl transferase, C-terminal domain;Galactose-1-phosphate uridyl transferase, N-terminal domain
PSLF89_3391	chromosome	1.28	0	MNME	J	tRNA U34 5-carboxymethylaminomethyl modifying GTPase MnmE/TrmE	tRNA uridine-5-carboxymethylaminomethyl(34) synthesis GTPase MnmE	trmE tRNA modification GTPase TrmE K03650 tRNA modification GTPase [EC:3.6.-.-]		GTP-binding protein TrmE/Glycine cleavage system T protein, domain 1	Catalytic cysteine-containing C-terminus of GTPase, MnmE;50S ribosome-binding GTPase;GTP-binding protein TrmE N-terminus
PSLF89_1546	chromosome	1.28	0.001	RELA	TK	(p)ppGpp synthase/hydrolase HD superfamily	GTP diphosphokinase	relA GTP pyrophosphokinase K00951 GTP pyrophosphokinase [EC:2.7.6.5]	(gi:148358987) relA (LPC_0872) - GTP pyrophosphokinase ((p)ppGpp synthetase I) stringent stress response RelA [Legionella pneumophila str. Corby]	Beta-grasp domain	TGS domain;Region found in RelA / SpoT proteins;HD domain;ACT domain
PSLF89_2694	chromosome	1.27	0	--		--	hypothetical protein			EF-hand domain pair
PSLF89_330	chromosome	1.27	0	COAE	H	Dephospho-CoA kinase	dephospho-CoA kinase				Dephospho-CoA kinase
PSLF89_08565	pPSLF89-1	1.26	0	--	X	Transposase (or an inactivated derivative)	transposase	transposase K18320 transposase, IS6 family
PSLF89_1p42	pPSLF89-1	1.26	0	--		--	hypothetical protein
PSLF89_2826	chromosome	1.26	0	MUTY	L	Adenine-specific DNA glycosylase acts on AG and A-oxoG pairs	A/G-specific adenine glycosylase	A/G-specific adenine glycosylase K03575 A/G-specific adenine glycosylase [EC:3.2.2.-]		NUDIX hydrolase domain-like	HhH-GPD superfamily base excision DNA repair protein;Helix-hairpin-helix motif;NUDIX domain
PSLF89_3130	chromosome	1.26	0	PDXA	H	4-hydroxy-L-threonine phosphate dehydrogenase PdxA	4-hydroxythreonine-4-phosphate dehydrogenase PdxA	pdxA 4-hydroxythreonine-4-phosphate dehydrogenase K00097 4-hydroxythreonine-4-phosphate dehydrogenase [EC:1.1.1.262]		Isopropylmalate dehydrogenase-like domain	Pyridoxal phosphate biosynthetic protein PdxA
PSLF89_1680	chromosome	1.26	0	PSEUDO		PSEUDO	PSEUDO
PSLF89_387	chromosome	1.26	0	SYW	J	Tryptophanyl-tRNA synthetase	tryptophan--tRNA ligase			Rossmann-like alpha/beta/alpha sandwich fold	tRNA synthetases class I (W and Y)
PSLF89_3303	chromosome	1.26	0	YFNB	H	FMN phosphatase YigB HAD superfamily	haloacid dehalogenase	HAD family hydrolase K01560 2-haloacid dehalogenase [EC:3.8.1.2]		HAD-like domain	Haloacid dehalogenase-like hydrolase
PSLF89_1926	chromosome	1.25	0.001	--		--	hypothetical protein
PSLF89_3267	chromosome	1.25	0	--		--	hypothetical protein
PSLF89_2793	chromosome	1.25	0.002	PKN1	O	Formylglycine-generating enzyme required for sulfatase activity contains SUMF1/FGE domain	hypothetical protein			Formylglycine-generating sulphatase enzyme domain	Sulfatase-modifying factor enzyme 1;Sulfatase-modifying factor enzyme 1
PSLF89_3006	chromosome	1.25	0	PTH	J	Peptidyl-tRNA hydrolase	aminoacyl-tRNA hydrolase	peptidyl-tRNA hydrolase (EC:3.1.1.29) K01056 peptidyl-tRNA hydrolase, PTH1 family [EC:3.1.1.29]		Peptidyl-tRNA hydrolase	Peptidyl-tRNA hydrolase
PSLF89_1649	chromosome	1.25	0.003	QUEC	J	7-cyano-7-deazaguanine synthase (queuosine biosynthesis)	hypothetical protein	ExsB K06920 7-cyano-7-deazaguanine synthase [EC:6.3.4.20]		Rossmann-like alpha/beta/alpha sandwich fold	Queuosine biosynthesis protein QueC;Queuosine biosynthesis protein QueC
PSLF89_3329	chromosome	1.25	0.001	Y5909	R	Short-chain dehydrogenase	short-chain dehydrogenase	short-chain dehydrogenase/reductase SDR		NAD(P)-binding domain	short chain dehydrogenase
PSLF89_1583	chromosome	1.24	0			--	hypothetical protein
PSLF89_1032	chromosome	1.24	0	--		--	hypothetical protein
PSLF89_249	chromosome	1.24	0.001	KITH	F	Thymidine kinase	thymidine kinase	thymidine kinase K00857 thymidine kinase [EC:2.7.1.21]			Thymidine kinase
PSLF89_1980	chromosome	1.24	0	RLMB	J	tRNA G18 (ribose-2'-O)-methylase SpoU	23S rRNA (guanosine(2251)-2'-O)-methyltransferase RlmB	23S rRNA methyltransferase			RNA 2'-O ribose methyltransferase substrate binding;SpoU rRNA Methylase family
PSLF89_803	chromosome	1.24	0	SC5A6	E	Na+/proline symporter	acetylneuraminate ABC transporter	sodium-glucose/galactose cotransporter K03307 solute:Na+ symporter, SSS family			Sodium:solute symporter family
PSLF89_3210	chromosome	1.24	0	Y882	R	Predicted ATPase Adenine nucleotide alpha hydrolases (AANH) superfamily	hypothetical protein				Uncharacterized BCR, COG1636
PSLF89_1117	chromosome	1.24	0.002	YCCA	R	Integral membrane protein interacts with FtsH	hypothetical protein	yccA hypothetical protein K06890			Inhibitor of apoptosis-promoting Bax1
PSLF89_3239	chromosome	1.23	0	PH4H	E	Phenylalanine-4-hydroxylase	phenylalanine 4-monooxygenase	phhA phenylalanine 4-monooxygenase (EC:1.14.16.1) K00500 phenylalanine-4-hydroxylase [EC:1.14.16.1]		Aromatic amino acid hydroxylase	Biopterin-dependent aromatic amino acid hydroxylase
PSLF89_1603	chromosome	1.23	0	RUVB	L	Holliday junction resolvasome RuvABC ATP-dependent DNA helicase subunit	Holliday junction branch migration DNA helicase RuvB	ruvB Holliday junction DNA helicase RuvB K03551 holliday junction DNA helicase RuvB [EC:3.6.4.12]			Holliday junction DNA helicase ruvB C-terminus;Holliday junction DNA helicase ruvB N-terminus
PSLF89_2849	chromosome	1.23	0	SPOT	TK	(p)ppGpp synthase/hydrolase HD superfamily	bifunctional GTP diphosphokinase/guanosine-3'5'-bis(diphosphate) 3'-diphosphatase	spoT guanosine-3',5'-bis(diphosphate) 3'-pyrophosphohydrolase (EC:3.1.7.2) K01139 guanosine-3',5'-bis(diphosphate) 3'-pyrophosphohydrolase[EC:3.1.7.2]	(gi:108799247) relA (Mmcs_2280) - (p)ppGpp synthetase I, SpoT/RelA [Mycobacterium sp. str. MCS]		ACT domain;TGS domain;Region found in RelA / SpoT proteins;HD domain
PSLF89_473	chromosome	1.22	0			--	hypothetical protein
PSLF89_328	chromosome	1.22	0.002	--		--	hypothetical protein
PSLF89_3301	chromosome	1.22	0	--		--	hypothetical protein			Outer membrane protein/outer membrane enzyme PagP , beta-barrel
PSLF89_3278	chromosome	1.22	0	PORF	M	Opacity protein and related surface antigens	membrane protein	OmpA/MotB domain-containing protein K03286 OmpA-OmpF porin, OOP family	(gi:229593379) PFLU6014 - hypothetical protein [Pseudomonas fluorescens str. SBW25]	Outer membrane protein, OmpA/MotB, C-terminal	Outer membrane protein beta-barrel domain;OmpA family
PSLF89_2942	chromosome	1.22	0	Y399	E	Small neutral amino acid transporter SnatA MarC family	hypothetical protein				MarC family integral membrane protein
PSLF89_1594	chromosome	1.21	0	--		Chemotaxis protein CheX a CheY~P-specific phosphatase	hypothetical protein	hypothetical protein			Chemotaxis phosphatase CheX
PSLF89_03470	chromosome	1.21	0.003	--		--	hypothetical protein
PSLF89_1919	chromosome	1.21	0	PSD	I	Phosphatidylserine decarboxylase	phosphatidylserine decarboxylase				Phosphatidylserine decarboxylase
PSLF89_318	chromosome	1.21	0	RECN	L	DNA repair ATPase RecN	DNA repair protein RecN	recN ATPases involved in DNA repair K03631 DNA repair protein RecN (Recombination protein N)			RecF/RecN/SMC N terminal domain
PSLF89_2234	chromosome	1.21	0.002	YEIE	K	DNA-binding transcriptional regulator LysR family	LysR family transcriptional regulator	LysR family transcriptional regulator			Bacterial regulatory helix-turn-helix protein, lysR family;LysR substrate binding domain
PSLF89_1119	chromosome	1.2	0	--		--	hypothetical protein
PSLF89_3194	chromosome	1.2	0.001	--		--	hypothetical protein
PSLF89_2124	chromosome	1.2	0.01	CHEA	NW	Tfp pilus assembly protein FimV	chemotaxis protein CheA		(gi:28899003) cheA (VP2229) - chemotaxis protein CheA [Vibrio parahaemolyticus str. RIMD 2210633 chromosome I]		Histidine kinase-, DNA gyrase B-, and HSP90-like ATPase;Hpt domain;CheW-like domain;Signal transducing histidine kinase, homodimeric domain
PSLF89_1973	chromosome	1.2	0	GLPT	G	Sugar phosphate permease	glycerol-3-phosphate transporter	glpT glycerol-3-phosphate transporter K02445 MFS transporter, OPA family, glycerol-3-phosphate transporter			Major Facilitator Superfamily
PSLF89_3030	chromosome	1.2	0.001	HLDD	M	Nucleoside-diphosphate-sugar epimerase	ADP-L-glycero-D-mannoheptose-6-epimerase	waaD ADP-L-glycero-D-mannoheptose 6-epimerase K03274 ADP-L-glycero-D-manno-heptose 6-epimerase [EC:5.1.3.20]	(gi:170718537) rfaD (HSM_0397) - ADP-L-glycero-D-manno-heptose-6-epimerase [Haemophilus somnus str. 2336]	NAD(P)-binding domain	NAD dependent epimerase/dehydratase family
PSLF89_3104	chromosome	1.19	0.001	--		Type VI protein secretion system component VasA	hypothetical protein				Bacterial protein of unknown function (DUF879)
PSLF89_1206	chromosome	1.19	0	--	GER	Permease of the drug/metabolite transporter (DMT) superfamily	hypothetical protein	permease of the drug/metabolite transporter (DMT) superfamily			EamA-like transporter family;EamA-like transporter family
PSLF89_07585	chromosome	1.19	0.001	--		--	hypothetical protein
PSLF89_2467	chromosome	1.19	0.001	FTSI	DM	Cell division protein FtsI/penicillin-binding protein 2	hypothetical protein	ftsI cell division protein K03587 cell division protein FtsI (penicillin-binding protein 3)			Penicillin-binding Protein dimerisation domain;Penicillin binding protein transpeptidase domain
PSLF89_1565	chromosome	1.19	0.001	LOLA	M	Outer membrane lipoprotein-sorting protein	hypothetical protein	lolA outer-membrane lipoprotein carrier protein K03634 outer membrane lipoprotein carrier protein			Outer membrane lipoprotein carrier protein LolA
PSLF89_3126	chromosome	1.19	0.001	MPG1	JM	NDP-sugar pyrophosphorylase includes eIF-2Bgamma eIF-2Bepsilon and LPS biosynthesis proteins	hypothetical protein	mannose-1-phosphate guanylyltransferase	(gi:15792741) Cj1423c - putative sugar-phosphate nucleotidyltransferase [Campylobacter jejuni str. NCTC 11168 (subsp. jejuni)]		Nucleotidyl transferase
PSLF89_12	chromosome	1.19	0	MURF	M	UDP-N-acetylmuramyl pentapeptide synthase	hypothetical protein	UDP-N-acetylmuramoylalanyl-D-glutamyl-2,6-diaminopimelate/D-alanyl-D-alanyl ligase K01929 UDP-N-acetylmuramoyl-tripeptide--D-alanyl-D-alanine ligase [EC:6.3.2.10]		Mur ligase, C-terminal	Mur ligase family, catalytic domain;Mur ligase middle domain;Mur ligase family, glutamate ligase domain
PSLF89_1p43	pPSLF89-1	1.18	0	--		--	hypothetical protein				Plasmid replication region DNA-binding N-term
PSLF89_1723	chromosome	1.18	0	DDL	MR	D-alanine-D-alanine ligase and related ATP-grasp enzymes	D-alanine--D-alanine ligase			Pre-ATP-grasp domain	D-ala D-ala ligase C-terminus;D-ala D-ala ligase N-terminus;D-ala D-ala ligase N-terminus
PSLF89_1578	chromosome	1.18	0	DER	R	Predicted GTPases	ribosome biogenesis GTPase Der	GTP-binding protein K03977 GTP-binding protein			KH-domain-like of EngA bacterial GTPase enzymes, C-terminal;50S ribosome-binding GTPase;50S ribosome-binding GTPase
PSLF89_1957	chromosome	1.18	0	MUTS	L	DNA mismatch repair ATPase MutS	DNA mismatch repair protein MutS	mutS methyl-directed mismatch repair protein K03555 DNA mismatch repair protein MutS			MutS domain II;MutS domain III;MutS family domain IV;MutS domain V;MutS domain I
PSLF89_2576	chromosome	1.18	0.001	QSEB	TK	DNA-binding response regulator OmpR family contains REC and winged-helix (wHTH) domain	DNA-binding response regulator		(gi:169628171) mprA (MAB_1076) - two component response transcriptional regulatory protein MprA [Mycobacterium abscessus str. ATCC 19977]	Winged helix-turn-helix DNA-binding domain	Transcriptional regulatory protein, C terminal;Response regulator receiver domain
PSLF89_8	chromosome	1.18	0.001	RSMH	J	16S rRNA C1402 N4-methylase RsmH	16S rRNA (cytosine(1402)-N(4))-methyltransferase	S-adenosyl-methyltransferase MraW K03438 16S rRNA (cytosine1402-N4)-methyltransferase [EC:2.1.1.199]			MraW methylase family
PSLF89_3227	chromosome	1.18	0.001	UVRD	L	Superfamily I DNA or RNA helicase	DNA helicase II				UvrD/REP helicase N-terminal domain;UvrD-like helicase C-terminal domain
PSLF89_3322	chromosome	1.18	0	Y463	H	Coproporphyrinogen III oxidase or related Fe-S oxidoreductase	radical SAM protein	oxygen-independent coproporphyrinogen III oxidase K02495 oxygen-independent coproporphyrinogen III oxidase [EC:1.3.99.22]	(gi:68249065) hemN (NTHI0594) - coproporphyrinogen III oxidase [Haemophilus influenzae str. 86-028NP (nontypeable)]	Radical SAM, alpha/beta horseshoe	HemN C-terminal domain;Radical SAM superfamily
PSLF89_2646	chromosome	1.17	0.001	--		--	hypothetical protein
PSLF89_540	chromosome	1.17	0	FUMC	C	Fumarate hydratase class II	class II fumarate hydratase				Fumarase C C-terminus;Lyase
PSLF89_07505	chromosome	1.17	0	ICMT		--	hypothetical protein	icmT IcmT protein K12222 intracellular multiplication protein IcmT	(gi:52840686) icmT (lpg0441) - IcmT [Legionella pneumophila str. Philadelphia 1]
PSLF89_1909	chromosome	1.17	0	MUTL	L	DNA mismatch repair ATPase MutL	DNA mismatch repair protein MutL	mutL DNA mismatch repair protein K03572 DNA mismatch repair protein MutL		Ribosomal protein S5 domain 2-type fold, subgroup	DNA mismatch repair protein, C-terminal domain;MutL C terminal dimerisation domain;Histidine kinase-, DNA gyrase B-, and HSP90-like ATPase
PSLF89_81	chromosome	1.17	0.001	Y822	I	Acyl-CoA hydrolase	acyl-CoA thioesterase	long-chain acyl-CoA thioester hydrolase (EC:3.1.2.-)			Thioesterase superfamily
PSLF89_2276	chromosome	1.16	0.001	--	E	Amino acid transporter	hypothetical protein	amino acid permease
PSLF89_2568	chromosome	1.16	0.001	--		--	hypothetical protein
PSLF89_1699	chromosome	1.15	0.001			--	hypothetical protein
PSLF89_719	chromosome	1.15	0	Y4TS	E	ABC-type oligopeptide transport system ATPase component	ABC transporter ATP-binding protein	oligopeptide ABC transporter ATP-binding protein OppF K10823 oligopeptide transport system ATP-binding protein	(gi:42561491) oppF (MSC_0975) - oligopeptide ABC transporter, permease component [Mycoplasma mycoides str. PG1]		ABC transporter;Oligopeptide/dipeptide transporter, C-terminal region
PSLF89_591	chromosome	1.14	0	--	M	Putative salt-induced outer membrane protein YdiY	hypothetical protein	hypothetical protein			Protein of unknown function, DUF481
PSLF89_1464	chromosome	1.14	0.001	--		D-alanine-D-alanine ligase and related ATP-grasp enzymes	hypothetical protein	hypothetical protein		ATP-grasp fold, subdomain 2	ATP-grasp domain
PSLF89_2644	chromosome	1.14	0.002	--		--	hypothetical protein PSLF89_2644	hypothetical protein	(gi:13449035) ospD3 (pWR501_p096) - enterotoxin [Shigella flexneri str. M90T (serotype 5a) plasmid pWR501]	Ankyrin repeat-containing domain
PSLF89_958	chromosome	1.14	0.001	--		--	hypothetical protein
PSLF89_05855	chromosome	1.14	0.001	EXBD	U	Biopolymer transport protein ExbD	biopolymer transporter ExbD	biopolymer transport protein ExbD/TolR K03559 biopolymer transport protein ExbD			Biopolymer transport protein ExbD/TolR
PSLF89_1324	chromosome	1.14	0.001	UVRC	L	Excinuclease UvrABC nuclease subunit	excinuclease ABC subunit C			UVR domain	UvrB/uvrC motif;GIY-YIG catalytic domain;Helix-hairpin-helix motif;UvrC Helix-hairpin-helix N-terminal
PSLF89_3310	chromosome	1.14	0.001	Y461	R	Uncharacterized pyridoxal phosphate-containing protein affects Ilv metabolism UPF0001 family	YggS family pyridoxal phosphate enzyme	alanine racemase K06997			Alanine racemase, N-terminal domain
PSLF89_1554	chromosome	1.14	0.001	YOHD	S	Uncharacterized membrane protein DedA SNARE-associated domain	hypothetical protein K661_02092	hypothetical protein			SNARE associated Golgi protein
PSLF89_2592	chromosome	1.13	0.001			--	hypothetical protein
PSLF89_135	chromosome	1.13	0.001	--		Type IV secretory pathway TrbL components	hypothetical protein				TrbL/VirB6 plasmid conjugal transfer protein
PSLF89_76	chromosome	1.13	0.004	--	GER	Permease of the drug/metabolite transporter (DMT) superfamily	EamA family transporter	Permease of the drug/metabolite transporter protein			EamA-like transporter family
PSLF89_251	chromosome	1.13	0.005	AMPD	M	N-acetyl-anhydromuramyl-L-alanine amidase AmpD	N-acetylmuramoyl-L-alanine amidase	N-acetylmuramoyl-L-alanine amidase AmpD (EC:3.5.1.28) K03806 AmpD protein		N-acetylmuramoyl-L-alanine amidase domain	N-acetylmuramoyl-L-alanine amidase
PSLF89_1243	chromosome	1.13	0.001	CDSA	R	Predicted CDP-diglyceride synthetase/phosphatidate cytidylyltransferase	cytidylyltransferase		(gi:29376986) cpsB (EF2494) - phosphatidate cytidylyltransferase [Enterococcus faecalis str. V583]		Cytidylyltransferase family
PSLF89_1809	chromosome	1.13	0.001	DPO3X	L	DNA polymerase III gamma/tau subunits	DNA polymerase III subunit gamma and tau	DNA polymerase III, tau subunit/DNA polymerase III subunit gamma (EC:2.7.7.7) K02343 DNA polymerase III subunit gamma/tau[EC:2.7.7.7]			DNA polymerase III, delta subunit;DNA polymerase III subunits gamma and tau domain III
PSLF89_3035	chromosome	1.13	0.001	GLNE	O	Glutamine synthetase adenylyltransferase	bifunctional glutamine synthetase adenylyltransferase/deadenyltransferase	glutamate-ammonia-ligase adenylyltransferase (EC:2.7.7.42) K00982 glutamate-ammonia-ligase adenylyltransferase [EC:2.7.7.42]			Glutamate-ammonia ligase adenylyltransferase;Glutamate-ammonia ligase adenylyltransferase;GlnD PII-uridylyltransferase
PSLF89_1813	chromosome	1.13	0	MDMC	R	Predicted O-methyltransferase YrrM	hypothetical protein	caffeoyl-CoA O-methyltransferase K00588 caffeoyl-CoA O-methyltransferase [EC:2.1.1.104]			O-methyltransferase
PSLF89_2819	chromosome	1.13	0.001	QUEF	J	NADPH-dependent 7-cyano-7-deazaguanine reductase QueF N-terminal domain	NADPH-dependent 7-cyano-7-deazaguanine reductase QueF	7-cyano-7-deazaguanine reductase K06879 7-cyano-7-deazaguanine reductase [EC:1.7.1.13]			Nitrile reductase, 7-cyano-7-deazaguanine-reductase N-term;QueF-like protein
PSLF89_2142	chromosome	1.13	0.002	Y519	F	Nucleoside permease NupC	hypothetical protein				Nucleoside recognition;Na+ dependent nucleoside transporter C-terminus;Na+ dependent nucleoside transporter N-terminus
PSLF89_189	chromosome	1.12	0	--	S	Uncharacterized conserved protein DUF486 family	hypothetical protein	hypothetical protein K09922 hypothetical protein			Protein of unknown function, DUF486
PSLF89_08340	pPSLF89-1	1.12	0.001	--		--	hypothetical protein				Response regulator receiver domain
PSLF89_2806	chromosome	1.12	0	DHE2	E	NAD-specific glutamate dehydrogenase	NAD-specific glutamate dehydrogenase			NAD(P)-binding domain	Bacterial NAD-glutamate dehydrogenase
PSLF89_08490	pPSLF89-1	1.12	0.001	T431	X	Transposase (or an inactivated derivative)	IS6 family transposase	integrase catalytic region			DDE domain
PSLF89_886	chromosome	1.11	0.001	--		Flagellar biosynthesis/type III secretory pathway protein FliH	flagellar assembly protein FliH		(gi:148546739) fliH (Pput_1500) - flagellar assembly protein FliH [Pseudomonas putida str. F1]		Flagellar assembly protein FliH
PSLF89_306	chromosome	1.11	0.002	PIP	HR	Pimeloyl-ACP methyl ester carboxylesterase	prolyl aminopeptidase	proline iminopeptidase K01259 proline iminopeptidase [EC:3.4.11.5]			alpha/beta hydrolase fold
PSLF89_3222	chromosome	1.11	0	PURU	F	Formyltetrahydrofolate hydrolase	formyltetrahydrofolate deformylase				ACT domain;Formyl transferase
PSLF89_521	chromosome	1.1	0	--		--	hypothetical protein
PSLF89_2836	chromosome	1.1	0	DUG3	R	Predicted glutamine amidotransferase	class II glutamine amidotransferase	glutamine amidotransferase, class-II K07008 glutamine amidotransferase			Glutamine amidotransferases class-II
PSLF89_828	chromosome	1.1	0.001	RECJ	L	Single-stranded DNA-specific exonuclease DHH superfamily may be involved in archaeal DNA replication intiation	single-stranded-DNA-specific exonuclease RecJ	exonuclease RecJ K07462 single-stranded-DNA-specific exonuclease [EC:3.1.-.-]			DHH family;DHHA1 domain
PSLF89_2868	chromosome	1.1	0.002	THIL	H	Thiamine monophosphate kinase	thiamine-phosphate kinase	Thiamine-monophosphate kinase (Thiamine-phosphate kinase) K00946 thiamine-monophosphate kinase [EC:2.7.4.16]		AIR synthase-related protein, C-terminal domain	AIR synthase related protein, C-terminal domain;AIR synthase related protein, N-terminal domain
PSLF89_1201	chromosome	1.1	0.001	UBID	H	3-polyprenyl-4-hydroxybenzoate decarboxylase	3-polyprenyl-4-hydroxybenzoate decarboxylase	UbiD family decarboxylase K03182 4-hydroxy-3-polyprenylbenzoate decarboxylase [EC:4.1.1.98]			3-octaprenyl-4-hydroxybenzoate carboxy-lyase
PSLF89_1860	chromosome	1.09	0.001	--		Gluconate kinase	hypothetical protein	hypothetical protein			Shikimate kinase
PSLF89_2145	chromosome	1.09	0	DGTL1	F	dGTP triphosphohydrolase	dGTPase			Deoxyguanosinetriphosphate triphosphohydrolase, central domain	HD domain;Phosphohydrolase-associated domain
PSLF89_265	chromosome	1.09	0	NUOJ	C	NADH:ubiquinone oxidoreductase subunit 6 (chain J)	hypothetical protein				NADH-ubiquinone/plastoquinone oxidoreductase chain 6
PSLF89_557	chromosome	1.09	0.002	Y1604	P	Phosphate/sulfate permease	phosphate permease				Phosphate transporter family
PSLF89_3261	chromosome	1.08	0.002	--		Tetratricopeptide (TPR) repeat	tetratricopeptide repeat family protein			Tetratricopeptide-like helical	Tetratricopeptide repeat;Tetratricopeptide repeat
PSLF89_496	chromosome	1.08	0.001	--		--	hypothetical protein
PSLF89_537	chromosome	1.08	0.001	--		--	hypothetical protein
PSLF89_1642	chromosome	1.08	0.001	HUPR	KT	Transcriptional regulator containing PAS AAA-type ATPase and DNA-binding Fis domains	response regulator		(gi:146283960) pilR (PST_3646) - two-component response regulator PilR [Pseudomonas stutzeri str. A1501]		Response regulator receiver domain
PSLF89_1910	chromosome	1.08	0.002	MIAA	J	tRNA A37 N6-isopentenylltransferase MiaA	tRNA dimethylallyltransferase	tRNA delta(2)-isopentenylpyrophosphate transferase K00791 tRNA dimethylallyltransferase [EC:2.5.1.75]			IPP transferase
PSLF89_1108	chromosome	1.08	0.004	SCPBL	K	Chromosome segregation and condensation protein ScpB	SMC-Scp complex subunit ScpB	hypothetical protein K06024 segregation and condensation protein B		Winged helix-turn-helix DNA-binding domain	Putative transcriptional regulators (Ypuh-like)
PSLF89_03525	chromosome	1.07	0.001	--	X	IS4 transposase	hypothetical protein	transposase
PSLF89_1100	chromosome	1.07	0	--	G	ABC-type sugar transport system periplasmic component contains N-terminal xre family HTH domain	hypothetical protein	sugar ABC transporter periplasmic protein			Periplasmic binding protein domain
PSLF89_2692	chromosome	1.07	0.001	--		--	hypothetical protein PSLF89_2692
PSLF89_112	chromosome	1.07	0.001	SPEA	E	Arginine decarboxylase (spermidine biosynthesis)	arginine decarboxylase	speA arginine decarboxylase (EC:4.1.1.19) K01585 arginine decarboxylase [EC:4.1.1.19]			Pyridoxal-dependent decarboxylase, C-terminal sheet domain;Pyridoxal-dependent decarboxylase, pyridoxal binding domain
PSLF89_1739	chromosome	1.06	0.019			--	hypothetical protein
PSLF89_2293	chromosome	1.06	0.001	--	R	Predicted Fe-S protein YdhL DUF1289 family	hypothetical protein	hypothetical protein			Protein of unknown function (DUF1289)
PSLF89_05165	chromosome	1.06	0.001	--		--	hypothetical protein AB894_11250
PSLF89_513	chromosome	1.06	0.002	--		--	hypothetical protein
PSLF89_1182	chromosome	1.06	0.001	CHEV	NT	Chemotaxis signal transduction protein	hypothetical protein	response regulator receiver modulated CheW protein K03415 two-component system, chemotaxis family, response regulator CheV	(gi:147674785) cheV (VC0395_A1794) - chemotaxis protein CheV [Vibrio cholerae str. O395 chromosome II]		CheW-like domain
PSLF89_1767	chromosome	1.06	0.003	PABB	EH	Anthranilate/para-aminobenzoate synthases component I	aminodeoxychorismate synthase component I	pabB para-aminobenzoate synthase, component I (EC:4.1.3.-) K01665 para-aminobenzoate synthetase component I [EC:2.6.1.85]	(gi:71735977) pchA (PSPPH_2904) - isochorismate synthase [Pseudomonas syringae str. 1448A (pv. phaseolicola)]	ADC synthase	Anthranilate synthase component I, N terminal region;chorismate binding enzyme
PSLF89_1621	chromosome	1.06	0.004	SYP	J	Prolyl-tRNA synthetase	proline--tRNA ligase			Anticodon-binding	tRNA synthetase class II core domain (G, H, P, S and T);Anticodon binding domain;Aminoacyl-tRNA editing domain
PSLF89_741	chromosome	1.06	0.002	YJIJ	G	Predicted arabinose efflux permease MFS family	MFS transporter	major facilitator transporter			Protein of unknown function (DUF1228)
PSLF89_431	chromosome	1.05	0.003	HSLR	J	Ribosomal 50S subunit-recycling heat shock protein contains S4 domain	RNA-binding protein	heat shock protein K04762 ribosome-associated heat shock protein Hsp15		RNA-binding S4 domain	S4 domain
PSLF89_08845	pPSLF89-3	1.05	0.001	TRA2	X	Transposase and inactivated derivatives IS5 family	IS5/IS1182 family transposase				Transposase DDE domain
PSLF89_327	chromosome	1.04	0.002	RMF	J	Ribosome modulation factor	hypothetical protein	ribosome modulation factor K03812 ribosome modulation factor		Ribosome modulation factor-like domain	Ribosome modulation factor
PSLF89_3272	chromosome	1.04	0.006	TORS	T	K+-sensing histidine kinase KdpD	histidine kinase- DNA gyrase B- and HSP90-like ATPase family protein	envZ two-component system sensor protein, osmolarity sensor protein envz (EC:2.7.13.3) K02484 two-component system, OmpR family, sensor kinase [EC:2.7.13.3]	(gi:152989340) fleS (PSPA7_4273) - two-component sensor [Pseudomonas aeruginosa str. PA7]	Signal transduction histidine kinase EnvZ-like, dimerisation/phosphoacceptor domain	Histidine kinase-, DNA gyrase B-, and HSP90-like ATPase
PSLF89_398	chromosome	1.04	0.001	UBIE	H	Ubiquinone/menaquinone biosynthesis C-methylase UbiE	bifunctional demethylmenaquinone methyltransferase/2-methoxy-6-polyprenyl-14-benzoquinol methylase	2-octaprenyl-6-methoxy-1,4-benzoquinone methylase / demethylmenaquinone methyltransferase K03183 demethylmenaquinone methyltransferase / 2-methoxy-6-polyprenyl-1,4-benzoquinol methylase[EC:2.1.1.163 2.1.1.201]	(gi:121613113) CJJ81176_1418 - putative methyltransferase [Campylobacter jejuni str. 81-176 (subsp. jejuni)]		ubiE/COQ5 methyltransferase family
PSLF89_954	chromosome	1.03	0.001	--	L	DNA replication protein DnaD	phage protein
PSLF89_3221	chromosome	1.03	0.001	--		--	hypothetical protein
PSLF89_1112	chromosome	1.03	0.001	ANMK	M	16-Anhydro-N-acetylmuramate kinase	anhydro-N-acetylmuramic acid kinase	anmK Anhydro-N-acetylmuramic acid kinase (EC:2.7.1.-) K09001 anhydro-N-acetylmuramic acid kinase [EC:2.7.1.170]			Uncharacterised protein family (UPF0075)
PSLF89_481	chromosome	1.03	0.001	BIOD	H	Dethiobiotin synthetase	dethiobiotin synthase	bioD dethiobiotin synthetase BioD (EC:6.3.3.3) K01935 dethiobiotin synthetase [EC:6.3.3.3]			AAA domain
PSLF89_309	chromosome	1.03	0.001	DHPS	H	Dihydropteroate synthase	dihydropteroate synthase	folP dihydropteroate synthase (EC:2.5.1.15) K00796 dihydropteroate synthase [EC:2.5.1.15]		Pterin-binding	Pterin binding enzyme
PSLF89_2929	chromosome	1.03	0.001	ETCB	C	Na+-translocating ferredoxin:NAD+ oxidoreductase RNF RnfB subunit	hypothetical protein	rnfB electron transport complex protein RnfB K03616 electron transport complex protein RnfB			4Fe-4S dicluster domain;Putative Fe-S cluster
PSLF89_05830	chromosome	1.03	0.001	PSEUDO		PSEUDO	PSEUDO
PSLF89_156	chromosome	1.03	0.002	YYBO	G	Sugar phosphate permease	MFS transporter	phtJ major facilitator family transporter (Permease)			Major Facilitator Superfamily;Major Facilitator Superfamily
PSLF89_73	chromosome	1.02	0			--	hypothetical protein
PSLF89_134	chromosome	1.02	0.002	--		--	hypothetical protein
PSLF89_2299	chromosome	1.02	0.003	--		--	hypothetical protein	hypothetical protein
PSLF89_731	chromosome	1.02	0	DTPB	E	Dipeptide/tripeptide permease	MFS transporter	amino acid/peptide transporter K03305 proton-dependent oligopeptide transporter, POT family			POT family
PSLF89_1783	chromosome	1.02	0.004	PROP	GEPR	MFS family permease	sugar (and other) transporter family protein	Major facilitator family transporter			Sugar (and other) transporter
PSLF89_685	chromosome	1.02	0	RNH	L	Ribonuclease HI	ribonuclease HI	ribonuclease H K03469 ribonuclease HI [EC:3.1.26.4]			RNase H
PSLF89_3041	chromosome	1.02	0.001	YDIJ	C	FAD/FMN-containing dehydrogenase	FAD-binding oxidoreductase	FAD/FMN-dependent dehydrogenase K06911		FAD-binding, type 2, subdomain 1	FAD linked oxidases, C-terminal domain;4Fe-4S dicluster domain;FAD binding domain
PSLF89_04400	chromosome	1.01	0.001	--	Q	Aromatic ring-cleaving dioxygenase	hypothetical protein	Dopa 45-dioxygenase K10253 DOPA 4,5-dioxygenase [EC:1.14.99.-]		DOPA-like domain	Dopa 4,5-dioxygenase family
PSLF89_1441	chromosome	1.01	0.001	ATA1	P	Magnesium-transporting ATPase (P-type)	hypothetical protein PSLF89_1441	P-type HAD superfamily ATPase		P-type ATPase, A domain	E1-E2 ATPase
PSLF89_1277	chromosome	1.01	0.005	LCN2		Lantibiotic modifying enzyme	type 2 lantibiotic biosynthesis LanM family protein				Lanthionine synthetase C-like protein;Domain of unknown function (DUF4135);Domain of unknown function (DUF4135)
PSLF89_03805	chromosome	-1	0.001			--	hypothetical protein
PSLF89_2664	chromosome	-1	0.02	--	R	Uncharacterized metalloenzyme YdcJ glyoxalase superfamily	hypothetical protein	hypothetical protein			Domain of unknown function (DUF1338)
PSLF89_08150	pPSLF89-1	-1	0.002	--	X	Transposase and inactivated derivatives IS30 family	transposase (plasmid)	putative integrase		Homeodomain-like	Helix-turn-helix domain
PSLF89_1674	chromosome	-1	0.001	--	T	Signal-transduction protein containing cAMP-binding CBS and nucleotidyltransferase domains	hypothetical protein	hypothetical protein
PSLF89_466	chromosome	-1	0.001	--	R	Predicted permease	hypothetical protein	auxin efflux carrier K07088
PSLF89_2399	chromosome	-1	0.002	--		--	hypothetical protein
PSLF89_2403	chromosome	-1	0.001	--		--	hypothetical protein
PSLF89_2511	chromosome	-1	0.008	--		--	hypothetical protein
PSLF89_2676	chromosome	-1	0.001	--		--	hypothetical protein
PSLF89_637	chromosome	-1	0.003	--		--	hypothetical protein
PSLF89_654	chromosome	-1	0.001	--		--	hypothetical protein
PSLF89_956	chromosome	-1	0.001	--		--	hypothetical protein AB894_09445
PSLF89_968	chromosome	-1	0.001	3MG1	L	3-methyladenine DNA glycosylase Tag	hypothetical protein			DNA glycosylase	Methyladenine glycosylase
PSLF89_2797	chromosome	-1	0.001	CPXA	T	K+-sensing histidine kinase KdpD	two-component sensor histidine kinase		(gi:169628172) mprB (MAB_1077) - two component sensor kinase MprB [Mycobacterium abscessus str. ATCC 19977]	Signal transduction histidine kinase EnvZ-like, dimerisation/phosphoacceptor domain	His Kinase A (phospho-acceptor) domain;Histidine kinase-, DNA gyrase B-, and HSP90-like ATPase;HAMP domain
PSLF89_1315	chromosome	-1	0.003	FADL	I	Long-chain fatty acid transport protein	hypothetical protein	fadL long-chain fatty acid transport protein K06076 long-chain fatty acid transport protein			Outer membrane protein transport protein (OMPP1/FadL/TodX)
PSLF89_2667	chromosome	-1	0.001	FLB		Flagellin and related hook-associated protein FlgL	hypothetical protein	fliC flagellin K02406 flagellin
PSLF89_08560	pPSLF89-1	-1	0.005	INSG	X	IS4 transposase	hypothetical protein	IS4 family transposase			Transposase DDE domain
PSLF89_08960	pPSLF89-4	-1	0.002	INSG	X	IS4 transposase	transposase	IS4 family transposase			Transposase DDE domain
PSLF89_1570	chromosome	-1	0.001	NDK	F	Nucleoside diphosphate kinase	nucleoside-diphosphate kinase	nucleoside diphosphate kinase (EC:2.7.4.6) K00940 nucleoside-diphosphate kinase [EC:2.7.4.6]		Nucleoside diphosphate kinase	Nucleoside diphosphate kinase
PSLF89_2090	chromosome	-1	0.001	PPAC	T	Protein-tyrosine-phosphatase	hypothetical protein	protein tyrosine phosphatase (EC:3.1.3.48) K01104 protein-tyrosine phosphatase [EC:3.1.3.48]	(gi:59710771) wzb (VF0164) - Protein tyrosine phosphatase [Vibrio fischeri str. ES114 chromosome I]		Low molecular weight phosphotyrosine protein phosphatase
PSLF89_1828	chromosome	-1	0.001	PREP	O	Zn-dependent peptidase M16 (insulinase) family	peptidase M16	presequence protease K06972		Peptidase M16 domain	Peptidase M16 inactive domain;Peptidase M16 inactive domain;Insulinase (Peptidase family M16);Peptidase M16C associated
PSLF89_2968	chromosome	-1	0.003	PUR5	F	Phosphoribosylaminoimidazole (AIR) synthetase	phosphoribosylformylglycinamidine cyclo-ligase	purM phosphoribosylformylglycinamidine cyclo-ligase (EC:6.3.3.1) K01933 phosphoribosylformylglycinamidine cyclo-ligase[EC:6.3.3.1]			AIR synthase related protein, N-terminal domain;AIR synthase related protein, C-terminal domain
PSLF89_3319	chromosome	-1	0.003	PURK	F	Phosphoribosylaminoimidazole carboxylase (NCAIR synthetase)	5-(carboxyamino)imidazole ribonucleotide synthase	purK phosphoribosylaminoimidazole carboxylase ATPase subunit (EC:4.1.1.21) K01589 5-(carboxyamino)imidazole ribonucleotide synthase [EC:6.3.4.18]		Pre-ATP-grasp domain	ATP-grasp domain
PSLF89_311	chromosome	-1	0.001	RATA	J	Ribosome association toxin PasT (RatA) of the RatAB toxin-antitoxin module	cyclase	cyclase/dehydrase		START-like domain	Polyketide cyclase / dehydrase and lipid transport
PSLF89_2633	chromosome	-1	0.003	RL9	J	Ribosomal protein L9	50S ribosomal protein L9	50S ribosomal protein L9 K02939 large subunit ribosomal protein L9		Ribosomal protein L9, C-terminal	Ribosomal protein L9, C-terminal domain;Ribosomal protein L9, N-terminal domain
PSLF89_2893	chromosome	-1	0.001	SERC	HE	Phosphoserine aminotransferase	phosphoserine transaminase	phosphoserine aminotransferase (EC:2.6.1.52) K00831 phosphoserine aminotransferase [EC:2.6.1.52]		Pyridoxal phosphate-dependent transferase, major region, subdomain 2	Aminotransferase class-V
PSLF89_1567	chromosome	-1	0.001	TRMJ	J	tRNA C32U32 (ribose-2'-O)-methylase TrmJ or a related methyltransferase	tRNA (cytosine(32)/uridine(32)-2'-O)-methyltransferase TrmJ	TrmH family RNA methyltransferase K15396 tRNA (cytidine32/uridine32-2'-O)-methyltransferase [EC:2.1.1.200]			SpoU rRNA Methylase family
PSLF89_385	chromosome	-1	0.006	TRML	J	tRNA(Leu) C34 or U34 (ribose-2'-O)-methylase TrmL contains SPOUT domain	tRNA (uridine(34)/cytosine(34)/5-carboxymethylaminomethyluridine(34)-2'-O)-methyltransferase TrmL				SpoU rRNA Methylase family
PSLF89_556	chromosome	-1	0.001	Y1603	S	Uncharacterized conserved protein YkaA distantly related to PhoU UPF0111/DUF47 family	hypothetical protein				Protein of unknown function DUF47
PSLF89_226	chromosome	-1	0.002	Y643	Q	2-keto-4-pentenoate hydratase/2-oxohepta-3-ene-17-dioic acid hydratase (catechol pathway)	hypothetical protein	2-keto-4-pentenoate hydratase K16171 fumarylacetoacetate (FAA) hydrolase [EC:3.7.1.2]		Fumarylacetoacetase, C-terminal-related	Fumarylacetoacetate (FAA) hydrolase family
PSLF89_785	chromosome	-1	0.001	YE84	S	Uncharacterized membrane protein	TIGR00701 family protein	hypothetical protein K08973 putative membrane protein			Uncharacterised protein family (UPF0093)
PSLF89_2971	chromosome	-1	0.001	YVDR	V	Multidrug transporter EmrE and related cation transporters	QacE family quaternary ammonium compound efflux SMR transporter	sugE sugE protein-transmembrane protein K11741 quaternary ammonium compound-resistance protein SugE			Small Multidrug Resistance protein
PSLF89_04105	chromosome	-1.01	0.001	--	S	Uncharacterized conserved protein DUF1778 family	hypothetical protein				Protein of unknown function (DUF1778)
PSLF89_2980	chromosome	-1.01	0.003	--		Negative regulator of GroEL contains thioredoxin-like and TPR-like domains	hypothetical protein	hypothetical protein
PSLF89_08520	pPSLF89-1	-1.01	0.002	--		--	hypothetical protein
PSLF89_1004	chromosome	-1.01	0.001	--		--	hypothetical protein			Thioredoxin-like fold
PSLF89_298	chromosome	-1.01	0.001	--		--	prepilin-type cleavage/methylation domain-containing protein
PSLF89_3102	chromosome	-1.01	0.001	--		--	hypothetical protein
PSLF89_404	chromosome	-1.01	0.001	--		--	hypothetical protein
PSLF89_486	chromosome	-1.01	0.001	--		--	hypothetical protein
PSLF89_618	chromosome	-1.01	0.001	--		--	hypothetical protein
PSLF89_849	chromosome	-1.01	0.001	--		--	hypothetical protein KU39_358
PSLF89_69	chromosome	-1.01	0.001	FMT	J	Methionyl-tRNA formyltransferase	methionyl-tRNA formyltransferase	fmt methionyl-tRNA formyltransferase (EC:2.1.2.9) K00604 methionyl-tRNA formyltransferase [EC:2.1.2.9]	(gi:23501412) wbkC (BR0517) - formyltransferase, putative [Brucella suis str. 1330 chromosome I]	Formyl transferase, N-terminal	Formyl transferase, C-terminal domain;Formyl transferase
PSLF89_1974	chromosome	-1.01	0.001	HFLX	J	50S ribosomal subunit-associated GTPase HflX	GTPase HflX	small GTP-binding protein K03665 GTP-binding protein HflX			50S ribosome-binding GTPase;GTP-binding GTPase N-terminal
PSLF89_2952	chromosome	-1.01	0.002	MIP	O	FKBP-type peptidyl-prolyl cis-trans isomerase	hypothetical protein		(gi:54296815) mip (lpp0855) - macrophage infectivity potentiator [Legionella pneumophila str. Paris]	Peptidyl-prolyl cis-trans isomerase, FKBP-type, N-terminal	FKBP-type peptidyl-prolyl cis-trans isomerase;Domain amino terminal to FKBP-type peptidyl-prolyl isomerase
PSLF89_3189	chromosome	-1.01	0.001	ODP2	C	Pyruvate/2-oxoglutarate dehydrogenase complex dihydrolipoamide acyltransferase (E2) component	pyruvate dehydrogenase complex dihydrolipoyllysine-residue acetyltransferase	pyruvate dehydrogenase complex dihydrolipoamide acetyltransferase K00627 pyruvate dehydrogenase E2 component (dihydrolipoamide acetyltransferase) [EC:2.3.1.12]		E3 binding	Biotin-requiring enzyme;Biotin-requiring enzyme;Biotin-requiring enzyme;e3 binding domain;2-oxoacid dehydrogenases acyltransferase (catalytic domain)
PSLF89_857	chromosome	-1.01	0.001	OMPB	S	Uncharacterized conserved protein contains a C-terminal beta-barrel porin domain	autotransporter domain-containing protein				Autotransporter beta-domain
PSLF89_814	chromosome	-1.01	0.003	PPSA	G	Phosphoenolpyruvate-protein kinase (PTS system EI component in bacteria)	phosphoenolpyruvate synthase	phosphoenolpyruvate synthase (EC:2.7.9.2) K01007 pyruvate, water dikinase [EC:2.7.9.2]			PEP-utilising enzyme, mobile domain;Pyruvate phosphate dikinase, PEP/pyruvate binding domain;PEP-utilising enzyme, TIM barrel domain
PSLF89_986	chromosome	-1.01	0.002	RIBF	H	FAD synthase	bifunctional riboflavin kinase/FMN adenylyltransferase			Riboflavin kinase domain	Riboflavin kinase;FAD synthetase
PSLF89_271	chromosome	-1.01	0.001	RIMP	J	Ribosome maturation factor RimP	ribosome maturation factor				Uncharacterised BCR, YhbC family COG0779
PSLF89_2007	chromosome	-1.01	0.001	RL19	J	Ribosomal protein L19	50S ribosomal protein L19				Ribosomal protein L19
PSLF89_07665	chromosome	-1.01	0.002	RL30	J	Ribosomal protein L30/L7E	ribosomal protein L30			Ribosomal protein L30, ferredoxin-like fold domain	Ribosomal protein L30p/L7e
PSLF89_1769	chromosome	-1.01	0.001	SYS	J	Seryl-tRNA synthetase	serine--tRNA ligase	seryl-tRNA synthetase K01875 seryl-tRNA synthetase [EC:6.1.1.11]		Serine-tRNA synthetase, type1, N-terminal	tRNA synthetase class II core domain (G, H, P, S and T);Seryl-tRNA synthetase N-terminal domain
PSLF89_1691	chromosome	-1.01	0.001	THRC	E	Threonine synthase	threonine synthase	Threonine synthase (EC:4.2.3.1) K01733 threonine synthase [EC:4.2.3.1]			Pyridoxal-phosphate dependent enzyme;Threonine synthase N terminus
PSLF89_3p16	pPSLF89-3	-1.01	0.001	TIPK	O	Proteasome lid subunit RPN8/RPN11 contains Jab1/MPN domain metalloenzyme (JAMM) motif	hypothetical protein	hypothetical protein			Prokaryotic homologs of the JAB domain;NlpC/P60 family
PSLF89_106	chromosome	-1.01	0.001	TRPF	E	Phosphoribosylanthranilate isomerase	hypothetical protein	tRPF N-(5'-phosphoribosyl)anthranilate isomerase (EC:5.3.1.24) K01817 phosphoribosylanthranilate isomerase [EC:5.3.1.24]		Aldolase-type TIM barrel	N-(5'phosphoribosyl)anthranilate (PRA) isomerase
PSLF89_708	chromosome	-1.01	0.004	Y1066	M	dTDP-4-amino-46-dideoxygalactose transaminase	aminotransferase class-V family protein	DegT/DnrJ/EryC1/StrS aminotransferase	(gi:33599142) bplF (BB0150) - lipopolysaccharide biosynthesis protein [Bordetella bronchiseptica str. RB50]	Pyridoxal phosphate-dependent transferase, major region, subdomain 1	DegT/DnrJ/EryC1/StrS aminotransferase family
PSLF89_1990	chromosome	-1.01	0.01	Y4RH	F	Phosphoribosylamine-glycine ligase	hypothetical protein	hypothetical protein		ATP-grasp fold, subdomain 2	ATP-grasp domain
PSLF89_1617	chromosome	-1.01	0.001	YADH	V	ABC-type multidrug transport system permease component	ABC transporter permease				ABC-2 type transporter
PSLF89_08875	pPSLF89-3	-1.02	0.001	--	X	Transposase and inactivated derivatives IS5 family	transposase				Transposase DDE domain
PSLF89_08940	pPSLF89-4	-1.02	0.001	--		Transposase	hypothetical protein	hypothetical protein
PSLF89_1p177	pPSLF89-1	-1.02	0	--	V	PIN domain nuclease a component of toxin-antitoxin system (PIN domain)	PIN domain-containing protein	pilus retraction motor protein			PIN domain
PSLF89_09065	pPSLF89-4	-1.02	0.002	--	K	Curved DNA-binding protein CbpA contains a DnaJ-like domain	hypothetical protein	DnaJ-like protein
PSLF89_1593	chromosome	-1.02	0.001	--	D	Chromosome segregation ATPase	hypothetical protein	hypothetical protein			Plasmid replication region DNA-binding N-term
PSLF89_2093	chromosome	-1.02	0.001	--		--	hypothetical protein	cytoplasmic protein			Domain of unknown function (DUF4404)
PSLF89_2449	chromosome	-1.02	0	--		--	hypothetical protein
PSLF89_3251	chromosome	-1.02	0.001	--		--	hypothetical protein
PSLF89_799	chromosome	-1.02	0.001	BDHA	IQR	NAD(P)-dependent dehydrogenase short-chain alcohol dehydrogenase family	SDR family oxidoreductase	3-hydroxybutyrate dehydrogenase K00019 3-hydroxybutyrate dehydrogenase [EC:1.1.1.30]		NAD(P)-binding domain	short chain dehydrogenase
PSLF89_652	chromosome	-1.02	0.002	CUER	K	DNA-binding transcriptional regulator MerR family	heavy metal-responsive transcriptional regulator	MerR family transcriptional regulator			MerR HTH family regulatory protein
PSLF89_794	chromosome	-1.02	0.001	HOLB	L	DNA polymerase III delta prime subunit	DNA polymerase III subunit delta'	DNA polymerase III subunit delta' (EC:2.7.7.7) K02341 DNA polymerase III subunit delta' [EC:2.7.7.7]			DNA polymerase III, delta subunit
PSLF89_1027	chromosome	-1.02	0.001	KPYK2	G	Pyruvate kinase	pyruvate kinase			Pyruvate/Phosphoenolpyruvate kinase-like domain	Pyruvate kinase, barrel domain;Pyruvate kinase, alpha/beta domain
PSLF89_3083	chromosome	-1.02	0.002	MURA	M	UDP-N-acetylglucosamine enolpyruvyl transferase	UDP-N-acetylglucosamine 1-carboxyvinyltransferase	murA UDP-N-acetylglucosamine 1-carboxyvinyltransferase (EC:2.5.1.7) K00790 UDP-N-acetylglucosamine 1-carboxyvinyltransferase[EC:2.5.1.7]		Enolpyruvate transferase domain	EPSP synthase (3-phosphoshikimate 1-carboxyvinyltransferase)
PSLF89_2874	chromosome	-1.02	0.001	NRDR	K	Transcriptional regulator NrdR contains Zn-ribbon and ATP-cone domains	transcriptional regulator NrdR	NrdR family transcriptional regulator K07738 transcriptional repressor NrdR			ATP cone domain
PSLF89_1026	chromosome	-1.02	0.001	PGK	G	3-phosphoglycerate kinase	phosphoglycerate kinase			Phosphoglycerate kinase, N-terminal	Phosphoglycerate kinase
PSLF89_08705	pPSLF89-2	-1.02	0.001	PSEUDO		PSEUDO	PSEUDO
PSLF89_350	chromosome	-1.02	0.004	RL3	J	Ribosomal protein L3	50S ribosomal protein L3				Ribosomal protein L3
PSLF89_942	chromosome	-1.02	0.001	SYT	J	Threonyl-tRNA synthetase	threonine--tRNA ligase				tRNA synthetase class II core domain (G, H, P, S and T);Anticodon binding domain;Threonyl and Alanyl tRNA synthetase second additional domain;TGS domain
PSLF89_08795	pPSLF89-3	-1.02	0.002	TRA4	X	Transposase and inactivated derivatives IS30 family	hypothetical protein	putative integrase		Homeodomain-like	Helix-turn-helix domain
PSLF89_2927	chromosome	-1.02	0.01	UHPC	G	Sugar phosphate permease	MFS transporter	major facilitator family transporter			Major Facilitator Superfamily
PSLF89_3144	chromosome	-1.02	0.001	YBEY	J	ssRNA-specific RNase YbeY 16S rRNA maturation enzyme	rRNA maturation RNase YbeY	putative metalloprotease K07042 probable rRNA maturation factor		Metalloprotease catalytic domain, predicted	Uncharacterized protein family UPF0054
PSLF89_1731	chromosome	-1.02	0	YECD	HR	Nicotinamidase-related amidase	hypothetical protein		(gi:187732104) entB (SbBS512_E0497) - isochorismatase [Shigella boydii str. CDC 3083-94 (serotype 18)]	Isochorismatase-like	Isochorismatase family
PSLF89_499	chromosome	-1.02	0.001	YOHD	S	Uncharacterized membrane protein DedA SNARE-associated domain	DedA family protein	hypothetical protein			SNARE associated Golgi protein
PSLF89_3373	chromosome	-1.03	0.002	--	S	Uncharacterized protein	hypothetical protein	hypothetical protein			2OG-Fe dioxygenase
PSLF89_07100	chromosome	-1.03	0.001	--	X	Transposase and inactivated derivatives IS5 family	IS982 family transposase	hypothetical protein			Transposase DDE domain
PSLF89_2951	chromosome	-1.03	0.002	--	O	Protein-disulfide isomerase	hypothetical protein			Thioredoxin-like fold
PSLF89_1p52	pPSLF89-1	-1.03	0.001	--	R	Predicted nucleotidyltransferase	hypothetical protein	hypothetical protein			Nucleotidyltransferase substrate binding protein like
PSLF89_3233	chromosome	-1.03	0	--	R	Membrane-bound metal-dependent hydrolase YbcI DUF457 family	hypothetical protein	putative membrane-bound metal-dependent hydrolase			Predicted membrane-bound metal-dependent hydrolase (DUF457)
PSLF89_1770	chromosome	-1.03	0.001	--		--	hypothetical protein
PSLF89_2p37	pPSLF89-2	-1.03	0.002	--		--	hypothetical protein				Domain of unknown function (DUF4376)
PSLF89_3318	chromosome	-1.03	0.008	--		--	hypothetical protein
PSLF89_753	chromosome	-1.03	0.001	--		--	hypothetical protein
PSLF89_772	chromosome	-1.03	0.001	--		--	hypothetical protein
PSLF89_3383	chromosome	-1.03	0.014	ATPD	C	FoF1-type ATP synthase delta subunit	ATP synthase F1 subunit delta	ATP synthase F0F1 subunit delta K02113 F-type H+-transporting ATPase subunit delta		F1F0 ATP synthase OSCP/delta subunit, N-terminal domain	ATP synthase delta (OSCP) subunit
PSLF89_2538	chromosome	-1.03	0.003	FABV	I	Trans-2-enoyl-CoA reductase	hypothetical protein	trans-2-enoyl-CoA reductase (EC:1.-.-.-) K00209 enoyl-[acyl-carrier protein] reductase / trans-2-enoyl-CoA reductase(NAD+) [EC:1.3.1.9 1.3.1.44]			Trans-2-enoyl-CoA reductase catalytic region;Enoyl reductase FAD binding domain;NAD(P)H binding domain of trans-2-enoyl-CoA reductase
PSLF89_1713	chromosome	-1.03	0	FLID1	N	Flagellar capping protein FliD	hypothetical protein		(gi:153952081) fliD (JJD26997_1382) - flagellar hook-associated protein FliD [Campylobacter jejuni str. 269.97 (subsp. doylei)]		Flagellar hook-associated protein 2 C-terminus;Flagellar hook-associated protein 2 N-terminus;Flagellin hook IN motif
PSLF89_307	chromosome	-1.03	0.001	GLSA	E	Glutaminase	glutaminase A	Glutaminase K01425 glutaminase [EC:3.5.1.2]		Beta-lactamase/transpeptidase-like	Glutaminase
PSLF89_1301	chromosome	-1.03	0.006	GUAA	F	GMP synthase PP-ATPase domain/subunit	GMP synthase (glutamine-hydrolyzing)	guaA GMP synthase K01951 GMP synthase (glutamine-hydrolysing) [EC:6.3.5.2]		Rossmann-like alpha/beta/alpha sandwich fold	Glutamine amidotransferase class-I;GMP synthase C terminal domain;NAD synthase
PSLF89_2563	chromosome	-1.03	0.002	MNMA	J	tRNA U34 2-thiouridine synthase MnmA/TrmU contains the PP-loop ATPase domain	tRNA (5-methylaminomethyl-2-thiouridylate)-methyltransferase			Rossmann-like alpha/beta/alpha sandwich fold	tRNA methyl transferase
PSLF89_3187	chromosome	-1.03	0.001	PA1	M	Outer membrane phospholipase A	hypothetical protein	phospholipase A1 (EC:3.1.1.32) K01058 phospholipase A1 [EC:3.1.1.32 3.1.1.4]		Phospholipase A1	Phospholipase A1
PSLF89_07640	chromosome	-1.03	0.001	PSEUDO		PSEUDO	PSEUDO
PSLF89_2597	chromosome	-1.03	0.001	PSEUDO		PSEUDO	PSEUDO
PSLF89_3005	chromosome	-1.03	0.001	RL25	J	Ribosomal protein L25 (general stress protein Ctc)	50S ribosomal protein L25/general stress protein Ctc	50S ribosomal protein L25/general stress protein Ctc K02897 large subunit ribosomal protein L25		Ribosomal protein L25, beta domain	Ribosomal protein TL5, C-terminal domain;Ribosomal L25p family
PSLF89_362	chromosome	-1.03	0.009	RL6	J	Ribosomal protein L6P/L9E	50S ribosomal protein L6			Ribosomal protein L6, alpha-beta domain	Ribosomal protein L6;Ribosomal protein L6
PSLF89_343	chromosome	-1.03	0.001	RPOB	K	DNA-directed RNA polymerase beta subunit/140 kD subunit	DNA-directed RNA polymerase subunit beta				RNA polymerase Rpb2, domain 3;RNA polymerase beta subunit external 1 domain;RNA polymerase Rpb2, domain 6;RNA polymerase Rpb2, domain 2;RNA polymerase Rpb2, domain 2;RNA polymerase beta subunit;RNA polymerase Rpb2, domain 7
PSLF89_947	chromosome	-1.03	0.001	SYFB	J	tRNA-binding EMAP/Myf domain	phenylalanine--tRNA ligase subunit beta			Phenylalanine-tRNA ligase, beta subunit, ferrodoxin-fold anticodon-binding	Putative tRNA binding domain;B3/4 domain;Ferredoxin-fold anticodon binding domain;tRNA synthetase B5 domain
PSLF89_531	chromosome	-1.03	0.001	TCR3	G	Predicted arabinose efflux permease MFS family	MFS transporter	multidrug transporter			Major Facilitator Superfamily
PSLF89_184	chromosome	-1.03	0.001	THIO	O	Negative regulator of GroEL contains thioredoxin-like and TPR-like domains	thiol reductase thioredoxin	thioredoxin K03671 thioredoxin 1		Thioredoxin-like fold	Thioredoxin
PSLF89_2621	chromosome	-1.03	0.001	Y1436	S	Uncharacterized conserved protein YqcC DUF446 family	hypothetical protein	hypothetical protein		YqcC-like domain	tRNA pseudouridine synthase C
PSLF89_2255	chromosome	-1.03	0.001	Y4544	KJ	Transcriptional and/or translational regulatory protein YebC/TACO1	YebC/PmpR family DNA-binding transcriptional regulator	putative transcriptional regulatory protein		Transcriptional regulator TACO1-like, domain 2	Transcriptional regulator
PSLF89_07985	chromosome	-1.03	0.001	YI71	X	Transposase InsO and inactivated derivatives	hypothetical protein				HTH-like domain
PSLF89_1353	chromosome	-1.04	0.001	--	Q	Catechol 23-dioxygenase or other lactoylglutathione lyase family enzyme	glyoxalase/Bleomycin resistance /Dioxygenase superfamily protein				Glyoxalase/Bleomycin resistance protein/Dioxygenase superfamily
PSLF89_06830	chromosome	-1.04	0.001	--		--	topoisomerase II				Protein of unknown function (DUF2835)
PSLF89_07445	chromosome	-1.04	0.001	--		--	hypothetical protein
PSLF89_488	chromosome	-1.04	0.001	--		--	hypothetical protein
PSLF89_2164	chromosome	-1.04	0.001	DSBG	O	Protein-disulfide isomerase	thioredoxin			Thioredoxin-like fold	Thioredoxin-like domain
PSLF89_2448	chromosome	-1.04	0.001	ECI2	I	Enoyl-CoA hydratase/carnithine racemase	enoyl-CoA hydratase	enoyl-CoA hydratase/isomerase			Enoyl-CoA hydratase/isomerase family
PSLF89_273	chromosome	-1.04	0.001	IF2	M	Membrane protein involved in colicin uptake	translation initiation factor IF-2				Translation-initiation factor 2;Elongation factor Tu domain 2;Elongation factor Tu GTP binding domain;Translation initiation factor IF-2, N-terminal region;Translation initiation factor IF-2, N-terminal region;Bacterial translation initiation factor IF-2
PSLF89_445	chromosome	-1.04	0.001	IHFB	L	Bacterial nucleoid DNA-binding protein	integration host factor subunit beta	himD integration host factor subunit beta K05788 integration host factor subunit beta		DNA-binding protein HU/Integration host factor	Bacterial DNA-binding protein
PSLF89_3169	chromosome	-1.04	0.002	KDPE	TK	DNA-binding response regulator OmpR family contains REC and winged-helix (wHTH) domain	DNA-binding response regulator	two component transcriptional regulator K07667 two-component system, OmpR family, KDP operon response regulator KdpE	(gi:118468513) prrA (MSMEG_5662) - DNA-binding response regulator PrrA [Mycobacterium smegmatis str. MC2 155]	Winged helix-turn-helix DNA-binding domain	Response regulator receiver domain;Transcriptional regulatory protein, C terminal
PSLF89_1073	chromosome	-1.04	0.001	RISA	H	Riboflavin synthase alpha chain	riboflavin synthase			ATP synthase subunit alpha-like domain	Lumazine binding domain;Lumazine binding domain
PSLF89_08840	pPSLF89-3	-1.04	0.003	TRA4	X	Transposase and inactivated derivatives IS30 family	IS30 family transposase			Homeodomain-like	Helix-turn-helix domain
PSLF89_07860	chromosome	-1.05	0.001	--	X	SRSO17 transposase	transposase	transposase		Transposase, Tn5-like, core	Transposase DDE domain
PSLF89_09215	pPSLF89-4	-1.05	0.001	--		--	hypothetical protein			Arc-type ribbon-helix-helix
PSLF89_2031	chromosome	-1.05	0.002	--		--	alpha/beta hydrolase				Alpha/beta hydrolase family
PSLF89_2628	chromosome	-1.05	0.001	17KD	M	Surface antigen	surface antigen	17 kDa surface antigen			Glycine zipper 2TM domain
PSLF89_1557	chromosome	-1.05	0	CLPS	O	ATP-dependent Clp protease adapter protein ClpS	ATP-dependent Clp protease adaptor ClpS	clpS ATP-dependent Clp protease adaptor protein ClpS K06891 ATP-dependent Clp protease adaptor protein ClpS		Ribosomal protein L7/L12, C-terminal/adaptor protein ClpS-like	ATP-dependent Clp protease adaptor protein ClpS
PSLF89_2177	chromosome	-1.05	0.001	DPO3E	L	DNA polymerase III epsilon subunit or related 3'-5' exonuclease	DNA polymerase III subunit epsilon				Exonuclease
PSLF89_925	chromosome	-1.05	0.001	EFP	J	Translation elongation factor P (EF-P)/translation initiation factor 5A (eIF-5A)	elongation factor P	elongation factor P K02356 elongation factor P		Nucleic acid-binding, OB-fold	Elongation factor P, C-terminal;Elongation factor P (EF-P) OB domain;Elongation factor P (EF-P) KOW-like domain
PSLF89_05510	chromosome	-1.05	0	FER	F	NAD-dependent dihydropyrimidine dehydrogenase PreA subunit	ferredoxin				Domain of unknown function (DUF3470);4Fe-4S binding domain
PSLF89_991	chromosome	-1.05	0.001	FKBX	O	FKBP-type peptidyl-prolyl cis-trans isomerase 2	hypothetical protein				FKBP-type peptidyl-prolyl cis-trans isomerase
PSLF89_3082	chromosome	-1.05	0.001	GCH1L	H	Putative GTP cyclohydrolase 1 type 2 NIF3 family	Nif3-like dinuclear metal center hexameric protein	dinuclear metal center protein			NIF3 (NGG1p interacting factor 3)
PSLF89_3151	chromosome	-1.05	0.003	MCP3	KT	Transcriptional regulator containing PAS AAA-type ATPase and DNA-binding Fis domains	hypothetical protein AVI53_06460	methyl-accepting chemotaxis sensory transducer, Pas/Pac sensor K03776 aerotaxis receptor			Methyl-accepting chemotaxis protein (MCP) signalling domain
PSLF89_277	chromosome	-1.05	0.001	PNP	J	Polyribonucleotide nucleotidyltransferase (polynucleotide phosphorylase)	polyribonucleotide nucleotidyltransferase				S1 RNA binding domain;3' exoribonuclease family, domain 1;3' exoribonuclease family, domain 1;KH domain;Polyribonucleotide nucleotidyltransferase, RNA binding domain;3' exoribonuclease family, domain 2;3' exoribonuclease family, domain 2
PSLF89_935	chromosome	-1.05	0.004	PSEB	MO	NDP-sugar epimerase includes UDP-GlcNAc-inverting 46-dehydratase FlaA1 and capsular polysaccharide biosynthesis protein EpsC	UDP-N-acetylglucosamine 46-dehydratase (inverting)	pseB UDP-N-acetylglucosamine 4,6-dehydratase (EC:4.2.1.115) K15894 UDP-N-acetylglucosamine 4,6-dehydratase [EC:4.2.1.115]	(gi:121612602) pseB (CJJ81176_1310) - polysaccharide biosynthesis protein [Campylobacter jejuni str. 81-176 (subsp. jejuni)]	NAD(P)-binding domain	Polysaccharide biosynthesis protein
PSLF89_2607	chromosome	-1.05	0	QACF	V	Multidrug transporter EmrE and related cation transporters	hypothetical protein	small multidrug resistance protein K11741 quaternary ammonium compound-resistance protein SugE			Small Multidrug Resistance protein
PSLF89_274	chromosome	-1.05	0.001	RBFA	J	Ribosome-binding factor A	ribosome-binding factor A			K homology domain-like, alpha/beta	Ribosome-binding factor A
PSLF89_1241	chromosome	-1.05	0	RRF	J	Ribosome recycling factor	ribosome-recycling factor				Ribosome recycling factor
PSLF89_2891	chromosome	-1.05	0.001	RS1	J	Polyribonucleotide nucleotidyltransferase (polynucleotide phosphorylase)	30S ribosomal protein S1	rpsA 30S ribosomal protein S1 K02945 small subunit ribosomal protein S1		Nucleic acid-binding, OB-fold	S1 RNA binding domain;S1 RNA binding domain;S1 RNA binding domain;S1 RNA binding domain;S1 RNA binding domain;S1 RNA binding domain
PSLF89_1761	chromosome	-1.05	0.001	TGT	J	Queuine/archaeosine tRNA-ribosyltransferase	tRNA-guanine(34) transglycosylase	tgt queuine tRNA-ribosyltransferase (EC:2.4.2.29) K00773 queuine tRNA-ribosyltransferase [EC:2.4.2.29]		tRNA-guanine(15) transglycosylase-like	Queuine tRNA-ribosyltransferase
PSLF89_253	chromosome	-1.05	0.001	TPIS	G	Triosephosphate isomerase	triose-phosphate isomerase	triosephosphate isomerase (EC:5.3.1.1) K01803 triosephosphate isomerase (TIM) [EC:5.3.1.1]		Aldolase-type TIM barrel	Triosephosphate isomerase
PSLF89_102	chromosome	-1.05	0.001	TRPE	EH	Anthranilate/para-aminobenzoate synthases component I	hypothetical protein	tRPE Anthranilate synthase component 1 (EC:4.1.3.27) K01657 anthranilate synthase component I [EC:4.1.3.27]	(gi:41408303) mbtI (MAP2205c) - anthranilate synthase component I [Mycobacterium avium str. K-10 (subsp. paratuberculosis)]	ADC synthase	chorismate binding enzyme;Anthranilate synthase component I, N terminal region
PSLF89_05460	chromosome	-1.06	0.002	--	X	Transposase and inactivated derivatives IS5 family	transposase	hypothetical protein			Transposase DDE domain
PSLF89_08735	pPSLF89-2	-1.06	0.007	--	X	Phage terminase small subunit	hypothetical protein				Phage terminase, small subunit
PSLF89_09040	pPSLF89-4	-1.06	0.003	--	J	mRNA-degrading endonuclease (mRNA interferase) HigB toxic component of the HigAB toxin-antitoxin module	toxin RelE (plasmid)	hypothetical protein			Uncharacterized protein conserved in bacteria (DUF2136)
PSLF89_3p57	pPSLF89-3	-1.06	0.001	--	N	Cellulose biosynthesis protein BcsQ	hypothetical protein				CobQ/CobB/MinD/ParA nucleotide binding domain
PSLF89_1312	chromosome	-1.06	0.001	--		--	hypothetical protein
PSLF89_09220	pPSLF89-4	-1.06	0.002	235L	C	Trans-aconitate methyltransferase	hypothetical protein PSLF89_09220 (plasmid)	hypothetical protein			Methyltransferase domain
PSLF89_244	chromosome	-1.06	0.004	ESTP		Uncharacterized protein YhjY contains autotransporter beta-barrel domain	hypothetical protein	G-D-S-L family lipolytic protein		SGNH hydrolase-type esterase domain	GDSL-like Lipase/Acylhydrolase
PSLF89_3025	chromosome	-1.06	0.001	GCSPB	E	Glycine cleavage system protein P (pyridoxal-binding) C-terminal domain	glycine dehydrogenase (aminomethyl-transferring)	gcsB glycine dehydrogenase subunit 2 (EC:1.4.4.2) K00283 glycine dehydrogenase subunit 2 [EC:1.4.4.2]		Pyridoxal phosphate-dependent transferase, major region, subdomain 1	Glycine cleavage system P-protein
PSLF89_320	chromosome	-1.06	0.001	GRPE	O	Molecular chaperone GrpE (heat shock protein)	nucleotide exchange factor GrpE	heat shock protein GrpE K03687 molecular chaperone GrpE		GrpE nucleotide exchange factor, coiled-coil	GrpE
PSLF89_2044	chromosome	-1.06	0.001	KDSA	M	3-deoxy-D-manno-octulosonic acid (KDO) 8-phosphate synthase	3-deoxy-8-phosphooctulonate synthase	kdsA 2-dehydro-3-deoxyphosphooctonate aldolase (EC:2.5.1.55) K01627 2-dehydro-3-deoxyphosphooctonate aldolase (KDO 8-P synthase) [EC:2.5.1.55]	(gi:33152005) kdsA (HD0857) - 2-dehydro-3-deoxyphosphooctonate aldolase [Haemophilus ducreyi str. 35000HP]	Aldolase-type TIM barrel	DAHP synthetase I family
PSLF89_921	chromosome	-1.06	0.001	OBG	DL	GTPase involved in cell partioning and DNA repair	GTPase ObgE	obgE GTP-binding protein K03979 GTP-binding protein		GTP1/OBG domain	50S ribosome-binding GTPase;GTP1/OBG
PSLF89_1316	chromosome	-1.06	0.001	SPEE	E	Spermidine synthase	spermidine synthase	spermidine synthase (EC:2.5.1.16) K00797 spermidine synthase [EC:2.5.1.16]			Spermine/spermidine synthase
PSLF89_08895	pPSLF89-3	-1.06	0.002	T801		Integrase	IS91 family transposase				Putative transposase;Transposase zinc-binding domain
PSLF89_1460	chromosome	-1.06	0	Y937		Outer membrane protein (porin)	hypothetical protein			Porin domain	Protein of unknown function (DUF3573)
PSLF89_3106	chromosome	-1.07	0.016	--	U	Predicted component of the type VI protein secretion system	hypothetical protein	hypothetical protein K11900 type VI secretion system protein ImpC	(gi:229593385) PFLU6020 - hypothetical protein [Pseudomonas fluorescens str. SBW25]		Protein of unknown function (DUF877)
PSLF89_1123	chromosome	-1.07	0.002	--	H	6-pyruvoyl-tetrahydropterin synthase	hypothetical protein	hypothetical protein			6-pyruvoyl tetrahydropterin synthase
PSLF89_05780	chromosome	-1.07	0.001	--		--	hypothetical protein
PSLF89_787	chromosome	-1.07	0.002	--		--	hypothetical protein
PSLF89_1991	chromosome	-1.07	0.005	FECA	P	Outer membrane receptor for Fe3+-dicitrate	TonB-dependent siderophore receptor		(gi:152984528) fpvA (PSPA7_2861) - ferrichrome-iron receptor (Ferric hydroxamate uptake)(Ferric hydroxamate receptor) [Pseudomonas aeruginosa str. PA7]	TonB-dependent receptor, beta-barrel	TonB-dependent Receptor Plug Domain
PSLF89_4	chromosome	-1.07	0.009	GYRB	L	DNA gyrase/topoisomerase IV subunit B	DNA gyrase subunit B	gyrB DNA gyrase, subunit B (EC:5.99.1.3) K02470 DNA gyrase subunit B [EC:5.99.1.3]		Ribosomal protein S5 domain 2-type fold, subgroup	Toprim domain;DNA gyrase B;Histidine kinase-, DNA gyrase B-, and HSP90-like ATPase;DNA gyrase B subunit, carboxyl terminus
PSLF89_2959	chromosome	-1.07	0.003	HMP	C	Ferredoxin-NADP reductase	nitric oxide dioxygenase				Globin;Oxidoreductase NAD-binding domain;Oxidoreductase FAD-binding domain
PSLF89_3321	chromosome	-1.07	0	IXTPA	F	Inosine/xanthosine triphosphate pyrophosphatase all-alpha NTP-PPase family	non-canonical purine NTP pyrophosphatase	deoxyribonucleotide triphosphate pyrophosphatase K02428 XTP/dITP diphosphohydrolase [EC:3.6.1.66]	(gi:148827416) orfM (CGSHiGG_04080) - putative deoxyribonucleotide triphosphate pyrophosphatase [Haemophilus influenzae str. PittGG (nontypeable)]		Ham1 family
PSLF89_272	chromosome	-1.07	0	NUSA	R	Predicted nuclease RecB family	transcription termination/antitermination protein NusA			Nucleic acid-binding, OB-fold	S1 RNA binding domain;NusA N-terminal domain;NusA-like KH domain;Helix-hairpin-helix domain
PSLF89_66	chromosome	-1.07	0.003	SMG	S	Uncharacterized conserved protein Smg DUF494 family	hypothetical protein	hypothetical protein K03747 Smg protein			Protein of unknown function (DUF494)
PSLF89_1p102	pPSLF89-1	-1.07	0.001	VAPB2	S	Virulence-associated protein VagC (function unknown)	AbrB/MazE/SpoVT family DNA-binding domain-containing protein	vapB putative virulence associated protein B K18829 antitoxin VapB			Antidote-toxin recognition MazE
PSLF89_227	chromosome	-1.07	0	VLLY	ER	4-hydroxyphenylpyruvate dioxygenase and related hemolysins	4-hydroxyphenylpyruvate dioxygenase	hppD 4-hydroxyphenylpyruvate dioxygenase (EC:1.13.11.27) K00457 4-hydroxyphenylpyruvate dioxygenase [EC:1.13.11.27]			Hydroxyphenylpyruvate dioxygenase, HPPD, N-terminal;Glyoxalase/Bleomycin resistance protein/Dioxygenase superfamily
PSLF89_2242	chromosome	-1.07	0.001	Y1242	M	Murein tripeptide amidase MpaA	hypothetical protein	Zinc-carboxypeptidase			Zinc carboxypeptidase
PSLF89_05745	chromosome	-1.07	0	Y1494	I	Acyl-CoA thioesterase FadM	hypothetical protein				Thioesterase superfamily
PSLF89_187	chromosome	-1.07	0	Y1556	CHR	Lactate dehydrogenase or related 2-hydroxyacid dehydrogenase	hypothetical protein	glycerate dehydrogenase (EC:1.1.1.29)		NAD(P)-binding domain	D-isomer specific 2-hydroxyacid dehydrogenase, catalytic domain;D-isomer specific 2-hydroxyacid dehydrogenase, NAD binding domain
PSLF89_08925	pPSLF89-4	-1.07	0.005	Y1708	N	Cellulose biosynthesis protein BcsQ	hypothetical protein	hypothetical protein			CobQ/CobB/MinD/ParA nucleotide binding domain
PSLF89_2320	chromosome	-1.08	0	--	J	Ribosomal protein L27	cupin	hypothetical protein		RmlC-like jelly roll fold
PSLF89_3136	chromosome	-1.08	0.001	--		--	hypothetical protein
PSLF89_3386	chromosome	-1.08	0	ATP6	C	FoF1-type ATP synthase membrane subunit a	F0F1 ATP synthase subunit A	atpB F0F1 ATP synthase subunit A (EC:3.6.3.14) K02108 F-type H+-transporting ATPase subunit a		ATPase, F0 complex, subunit A	ATP synthase A chain
PSLF89_839	chromosome	-1.08	0.001	CSD	E	Selenocysteine lyase/Cysteine desulfurase	aminotransferase class-V family protein	csd cysteine desulfurase (EC:2.8.1.7)		Pyridoxal phosphate-dependent transferase, major region, subdomain 1	Aminotransferase class-V
PSLF89_2316	chromosome	-1.08	0.001	CYDA	C	Cytochrome bd-type quinol oxidase subunit 1	cytochrome d terminal oxidase subunit I	cytochrome d terminal oxidase subunit 1 K00425 cytochrome d ubiquinol oxidase subunit I [EC:1.10.3.-]			Bacterial Cytochrome Ubiquinol Oxidase
PSLF89_1300	chromosome	-1.08	0.012	IMDH	T	CBS domain	IMP dehydrogenase	guaB inosine-5'-monophosphate dehydrogenase K00088 IMP dehydrogenase [EC:1.1.1.205]		Aldolase-type TIM barrel	CBS domain;CBS domain;IMP dehydrogenase / GMP reductase domain
PSLF89_225	chromosome	-1.08	0.001	MAAI	O	Glutathione S-transferase	maleylacetoacetate isomerase	maleylacetoacetate isomerase		Thioredoxin-like fold	Glutathione S-transferase, C-terminal domain;Glutathione S-transferase, N-terminal domain
PSLF89_06650	chromosome	-1.08	0.002	PSEUDO		PSEUDO	PSEUDO
PSLF89_784	chromosome	-1.08	0.003	RUBR	C	Rubredoxin	rubredoxin	rubA rubredoxin		Rubredoxin-type fold	Rubredoxin
PSLF89_2815	chromosome	-1.08	0.002	TSAB	J	tRNA A37 threonylcarbamoyladenosine modification protein TsaB	tRNA (adenosine(37)-N6)-threonylcarbamoyltransferase complex dimerization subunit type 1 TsaB				Glycoprotease family
PSLF89_1762	chromosome	-1.08	0	YAJC	U	Preprotein translocase subunit YajC	preprotein translocase subunit YajC	preprotein translocase subunit YajC K03210 preprotein translocase subunit YajC			Preprotein translocase subunit
PSLF89_3114	chromosome	-1.09	0.022	--	U	Predicted component of the type VI protein secretion system	type VI secretion protein	hypothetical protein K11893 type VI secretion system protein ImpJ			Bacterial protein of unknown function (DUF876)
PSLF89_394	chromosome	-1.09	0.001	--	D	Cell division protein FtsN	SPOR domain-containing protein	sporulation-like protein		Sporulation-related domain	Sporulation related domain
PSLF89_3085	chromosome	-1.09	0.001	--	M	ABC-type transporter Mla maintaining outer membrane lipid asymmetry MlaB component contains STAS domain	hypothetical protein	sulfate transporter/antisigma-factor antagonist STAS K07122 phospholipid transport system transporter-binding protein		STAS domain	STAS domain
PSLF89_09110	pPSLF89-4	-1.09	0.001	--		--	hypothetical protein
PSLF89_3385	chromosome	-1.09	0.003	ATPL	C	FoF1-type ATP synthase membrane subunit c/Archaeal/vacuolar-type H+-ATPase subunit K	F0F1 ATP synthase subunit C	atpE ATP synthase subunit c K02110 F-type H+-transporting ATPase subunit c		ATPase, F0 complex, subunit C	ATP synthase subunit C
PSLF89_2042	chromosome	-1.09	0	PAND	H	Aspartate 1-decarboxylase	aspartate 1-decarboxylase	aspartate alpha-decarboxylase K01579 aspartate 1-decarboxylase [EC:4.1.1.11]	(gi:145222017) panD (Mflv_1425) - aspartate 1-decarboxylase [Mycobacterium gilvum str. PYR-GCK]		Aspartate decarboxylase
PSLF89_349	chromosome	-1.09	0.01	RS10	J	Ribosomal protein S10	30S ribosomal protein S10			Ribosomal protein S10 domain	Ribosomal protein S10p/S20e
PSLF89_103	chromosome	-1.09	0	TRPGD	EH	Anthranilate/para-aminobenzoate synthase component II	glutamine amidotransferase	glutamine amidotransferase K01658 anthranilate synthase component II [EC:4.1.3.27]			Glutamine amidotransferase class-I
PSLF89_1p101	pPSLF89-1	-1.09	0.001	VAPC2	R	Predicted nucleic acid-binding protein contains PIN domain	PIN domain nuclease	vapC2 toxin of toxin-antitoxin system K18828 tRNA(fMet)-specific endonuclease VapC [EC:3.1.-.-]			PIN domain
PSLF89_2605	chromosome	-1.09	0.001	YGFZ	O	Folate-binding Fe-S cluster repair protein YgfZ possible role in tRNA modification	hypothetical protein	aminomethyltransferase GcvT-like protein K06980			Glycine cleavage T-protein C-terminal barrel domain;Aminomethyltransferase folate-binding domain
PSLF89_2890	chromosome	-1.1	0.001	--	S	Uncharacterized integral membrane protein	hypothetical protein	hypothetical protein K08992 putative membrane protein			Protein of unknown function (DUF1049)
PSLF89_1091	chromosome	-1.1	0.001	--		--	hypothetical protein
PSLF89_1728	chromosome	-1.1	0	GALE	M	UDP-glucose 4-epimerase	UDP-glucose 4-epimerase		(gi:157415663) C8J_1344 - hypothetical protein [Campylobacter jejuni str. 81116 (NCTC11828)]	NAD(P)-binding domain	NAD dependent epimerase/dehydratase family;UDP-glucose 4-epimerase C-term subunit
PSLF89_3191	chromosome	-1.1	0.001	GLMM	G	Phosphomannomutase	phosphoglucosamine mutase	glmM phosphoglucosamine mutase (EC:5.4.2.10) K03431 phosphoglucosamine mutase [EC:5.4.2.10]	(gi:113460873) mrsA/glmM (HS_0730) - phosphoglucosamine mutase [Haemophilus somnus str. 129PT]	Alpha-D-phosphohexomutase, alpha/beta/alpha I/II/III	Phosphoglucomutase/phosphomannomutase, alpha/beta/alpha domain III;Phosphoglucomutase/phosphomannomutase, alpha/beta/alpha domain II;Phosphoglucomutase/phosphomannomutase, alpha/beta/alpha domain I;Phosphoglucomutase/phosphomannomutase, C-terminal domain
PSLF89_2165	chromosome	-1.1	0.001	HGD	Q	Homogentisate 12-dioxygenase	homogentisate 12-dioxygenase			RmlC-like jelly roll fold	homogentisate 1,2-dioxygenase
PSLF89_3159	chromosome	-1.1	0.002	HSLO	O	Redox-regulated molecular chaperone HSP33 family	hypothetical protein	Hsp33 protein K04083 molecular chaperone Hsp33		Heat shock protein Hsp33, C-terminal	Hsp33 protein
PSLF89_3253	chromosome	-1.1	0.001	LCFB	IQ	Acyl-CoA synthetase (AMP-forming)/AMP-acid ligase II	hypothetical protein	malonyl-CoA synthase K18661 malonyl-CoA/methylmalonyl-CoA synthetase [EC:6.2.1.-]			AMP-binding enzyme;AMP-binding enzyme C-terminal domain
PSLF89_666	chromosome	-1.1	0.001	NADE	R	Predicted amidohydrolase	NAD+ synthase	putative glutamine-dependent NAD(+) synthetase K01950 NAD+ synthase (glutamine-hydrolysing) [EC:6.3.5.1]		Carbon-nitrogen hydrolase	Carbon-nitrogen hydrolase;NAD synthase
PSLF89_2006	chromosome	-1.1	0	TRMD	J	tRNA G37 N-methylase TrmD	tRNA (guanosine(37)-N1)-methyltransferase TrmD				tRNA (Guanine-1)-methyltransferase
PSLF89_2510	chromosome	-1.1	0.001	YJCK	JO	Protein N-acetyltransferase RimJ/RimL family	hypothetical protein	GCN5-like N-acetyltransferase K03790 ribosomal-protein-alanine N-acetyltransferase [EC:2.3.1.128]		Acyl-CoA N-acyltransferase	Acetyltransferase (GNAT) domain
PSLF89_3305	chromosome	-1.11	0	DCUP	H	Uroporphyrinogen-III decarboxylase	uroporphyrinogen decarboxylase	uroporphyrinogen decarboxylase (EC:4.1.1.37) K01599 uroporphyrinogen decarboxylase [EC:4.1.1.37]	(gi:170718716) hemE (HSM_0564) - uroporphyrinogen decarboxylase [Haemophilus somnus str. 2336]		Uroporphyrinogen decarboxylase (URO-D)
PSLF89_489	chromosome	-1.11	0	KBL	H	7-keto-8-aminopelargonate synthetase or related enzyme	glycine C-acetyltransferase	2-amino-3-ketobutyrate coenzyme A ligase K00639 glycine C-acetyltransferase [EC:2.3.1.29]		Pyridoxal phosphate-dependent transferase, major region, subdomain 1	Aminotransferase class I and II
PSLF89_07995	chromosome	-1.11	0	PSEUDO		PSEUDO	PSEUDO
PSLF89_09105	pPSLF89-4	-1.11	0.003	TRAD1	U	Type IV secretory pathway VirD4 component TraG/TraD family ATPase	type IV conjugative transfer system coupling protein TraD	hypothetical protein			Type IV secretion-system coupling protein DNA-binding domain
PSLF89_2141	chromosome	-1.11	0	URK	F	Uridine kinase	uridine kinase				Phosphoribulokinase / Uridine kinase family
PSLF89_282	chromosome	-1.11	0.008	YPH4	QT	Polyhydroxyalkanoate (PHA) synthesis regulator protein binds DNA and PHA	polyhydroxyalkanoate synthesis repressor PhaR				PHB accumulation regulatory domain;PHB/PHA accumulation regulator DNA-binding domain
PSLF89_08215	pPSLF89-1	-1.12	0.001	--	X	Transposase and inactivated derivatives IS5 family	transposase	hypothetical protein			Transposase DDE domain
PSLF89_53	chromosome	-1.12	0.001	--		--	hypothetical protein
PSLF89_2917	chromosome	-1.12	0.001	CLPB	O	ATP-dependent Clp protease ATP-binding subunit ClpA	ATP-dependent chaperone ClpB	ATP-dependent chaperone ClpB K03695 ATP-dependent Clp protease ATP-binding subunit ClpB	(gi:229593390) clpV1 (PFLU6025) - chaperone [Pseudomonas fluorescens str. SBW25]		Clp amino terminal domain;Clp amino terminal domain;AAA domain (Cdc48 subfamily);ATPase family associated with various cellular activities (AAA);C-terminal, D2-small domain, of ClpB protein
PSLF89_683	chromosome	-1.12	0.001	RSMI	J	16S rRNA C1402 (ribose-2'-O) methylase RsmI	rRNA (cytidine-2'-O-)-methyltransferase	uroporphyrin-III C/tetrapyrrole methyltransferase K07056 16S rRNA (cytidine1402-2'-O)-methyltransferase [EC:2.1.1.198]		Tetrapyrrole methylase, subdomain 1	Tetrapyrrole (Corrin/Porphyrin) Methylases
PSLF89_07395	chromosome	-1.13	0	--		--	hypothetical protein
PSLF89_1409	chromosome	-1.13	0	--		--	hypothetical protein
PSLF89_2401	chromosome	-1.13	0.002	--		--	hypothetical protein	hypothetical protein			Domain of unknown function (DUF4280)
PSLF89_2964	chromosome	-1.13	0.001	--		--	hypothetical protein
PSLF89_485	chromosome	-1.13	0.001	--		--	hypothetical protein
PSLF89_3143	chromosome	-1.13	0.001	CORC	P	Mg2+ and Co2+ transporter CorC contains CBS pair and CorC-HlyC domains	ion transporter	Mg2+/Co2+ transporter K06189 magnesium and cobalt transporter	(gi:110799963) CPF_0439 - CBS/transporter associated domain protein [Clostridium perfringens str. ATCC 13124]		Transporter associated domain;CBS domain;CBS domain
PSLF89_1568	chromosome	-1.13	0.001	ISCS	E	Cysteine sulfinate desulfinase/cysteine desulfurase or related enzyme	IscS subfamily cysteine desulfurase	cysteine desulfurase IscS K04487 cysteine desulfurase [EC:2.8.1.7]		Pyridoxal phosphate-dependent transferase, major region, subdomain 1	Aminotransferase class-V
PSLF89_08700	pPSLF89-2	-1.13	0	PSEUDO		PSEUDO	PSEUDO
PSLF89_911	chromosome	-1.13	0	RS9	J	Ribosomal protein S9	30S ribosomal protein S9	30S ribosomal protein S9		Ribosomal protein S5 domain 2-type fold, subgroup	Ribosomal protein S9/S16
PSLF89_284	chromosome	-1.13	0.002	THIL	I	Acetyl-CoA acetyltransferase	hypothetical protein			Thiolase-like, subgroup	Thiolase, N-terminal domain;Thiolase, C-terminal domain
PSLF89_722	chromosome	-1.13	0.001	Y519	F	Nucleoside permease NupC	hypothetical protein	Na+ dependent nucleoside transporter K03317 concentrative nucleoside transporter, CNT family			Nucleoside recognition;Na+ dependent nucleoside transporter N-terminus;Na+ dependent nucleoside transporter C-terminus
PSLF89_07530	chromosome	-1.14	0	--		--	hypothetical protein
PSLF89_3382	chromosome	-1.14	0.002	ATPA	C	FoF1-type ATP synthase alpha subunit	ATP synthase subunit alpha	atpA F0F1 ATP synthase subunit alpha (EC:3.6.3.14) K02111 F-type H+-transporting ATPase subunit alpha [EC:3.6.3.14]	(gi:218892348) pscN (PLES_36301) - type III secretion system ATPase [Pseudomonas aeruginosa str. LESB58]		ATP synthase alpha/beta family, beta-barrel domain;ATP synthase alpha/beta chain, C terminal domain;ATP synthase alpha/beta family, nucleotide-binding domain
PSLF89_3358	chromosome	-1.14	0.002	DMPM	QR	Predicted transcriptional regulator contains HTH domain	hypothetical protein	O-methyltransferase 2			O-methyltransferase
PSLF89_324	chromosome	-1.14	0	GREA	K	Transcription elongation factor GreA/GreB family	transcription elongation factor GreA	transcription elongation factor GreA K03624 transcription elongation factor GreA		Transcription elongation factor, GreA/GreB, C-terminal	Transcription elongation factor, GreA/GreB, C-term;Transcription elongation factor, N-terminal
PSLF89_2516	chromosome	-1.14	0	HSD2	C	NADP-dependent 3-hydroxy acid dehydrogenase YdfG	SDR family oxidoreductase	serine 3-dehydrogenase (EC:1.1.1.276)		NAD(P)-binding domain	short chain dehydrogenase
PSLF89_07245	chromosome	-1.14	0	INSK	X	Transposase InsO and inactivated derivatives	integrase	Integrase catalytic subunit	(gi:82524546) ipaH2.5 (SDY_P140) - invasion plasmid antigen, fragment [Shigella dysenteriae str. 197 (serotype 1) plasmid pSD1_197]		Integrase core domain;HTH-like domain
PSLF89_3164	chromosome	-1.14	0.001	METN	E	ABC-type methionine transport system ATPase component	hypothetical protein	metN D-methionine transport ATP-binding protein K02071 D-methionine transport system ATP-binding protein	(gi:194097927) fbpC (NGK_0348) - Fe(3+) ions import ATP-binding protein fbpC [Neisseria gonorrhoeae str. NCCP11945]		NIL domain;ABC transporter
PSLF89_1411	chromosome	-1.14	0.001	NUC1	F	DNA/RNA endonuclease G NUC1	DNA/RNA non-specific endonuclease	DNA/RNA endonuclease G K01173 endonuclease G, mitochondrial		Extracellular Endonuclease, subunit A	DNA/RNA non-specific endonuclease
PSLF89_1253	chromosome	-1.14	0.008	SKP	MO	Periplasmic chaperone for outer membrane proteins Skp family	hypothetical protein	periplasmic chaperone K06142 outer membrane protein			Outer membrane protein (OmpH-like)
PSLF89_08360	pPSLF89-1	-1.15	0	--		--	hypothetical protein
PSLF89_2400	chromosome	-1.15	0	--		--	hypothetical protein			Pyruvate kinase, beta-barrel insert domain
PSLF89_68	chromosome	-1.15	0	DEF1	J	Peptide deformylase	peptide deformylase	def peptide deformylase (EC:3.5.1.88) K01462 peptide deformylase [EC:3.5.1.88]		Peptide deformylase	Polypeptide deformylase
PSLF89_3p38	pPSLF89-3	-1.15	0	YCAD	G	Predicted arabinose efflux permease MFS family	MFS transporter				Major Facilitator Superfamily
PSLF89_06525	chromosome	-1.16	0	--	X	Transposase InsO and inactivated derivatives	hypothetical protein	integrase			Integrase core domain
PSLF89_09070	pPSLF89-4	-1.16	0.001	--		--	hypothetical protein PSLF89_09070 (plasmid)
PSLF89_1p113	pPSLF89-1	-1.16	0.001	--		--	hypothetical protein
PSLF89_1p23	pPSLF89-1	-1.16	0	--		--	hypothetical protein K661_02347
PSLF89_2841	chromosome	-1.16	0.001	ASTA	E	Arginine/ornithine N-succinyltransferase beta subunit	hypothetical protein	arginine N-succinyltransferase K00673 arginine N-succinyltransferase [EC:2.3.1.109]			Arginine N-succinyltransferase beta subunit
PSLF89_1375	chromosome	-1.16	0	DACC	M	D-alanyl-D-alanine carboxypeptidase	D-alanyl-D-alanine carboxypeptidase	D-alanyl-D-alanine serine-type carboxypeptidase (EC:3.4.16.4) K07258 D-alanyl-D-alanine carboxypeptidase (penicillin-binding protein 5/6) [EC:3.4.16.4]		Beta-lactamase/transpeptidase-like	Penicillin-binding protein 5, C-terminal domain;D-alanyl-D-alanine carboxypeptidase
PSLF89_2615	chromosome	-1.16	0.002	E13H		--	glycosyl hydrolase family 17			Glycoside hydrolase, catalytic domain	Glycosyl hydrolases family 17
PSLF89_1092	chromosome	-1.16	0	MPL	M	UDP-N-acetylmuramate-alanine ligase	UDP-N-acetylmuramate:L-alanyl-gamma-D-glutamyl-meso-diaminopimelate ligase			Mur ligase, central	Mur ligase middle domain;Mur ligase family, glutamate ligase domain;Mur ligase family, catalytic domain
PSLF89_257	chromosome	-1.16	0	NUOB	C	NADH:ubiquinone oxidoreductase 20 kD subunit (chhain B) or related Fe-S oxidoreductase	NADH-quinone oxidoreductase B subunit			NADH:ubiquinone oxidoreductase-like, 20kDa subunit	NADH ubiquinone oxidoreductase, 20 Kd subunit
PSLF89_258	chromosome	-1.16	0	NUOC	C	NADH:ubiquinone oxidoreductase 27 kD subunit (chain C)	NADH-quinone oxidoreductase subunit C				Respiratory-chain NADH dehydrogenase, 30 Kd subunit
PSLF89_368	chromosome	-1.16	0.001	RS13	J	Ribosomal protein S13	30S ribosomal protein S13			30s ribosomal protein S13, C-terminal	Ribosomal protein S13/S18
PSLF89_49	chromosome	-1.16	0	RSME	J	16S rRNA U1498 N3-methylase RsmE	16S rRNA (uracil(1498)-N(3))-methyltransferase				RNA methyltransferase
PSLF89_1996	chromosome	-1.16	0.024	YFIY	P	ABC-type Fe3+-hydroxamate transport system periplasmic component	hypothetical protein		(gi:62391921) fagD (cg3404) - ABC-type cobalamin/Fe3+-siderophores transport system, secreted component [Corynebacterium glutamicum str. ATCC 13032 (Bielefeld)]		Periplasmic binding protein
PSLF89_1191	chromosome	-1.17	0	COAD	H	Phosphopantetheine adenylyltransferase	pantetheine-phosphate adenylyltransferase	coaD phosphopantetheine adenylyltransferase (EC:2.7.7.3) K00954 pantetheine-phosphate adenylyltransferase [EC:2.7.7.3]		Rossmann-like alpha/beta/alpha sandwich fold	Cytidylyltransferase
PSLF89_2127	chromosome	-1.17	0.001	ISCR	K	DNA-binding transcriptional regulator IscR family	SUF system Fe-S cluster assembly regulator			Winged helix-turn-helix DNA-binding domain	Transcriptional regulator
PSLF89_205	chromosome	-1.17	0	NORM	V	Na+-driven multidrug efflux pump	MATE family efflux transporter	multidrug transporter K03327 multidrug resistance protein, MATE family			MatE;MatE
PSLF89_868	chromosome	-1.17	0	SCOB	I	Acyl CoA:acetate/3-ketoacid CoA transferase beta subunit	succinyl-CoA--3-ketoacid-CoA transferase	3-oxoacid CoA-transferase subunit B K01029 3-oxoacid CoA-transferase subunit B [EC:2.8.3.5]			Coenzyme A transferase
PSLF89_969	chromosome	-1.18	0	--	S	Uncharacterized conserved protein YaiL DUF2058 family	hypothetical protein				Uncharacterized protein conserved in bacteria (DUF2058)
PSLF89_07180	chromosome	-1.18	0.001	--	X	Transposase and inactivated derivatives IS5 family	transposase	transposase, IS4
PSLF89_2p22	pPSLF89-2	-1.18	0.001	--	X	Predicted phage phi-C31 gp36 major capsid-like protein	major capsid protein				Phage capsid family
PSLF89_2180	chromosome	-1.18	0.007	--		--	hypothetical protein			Guanine-nucleotide dissociation stimulator CDC25	RasGEF domain
PSLF89_3282	chromosome	-1.18	0	GALE	M	Nucleoside-diphosphate-sugar epimerase	hypothetical protein	UDP-glucose 4-epimerase K01784 UDP-glucose 4-epimerase [EC:5.1.3.2]	(gi:218890650) PLES_19101 - wbpP [Pseudomonas aeruginosa str. LESB58]	NAD(P)-binding domain	NAD dependent epimerase/dehydratase family
PSLF89_07680	chromosome	-1.18	0	RL22	J	Ribosomal protein L22	50S ribosomal protein L22			Ribosomal protein L22/L17	Ribosomal protein L22p/L17e
PSLF89_2721	chromosome	-1.18	0.001	YEAC	R	MoxR-like ATPase	hypothetical protein				ATPase family associated with various cellular activities (AAA)
PSLF89_1419	chromosome	-1.19	0		O	--	hypothetical protein	protein-L-isoaspartate O-methyltransferase-like			Protein-L-isoaspartate(D-aspartate) O-methyltransferase (PCMT)
PSLF89_1p178	pPSLF89-1	-1.19	0	--	V	Antitoxin component of toxin-antitoxin stability system DNA-binding transcriptional repressor	prevent-host-death family protein	prevent-host-death protein		Type II toxin-antitoxin system, antitoxin Phd/YefM	Antitoxin of toxin-antitoxin stability system N-terminal
PSLF89_3279	chromosome	-1.19	0.001	--		--	hypothetical protein	hypothetical protein			Bacterial putative lipoprotein (DUF940)
PSLF89_598	chromosome	-1.19	0	--		--	hypothetical protein
PSLF89_2287	chromosome	-1.19	0.001	DEAD	L	Superfamily II DNA and RNA helicase	helicase conserved C-terminal domain protein	deaD-1 ATP-dependent RNA helicase DeaD K05592 ATP-dependent RNA helicase DeaD [EC:3.6.4.13]			Helicase conserved C-terminal domain;DEAD/DEAH box helicase;DbpA RNA binding domain
PSLF89_1945	chromosome	-1.19	0.002	GLRX2	O	Glutaredoxin 2	hypothetical protein			Thioredoxin-like fold	Glutaredoxin 2, C terminal domain;Glutathione S-transferase, N-terminal domain
PSLF89_3292	chromosome	-1.19	0	GTAB	M	UTP-glucose-1-phosphate uridylyltransferase	UTP--glucose-1-phosphate uridylyltransferase	galU UTP-glucose-1-phosphate uridylyltransferase (EC:2.7.7.9) K00963 UTP--glucose-1-phosphate uridylyltransferase [EC:2.7.7.9]	(gi:118480317) gtaB (BALH_4779) - UTP--glucose-1-phosphate uridylyltransferase [Bacillus thuringiensis str. Al Hakam]		Nucleotidyl transferase
PSLF89_3001	chromosome	-1.19	0	HEM1	H	Glutamyl-tRNA reductase	glutamyl-tRNA reductase	glutamyl-tRNA reductase K02492 glutamyl-tRNA reductase [EC:1.2.1.70]	(gi:170717508) hemA (HSM_1279) - Glutamyl-tRNA reductase [Haemophilus somnus str. 2336]	NAD(P)-binding domain	Glutamyl-tRNAGlu reductase, N-terminal domain;Shikimate / quinate 5-dehydrogenase;Glutamyl-tRNAGlu reductase, dimerisation domain
PSLF89_07325	chromosome	-1.19	0	INSK	X	Transposase and inactivated derivatives	hypothetical protein	TNPA transposase K07497 putative transposase			HTH-like domain;Integrase core domain
PSLF89_3142	chromosome	-1.19	0.001	LNT	M	Apolipoprotein N-acyltransferase	apolipoprotein N-acyltransferase	lnt apolipoprotein N-acyltransferase K03820 apolipoprotein N-acyltransferase [EC:2.3.1.-]		Carbon-nitrogen hydrolase	Carbon-nitrogen hydrolase
PSLF89_3086	chromosome	-1.19	0	MLAC	I	ABC-type transporter Mla maintaining outer membrane lipid asymmetry periplasmic MlaC component	hypothetical protein	toluene tolerance family protein K07323 phospholipid transport system substrate-binding protein		Toluene tolerance protein, alpha-helical	Toluene tolerance, Ttg2
PSLF89_07620	chromosome	-1.19	0	PSEUDO		PSEUDO	PSEUDO
PSLF89_03575	chromosome	-1.19	0	TAGD	M	Glycerol-3-phosphate cytidylyltransferase cytidylyltransferase family	glycerol-3-phosphate cytidylyltransferase	putative glycerol-3-phosphate cytidylyltransferase K00980 glycerol-3-phosphate cytidylyltransferase [EC:2.7.7.39]	(gi:153952428) hldE (JJD26997_0578) - D,D-heptose 1-phosphate adenosyltransferase/7-phosphate kinase [Campylobacter jejuni str. 269.97 (subsp. doylei)]	Rossmann-like alpha/beta/alpha sandwich fold	Cytidylyltransferase
PSLF89_670	chromosome	-1.2	0.001	DEOD	F	Purine-nucleoside phosphorylase	purine nucleoside phosphorylase	deoD purine nucleoside phosphorylase K03784 purine-nucleoside phosphorylase [EC:2.4.2.1]		Nucleoside phosphorylase domain	Phosphorylase superfamily
PSLF89_09225	pPSLF89-4	-1.2	0.007	GPH	C	Phosphoglycolate phosphatase HAD superfamily	hypothetical protein	HAD-superfamily hydrolase, subfamily IA, variant 1 K01091 phosphoglycolate phosphatase [EC:3.1.3.18]		HAD-like domain	Haloacid dehalogenase-like hydrolase
PSLF89_3145	chromosome	-1.2	0	PHOL	T	Phosphate starvation-inducible protein PhoH predicted ATPase	PhoH family protein	Phosphate starvation-inducible ATPase PhoH K06217 phosphate starvation-inducible protein PhoH and related proteins			PhoH-like protein
PSLF89_2444	chromosome	-1.2	0	QUEC	J	7-cyano-7-deazaguanine synthase (queuosine biosynthesis)	7-cyano-7-deazaguanine synthase	ExsB protein K06920 7-cyano-7-deazaguanine synthase [EC:6.3.4.20]		Rossmann-like alpha/beta/alpha sandwich fold	Queuosine biosynthesis protein QueC
PSLF89_2128	chromosome	-1.2	0.009	Y074	O	Fe-S cluster assembly scaffold protein SufB	Fe-S cluster assembly protein SufB				Uncharacterized protein family (UPF0051)
PSLF89_1105	chromosome	-1.2	0	YCIB	D	Intracellular septation protein A	intracellular septation protein A	ispZ intracellular septation protein K06190 intracellular septation protein			Intracellular septation protein A
PSLF89_03720	chromosome	-1.21	0.001	--	S	Uncharacterized conserved protein DUF1499 family	hypothetical protein	hypothetical protein			Protein of unknown function (DUF1499)
PSLF89_2p12	pPSLF89-2	-1.21	0.001	--		--	hypothetical protein PSLF89_2p12 (plasmid)
PSLF89_866	chromosome	-1.21	0.009	PSA	E	Aminopeptidase N	aminopeptidase N	pepN aminopeptidase N K01256 aminopeptidase N [EC:3.4.11.2]		Peptidase M1, alanyl aminopeptidase, C-terminal	Domain of unknown function (DUF3458);Peptidase family M1
PSLF89_07670	chromosome	-1.21	0.005	RL24	J	Ribosomal protein L24	50S ribosomal protein L24			Ribosomal protein L2 domain 2	KOW motif
PSLF89_984	chromosome	-1.21	0	RS20	J	Ribosomal protein S20	30S ribosomal protein S20			Ribosomal protein S20	Ribosomal protein S20
PSLF89_446	chromosome	-1.22	0	PHS	H	Pterin-4a-carbinolamine dehydratase	4a-hydroxytetrahydrobiopterin dehydratase	phhB pterin-4a-carbinolamine dehydratase PhhB (EC:4.2.1.96) K01724 4a-hydroxytetrahydrobiopterin dehydratase [EC:4.2.1.96]		Transcriptional coactivator/pterin dehydratase	Pterin 4 alpha carbinolamine dehydratase
PSLF89_3280	chromosome	-1.22	0	WCAJ	M	Sugar transferase involved in LPS biosynthesis (colanic teichoic acid)	undecaprenyl-phosphate glucose phosphotransferase	UDP-phosphate glucose phosphotransferase (EC:2.7.8.6) K03606 putative colanic acid biosysnthesis UDP-glucose lipid carrier transferase	(gi:27367928) cpsA (VV2_1582) - Sugar transferase involved in lipopolysaccharide synthesis [Vibrio vulnificus str. CMCP6 chromosome II]	NAD(P)-binding domain	Bacterial sugar transferase;CoA-binding domain
PSLF89_3243	chromosome	-1.23	0	--	T	HD-like signal output (HDOD) domain no enzymatic activity	hypothetical protein	hypothetical protein		Metal-dependent hydrolase HDOD	HDOD domain
PSLF89_2634	chromosome	-1.23	0.002	RS18	J	Ribosomal protein S18	30S ribosomal protein S18	rpsR 30S ribosomal protein S18 K02963 small subunit ribosomal protein S18		Ribosomal protein S18	Ribosomal protein S18
PSLF89_3235	chromosome	-1.23	0.009	SECB	U	Preprotein translocase subunit SecB	preprotein translocase subunit SecB	secB preprotein translocase subunit SecB K03071 preprotein translocase subunit SecB		Bacterial protein export chaperone SecB	Preprotein translocase subunit SecB
PSLF89_2129	chromosome	-1.23	0.002	SUFC	O	Fe-S cluster assembly ATPase SufC	ABC transporter ATP-binding protein				ABC transporter
PSLF89_2p9	pPSLF89-2	-1.24	0.001	--		--	hypothetical protein				YcfA-like protein
PSLF89_2875	chromosome	-1.24	0	GLYA1	E	Glycine/serine hydroxymethyltransferase	serine hydroxymethyltransferase	glyA serine hydroxymethyltransferase K00600 glycine hydroxymethyltransferase [EC:2.1.2.1]		Pyridoxal phosphate-dependent transferase, major region, subdomain 1	Serine hydroxymethyltransferase
PSLF89_283	chromosome	-1.24	0	PHAB	IQR	NAD(P)-dependent dehydrogenase short-chain alcohol dehydrogenase family	beta-ketoacyl-ACP reductase		(gi:25010702) cylG (gbs0646) - hypothetical protein [Streptococcus agalactiae str. NEM316 (serotype III)]	NAD(P)-binding domain	short chain dehydrogenase
PSLF89_1302	chromosome	-1.24	0.001	PSEUDO		PSEUDO	PSEUDO
PSLF89_355	chromosome	-1.24	0	RS3	J	Ribosomal protein S3	30S ribosomal protein S3			K homology domain-like, alpha/beta	KH domain;Ribosomal protein S3, C-terminal domain
PSLF89_366	chromosome	-1.24	0	SECY	U	Preprotein translocase subunit SecY	preprotein translocase subunit SecY			SecY subunit domain	SecY translocase
PSLF89_3283	chromosome	-1.24	0.001	Y1178	M	Glycosyltransferase involved in cell wall bisynthesis	group 1 glycosyl transferase	alpha-d-mannose-alpha(1-6)phosphatidyl myo-inositol monomannoside transferase			Glycosyl transferases group 1
PSLF89_2889	chromosome	-1.24	0.001	YBAV	L	DNA uptake protein ComE and related DNA-binding proteins	hypothetical protein	competence protein ComEA helix-hairpin-helix repeat-containing protein K02237 competence protein ComEA			Helix-hairpin-helix motif
PSLF89_2727	chromosome	-1.25	0	--		Tetratricopeptide (TPR) repeat	hypothetical protein AB894_09810				Oxygen tolerance
PSLF89_346	chromosome	-1.25	0.002	RS7	J	Ribosomal protein S7	30S ribosomal protein S7			Ribosomal protein S7 domain	Ribosomal protein S7p/S5e
PSLF89_1190	chromosome	-1.25	0	TAL	G	Transaldolase	transaldolase family protein	transaldolase (EC:2.2.1.2) K00616 transaldolase [EC:2.2.1.2]		Aldolase-type TIM barrel	Transaldolase
PSLF89_08025	chromosome	-1.26	0	--	X	Transposase and inactivated derivatives IS5 family	transposase				Transposase DDE domain
PSLF89_08780	pPSLF89-2	-1.26	0.001	--		--	hypothetical protein
PSLF89_1045	chromosome	-1.26	0	--		--	hypothetical protein
PSLF89_2282	chromosome	-1.26	0	--		--	hypothetical protein
PSLF89_1028	chromosome	-1.26	0.001	ALF	G	Fructose/tagatose bisphosphate aldolase	fructose-16-bisphosphate aldolase			Aldolase-type TIM barrel	Fructose-bisphosphate aldolase class-II
PSLF89_945	chromosome	-1.26	0	RL20	J	Ribosomal protein L20	50S ribosomal protein L20				Ribosomal protein L20
PSLF89_08010	chromosome	-1.27	0	--		--	hypothetical protein
PSLF89_2820	chromosome	-1.27	0	XANB	G	Mannose-1-phosphate guanylyltransferase	cupin domain protein	cpsB mannose-1-phosphate guanyltransferase (EC:2.7.7.13)	(gi:66044305) algA (Psyr_1052) - Mannose-1-phosphate guanylyltransferase/mannose-6-phosphate isomerase [Pseudomonas syringae str. B728a (pv. syringae)]	RmlC-like jelly roll fold	Mannose-6-phosphate isomerase
PSLF89_3111	chromosome	-1.28	0.001	--		Uncharacterized protein YjbI contains pentapeptide repeats	hypothetical protein				Pentapeptide repeats (9 copies);Pentapeptide repeats (9 copies);Pentapeptide repeats (9 copies)
PSLF89_2273	chromosome	-1.28	0	--		--	hypothetical protein
PSLF89_348	chromosome	-1.28	0.003	EFTU	J	Translation elongation factor EF-Tu a GTPase	translation elongation factor Tu		(gi:26553484) tuf (MYPE320) - elongation factor Tu [Mycoplasma penetrans str. HF-2]		Elongation factor Tu GTP binding domain;Elongation factor Tu domain 2;Elongation factor Tu C-terminal domain
PSLF89_04725	chromosome	-1.29	0	--		--	hypothetical protein
PSLF89_826	chromosome	-1.29	0.015	--		--	hypothetical protein
PSLF89_281	chromosome	-1.3	0.001	--		--	hypothetical protein				Phasin protein
PSLF89_1008	chromosome	-1.3	0.001	HOPW1		--	hypothetical protein
PSLF89_338	chromosome	-1.3	0	NUSG	K	Transcription antitermination factor NusG	transcription termination/antitermination protein NusG			Transcription antitermination protein NusG, N-terminal domain	KOW motif;Transcription termination factor nusG
PSLF89_913	chromosome	-1.3	0.001	SSPB	R	Stringent starvation protein B	stringent starvation B family protein	sspB ClpXP protease specificity-enhancing factor K03600 stringent starvation protein B		Stringent starvation protein B	Stringent starvation protein B
PSLF89_3229	chromosome	-1.31	0	--		--	hypothetical protein
PSLF89_2848	chromosome	-1.31	0	RPOZ	K	DNA-directed RNA polymerase subunit K/omega	DNA-directed RNA polymerase subunit omega	rpoZ DNA-directed RNA polymerase subunit omega K03060 DNA-directed RNA polymerase subunit omega [EC:2.7.7.6]		RNA polymerase subunit, RPB6/omega	RNA polymerase Rpb6
PSLF89_2226	chromosome	-1.32	0	--		--	hypothetical protein
PSLF89_3020	chromosome	-1.32	0	--		--	ATP-dependent protease
PSLF89_04150	chromosome	-1.34	0	INSG	X	IS4 transposase	hypothetical protein				Transposase DDE domain
PSLF89_1724	chromosome	-1.35	0	--		--	hypothetical protein				YHYH protein
PSLF89_2643	chromosome	-1.35	0	AROF	E	3-deoxy-D-arabino-heptulosonate 7-phosphate (DAHP) synthase	3-deoxy-7-phosphoheptulonate synthase	phospho-2-dehydro-3-deoxyheptonate aldolase (EC:2.5.1.54) K03856 3-deoxy-7-phosphoheptulonate synthase [EC:2.5.1.54]		Aldolase-type TIM barrel	DAHP synthetase I family
PSLF89_363	chromosome	-1.35	0.001	RL18	J	Ribosomal protein L18	50S ribosomal protein L18				Ribosomal L18p/L5e family
PSLF89_30	chromosome	-1.35	0	YQKA	R	GrpB domain predicted nucleotidyltransferase UPF0157 family	hypothetical protein				GrpB protein
PSLF89_276	chromosome	-1.36	0	RS15	J	Ribosomal protein S15P/S13E	30S ribosomal protein S15			S15/NS1, RNA-binding	Ribosomal protein S15
PSLF89_1024	chromosome	-1.37	0	TKT1	G	Transketolase	transketolase				Transketolase, C-terminal domain;Transketolase, thiamine diphosphate binding domain;Transketolase, pyrimidine binding domain
PSLF89_09190	pPSLF89-4	-1.38	0	TRAE		--	hypothetical protein	putative conjugative transfer protein TraE K12067 conjugal transfer pilus assembly protein TraE			TraE protein
PSLF89_3112	chromosome	-1.39	0.003	--	S	Uncharacterized protein	hypothetical protein	Pentapeptide repeat protein			Uncharacterized protein conserved in bacteria (DUF2169)
PSLF89_2402	chromosome	-1.39	0	--		Predicted component of the type VI protein secretion system	hypothetical protein AB894_04795	hypothetical protein
PSLF89_3285	chromosome	-1.39	0.001	--		--	hypothetical protein
PSLF89_1318	chromosome	-1.39	0	EMRA	V	Multidrug resistance efflux pump	MFP transporter	multidrug resistance protein A K03543 multidrug resistance protein A			HlyD family secretion protein
PSLF89_922	chromosome	-1.39	0	MCPG	NT	Methyl-accepting chemotaxis protein	methyl-accepting chemotaxis (MCP) signaling domain protein	mcp40H-5 methyl-accepting chemotaxis sensory transducer, class 40H, Cache_2 domain-containing K03406 methyl-accepting chemotaxis protein			Methyl-accepting chemotaxis protein (MCP) signalling domain;HAMP domain
PSLF89_345	chromosome	-1.39	0.003	RS12	J	Ribosomal protein S12	30S ribosomal protein S12			Nucleic acid-binding, OB-fold	Ribosomal protein S12/S23
PSLF89_2788	chromosome	-1.39	0	YA00	O	Sulfur transfer protein SufE Fe-S center assembly	hypothetical protein				Fe-S metabolism associated domain
PSLF89_2p10	pPSLF89-2	-1.4	0	--	R	Predicted nuclease of the RNAse H fold HicB family	toxin-antitoxin system HicB family antitoxin				HicB family
PSLF89_3028	chromosome	-1.4	0	GCST	E	Glycine cleavage system T protein (aminomethyltransferase)	glycine cleavage system protein T	gcvT glycine cleavage system aminomethyltransferase T (EC:2.1.2.10) K00605 aminomethyltransferase [EC:2.1.2.10]			Aminomethyltransferase folate-binding domain;Glycine cleavage T-protein C-terminal barrel domain
PSLF89_361	chromosome	-1.4	0.004	RS8	J	Ribosomal protein S8	30S ribosomal protein S8				Ribosomal protein S8
PSLF89_2004	chromosome	-1.41	0	RS16	J	Ribosomal protein S16	30S ribosomal protein S16			Ribosomal protein S16 domain	Ribosomal protein S16
PSLF89_395	chromosome	-1.42	0.001	HSLV	O	ATP-dependent protease HslVU (ClpYQ) peptidase subunit	ATP-dependent protease subunit HslV	hslV ATP-dependent protease K01419 ATP-dependent HslUV protease, peptidase subunit HslV [EC:3.4.25.2]			Proteasome subunit
PSLF89_275	chromosome	-1.42	0	TRUB	J	tRNA U55 pseudouridine synthase TruB may also work on U342 of tmRNA	tRNA pseudouridine(55) synthase TruB			PUA-like domain	Pseudouridine synthase II TruB, C-terminal;TruB family pseudouridylate synthase (N terminal domain)
PSLF89_353	chromosome	-1.43	0	RL2	J	Ribosomal protein L2	50S ribosomal protein L2			Ribosomal protein L2, domain 3	Ribosomal Proteins L2, C-terminal domain;Ribosomal Proteins L2, RNA binding domain
PSLF89_351	chromosome	-1.43	0	RL4	J	Ribosomal protein L4	50S ribosomal protein L4			Ribosomal protein L4 domain	Ribosomal protein L4/L1 family
PSLF89_347	chromosome	-1.44	0.003	EFG	J	Translation elongation factor EF-G a GTPase	elongation factor G		(gi:71894677) tuf (MS53_0667) - Elongation factor Tu [Mycoplasma synoviae str. 53]		Elongation factor Tu domain 2;Elongation factor G, domain IV;Elongation factor Tu GTP binding domain;Elongation Factor G, domain II;Elongation factor G C-terminus
PSLF89_2387	chromosome	-1.44	0.001	Y894	MV	Multidrug efflux pump subunit AcrA (membrane-fusion protein)	MexH family multidrug efflux RND transporter periplasmic adaptor subunit	hemolysin D K03585 membrane fusion protein			HlyD family secretion protein
PSLF89_1765	chromosome	-1.45	0	--		--	hypothetical protein	putative conserved protein
PSLF89_818	chromosome	-1.45	0	--		--	hypothetical protein
PSLF89_1239	chromosome	-1.45	0.002	EFTS	J	Translation elongation factor EF-Ts	elongation factor Ts			Translation elongation factor EFTs/EF1B, dimerisation	UBA/TS-N domain;Elongation factor TS
PSLF89_2894	chromosome	-1.45	0	GYRA	L	DNA gyrase/topoisomerase IV subunit A	DNA gyrase subunit A	gyrA DNA gyrase subunit A (EC:5.99.1.3) K02469 DNA gyrase subunit A [EC:5.99.1.3]		DNA topoisomerase, type IIA, subunit A/ C-terminal, alpha-beta	DNA gyrase C-terminal domain, beta-propeller;DNA gyrase C-terminal domain, beta-propeller;DNA gyrase C-terminal domain, beta-propeller;DNA gyrase C-terminal domain, beta-propeller;DNA gyrase C-terminal domain, beta-propeller;DNA gyrase C-terminal domain,
PSLF89_3184	chromosome	-1.46	0.001	CH10	O	Co-chaperonin GroES (HSP10)	molecular chaperone GroES	groES chaperonin, 10 kDa K04078 chaperonin GroES		Chaperonin Cpn10	Chaperonin 10 Kd subunit
PSLF89_360	chromosome	-1.46	0.003	RS14	J	Ribosomal protein S14	30S ribosomal protein S14				Ribosomal protein S14p/S29e
PSLF89_254	chromosome	-1.46	0	SECG	U	Preprotein translocase subunit SecG	preprotein translocase subunit SecG				Preprotein translocase SecG subunit
PSLF89_912	chromosome	-1.46	0.001	SSPA	O	Glutathione S-transferase	stringent starvation protein A	sspA stringent starvation protein A K03599 RNA polymerase-associated protein		Thioredoxin-like fold	Glutathione S-transferase, N-terminal domain;Glutathione S-transferase, C-terminal domain
PSLF89_2091	chromosome	-1.47	0	DHAS	E	Aspartate-semialdehyde dehydrogenase	aspartate-semialdehyde dehydrogenase	aspartate-semialdehyde dehydrogenase (EC:1.2.1.11) K00133 aspartate-semialdehyde dehydrogenase [EC:1.2.1.11]			Semialdehyde dehydrogenase, NAD binding domain;Semialdehyde dehydrogenase, dimerisation domain
PSLF89_352	chromosome	-1.47	0.001	RL23	J	Ribosomal protein L23	50S ribosomal protein L23			Nucleotide-binding, alpha-beta plait	Ribosomal protein L23
PSLF89_2213	chromosome	-1.48	0	HEMH	H	Protoheme ferro-lyase (ferrochelatase)	ferrochelatase	hemH_[H] Ferrochelatase, protoheme ferro-lyase (EC:4.99.1.1) K01772 ferrochelatase [EC:4.99.1.1]	(gi:16273084) hemH (HI1160) - ferrochelatase [Haemophilus influenzae str. Rd KW20 (serotype d)]		Ferrochelatase
PSLF89_256	chromosome	-1.48	0	NUOA	C	NADH:ubiquinone oxidoreductase subunit 3 (chain A)	NADH-ubiquinone/plastoquinone oxidoreductase chain 3				NADH-ubiquinone/plastoquinone oxidoreductase, chain 3
PSLF89_1429	chromosome	-1.51	0			--	hypothetical protein
PSLF89_2936	chromosome	-1.51	0.001	--		Heme-degrading monooxygenase HmoA and related ABM domain proteins	DUF4937 domain-containing protein
PSLF89_2315	chromosome	-1.51	0	CYDB	C	Cytochrome bd-type quinol oxidase subunit 2	cytochrome d ubiquinol oxidase subunit II	cydB cytochrome d ubiquinol oxidase, subunit II K00426 cytochrome d ubiquinol oxidase subunit II [EC:1.10.3.-]			Cytochrome oxidase subunit II
PSLF89_354	chromosome	-1.51	0	RS19	J	Ribosomal protein S19	30S ribosomal protein S19			Ribosomal protein S19, superfamily	Ribosomal protein S19
PSLF89_67	chromosome	-1.54	0	DPRA	L	Predicted Rossmann fold nucleotide-binding protein DprA/Smf involved in DNA uptake	DNA processing protein DprA	DNA protecting protein DprA K04096 DNA processing protein			DNA recombination-mediator protein A
PSLF89_848	chromosome	-1.55	0	--	U	Zn-binding Pro-Ala-Ala-Arg (PAAR) domain incolved in TypeVI secretion	PAAR motif family protein	hypothetical protein			PAAR motif;PAAR motif
PSLF89_06800	chromosome	-1.55	0	--		--	membrane protein
PSLF89_3287	chromosome	-1.55	0	TARF	MI	CDP-glycerol glycerophosphotransferase TagB/SpsB family	glycerophosphotransferase	CDP-glycerol:poly(glycerophosphate)glycerophosphotransferase	(gi:29376985) cpsC (EF2493) - teichoic acid biosynthesis protein, putative [Enterococcus faecalis str. V583]		CDP-Glycerol:Poly(glycerophosphate) glycerophosphotransferase
PSLF89_31	chromosome	-1.58	0	FER2	C	(2Fe-2S) ferredoxin	hypothetical protein			Thioredoxin-like fold
PSLF89_08695	pPSLF89-2	-1.59	0			--	hypothetical protein
PSLF89_3345	chromosome	-1.61	0	--	E	5-carboxymethyl-2-hydroxymuconate isomerase	hypothetical protein	hypothetical protein
PSLF89_07535	chromosome	-1.61	0	--		--	hypothetical protein
PSLF89_358	chromosome	-1.61	0.001	RL14	J	Ribosomal protein L14	50S ribosomal protein L14			Ribosomal protein L14 domain	Ribosomal protein L14p/L23e
PSLF89_1238	chromosome	-1.62	0.001	RS2	J	Ribosomal protein S2	30S ribosomal protein S2				Ribosomal protein S2
PSLF89_2562	chromosome	-1.66	0.048	PPIB	O	Peptidyl-prolyl cis-trans isomerase (rotamase) - cyclophilin family	peptidyl-prolyl cis-trans isomerase		(gi:15900665) slrA (SP_0771) - peptidyl-prolyl cis-trans isomerase, cyclophilin-type [Streptococcus pneumoniae str. TIGR4 (serotype 4)]		Cyclophilin type peptidyl-prolyl cis-trans isomerase/CLD
PSLF89_2318	chromosome	-1.67	0.05	ADS1	I	Fatty-acid desaturase	hypothetical protein	fatty acid desaturase K00507 stearoyl-CoA desaturase (delta-9 desaturase) [EC:1.14.19.1]			Transposase;Fatty acid desaturase
PSLF89_2182	chromosome	-1.68	0.001	--	E	Chorismate mutase	hypothetical protein	chorismate mutase K04093 chorismate mutase [EC:5.4.99.5]		Chorismate mutase	Chorismate mutase type II
PSLF89_1015	chromosome	-1.68	0	Y4AS	KR	N-acetyltransferase GNAT superfamily (includes histone acetyltransferase HPA2)	N-acetyltransferase			Acyl-CoA N-acyltransferase	Acetyltransferase (GNAT) domain
PSLF89_1161	chromosome	-1.69	0	UDG	M	UDP-glucose 6-dehydrogenase	nucleotide sugar dehydrogenase	UDP-glucose 6-dehydrogenase (EC:1.1.1.22) K00012 UDPglucose 6-dehydrogenase [EC:1.1.1.22]	(gi:118480312) ugd (BALH_4773) - UDP-glucose 6-dehydrogenase [Bacillus thuringiensis str. Al Hakam]	NAD(P)-binding domain	UDP-glucose/GDP-mannose dehydrogenase family, NAD binding domain;UDP-glucose/GDP-mannose dehydrogenase family, central domain;UDP-glucose/GDP-mannose dehydrogenase family, UDP binding domain
PSLF89_539	chromosome	-1.7	0	--		--	hypothetical protein				Domain of unknown function (DUF4402)
PSLF89_09230	pPSLF89-4	-1.74	0.039	--	R	DNA-binding response regulator NarL/FixJ family contains REC and HTH domains	hypothetical protein	hypothetical protein			Bacterial regulatory proteins, luxR family;SnoaL-like polyketide cyclase
PSLF89_07430	chromosome	-1.75	0.048	--		--	hypothetical protein
PSLF89_1044	chromosome	-1.75	0	MDMC	R	Predicted O-methyltransferase YrrM	hypothetical protein				O-methyltransferase
PSLF89_3276	chromosome	-1.75	0.038	RPOH	K	DNA-directed RNA polymerase sigma subunit (sigma70/sigma32)	RNA polymerase sigma factor RpoH	rpoH RNA polymerase factor sigma-32 K03089 RNA polymerase sigma-32 factor	(gi:54297202) rpoS (lpp1247) - RNA polymerase sigma factor RpoS [Legionella pneumophila str. Paris]	Winged helix-turn-helix DNA-binding domain	Sigma-70, region 4;Sigma-70 region 2;Sigma-70 factor, region 1.2
PSLF89_09180	pPSLF89-4	-1.76	0	TRAB1	NW	Tfp pilus assembly protein FimV	hypothetical protein	Conjugative transfer protein TraB K12065 conjugal transfer pilus assembly protein TraB			Bacterial conjugation TrbI-like protein
PSLF89_1976	chromosome	-1.77	0	HFLC	O	Regulator of protease activity HflC stomatin/prohibitin superfamily	protease modulator HflC	protein HflC K04087 membrane protease subunit HflC [EC:3.4.-.-]			SPFH domain / Band 7 family
PSLF89_04980	chromosome	-1.78	0	IF1	J	Translation initiation factor IF-1	translation initiation factor IF-1	infA translation initiation factor IF-1 K02518 translation initiation factor IF-1		Nucleic acid-binding, OB-fold	Translation initiation factor 1A / IF-1
PSLF89_2879	chromosome	-1.79	0.035	--	H	Ubiquinone/menaquinone biosynthesis C-methylase UbiE	hypothetical protein	hypothetical protein			Methyltransferase domain
PSLF89_2427	chromosome	-1.79	0.04	--	U	Predicted component of the type VI protein secretion system	type VI secretion protein	hypothetical protein K11901 type VI secretion system protein ImpB			Protein of unknown function (DUF770)
PSLF89_03765	chromosome	-1.79	0	--		--	hypothetical protein
PSLF89_2443	chromosome	-1.79	0.049	SODF	P	Superoxide dismutase	superoxide dismutase	superoxide dismutase (EC:1.15.1.1) K04564 superoxide dismutase, Fe-Mn family [EC:1.15.1.1]	(gi:118469767) sodA (MSMEG_6427) - [Mn] superoxide dismutase [Mycobacterium smegmatis str. MC2 155]		Iron/manganese superoxide dismutases, C-terminal domain;Iron/manganese superoxide dismutases, alpha-hairpin domain
PSLF89_2261	chromosome	-1.79	0	SSB	L	Single-stranded DNA-binding protein	single-stranded DNA-binding protein	ssDNA-binding protein K03111 single-strand DNA-binding protein		Nucleic acid-binding, OB-fold	Single-strand binding protein family
PSLF89_725	chromosome	-1.8	0.049	DCTA	C	Na+/H+-dicarboxylate symporter	dicarboxylate/amino acid:cation symporter	sodium:dicarboxylate symporter			Sodium:dicarboxylate symporter family
PSLF89_3162	chromosome	-1.8	0.001	METQ	P	ABC-type metal ion transport system periplasmic component/surface antigen	hypothetical protein	D-methionine ABC transporter periplasmic D-methionine-binding protein K02073 D-methionine transport system substrate-binding protein			NLPA lipoprotein
PSLF89_2063	chromosome	-1.8	0	USPA1	T	Nucleotide-binding universal stress protein UspA family	universal stress family protein	uspA Universal stress protein A-like protein 2 K06149 universal stress protein A		Rossmann-like alpha/beta/alpha sandwich fold	Universal stress protein family
PSLF89_705	chromosome	-1.83	0	TRMH	J	tRNA G18 (ribose-2'-O)-methylase SpoU	tRNA (guanosine-2'-O)-methyltransferase	tRNA guanosine-2'-O-methyltransferase (EC:2.1.1.34) K00556 tRNA (guanosine-2'-O-)-methyltransferase [EC:2.1.1.34]			SpoU rRNA Methylase family;SpoU, rRNA methylase, C-terminal
PSLF89_08035	chromosome	-1.84	0			--	hypothetical protein
PSLF89_584	chromosome	-1.84	0.039	--	P	Copper(I)-binding protein	hypothetical protein	Copper metallochaperone K09796 hypothetical protein			Protein of unknown function (DUF461)
PSLF89_2840	chromosome	-1.85	0	ASTD	C	Acyl-CoA reductase or other NAD-dependent aldehyde dehydrogenase	N-succinylglutamate 5-semialdehyde dehydrogenase	astD N-succinylglutamate 5-semialdehyde dehydrogenase K06447 succinylglutamic semialdehyde dehydrogenase [EC:1.2.1.71]		Aldehyde dehydrogenase, N-terminal	Aldehyde dehydrogenase family
PSLF89_2648	chromosome	-1.85	0	S39A2	P	Zinc transporter ZupT	hypothetical protein	zinc (Zn2+)-iron (Fe2+) permease (ZIP) family protein			ZIP Zinc transporter
PSLF89_09115	pPSLF89-4	-1.85	0.033	TRAT		--	hypothetical protein	traT-like protein			Enterobacterial TraT complement resistance protein
PSLF89_752	chromosome	-1.86	0	GPH	C	Phosphoglycolate phosphatase HAD superfamily	hypothetical protein	phosphoglycolate phosphatase (EC:3.1.3.18) K01091 phosphoglycolate phosphatase [EC:3.1.3.18]		HAD-like domain	Haloacid dehalogenase-like hydrolase
PSLF89_550	chromosome	-1.86	0.001	RIBN	GER	Permease of the drug/metabolite transporter (DMT) superfamily	EamA family transporter				EamA-like transporter family;EamA-like transporter family
PSLF89_359	chromosome	-1.87	0.001	RL5	J	Ribosomal protein L5	50S ribosomal protein L5			Ribosomal protein L5 domain	ribosomal L5P family C-terminus;Ribosomal protein L5
PSLF89_740	chromosome	-1.88	0.031	--		--	hypothetical protein
PSLF89_2288	chromosome	-1.88	0.03	TCYP	E	L-cystine uptake protein TcyP sodium:dicarboxylate symporter family	sodium:dicarboxylate symporter	sodium:dicarboxylate symporter family protein K06956			Sodium:dicarboxylate symporter family
PSLF89_2p18	pPSLF89-2	-1.89	0	--		--	hypothetical protein
PSLF89_2092	chromosome	-1.91	0.031	LGUL	Q	Catechol 23-dioxygenase or other lactoylglutathione lyase family enzyme	lactoylglutathione lyase	gloA glyoxalase I, nickel isomerase (lactoylglutathione lyase) (EC:4.4.1.5) K01759 lactoylglutathione lyase [EC:4.4.1.5]			Glyoxalase/Bleomycin resistance protein/Dioxygenase superfamily
PSLF89_03400	chromosome	-1.93	0.031	RNPA	J	RNase P protein component	ribonuclease P protein component	ribonuclease P protein component K03536 ribonuclease P protein component [EC:3.1.26.5]		Ribosomal protein S5 domain 2-type fold, subgroup	Ribonuclease P
PSLF89_3273	chromosome	-1.94	0.032	CPXR	TK	DNA-binding response regulator OmpR family contains REC and winged-helix (wHTH) domain	DNA-binding response regulator	winged helix family two component transcriptional regulator	(gi:387874359) mprA (W7S_04765) - two component response transcriptional regulatory protein MprA [Mycobacterium intracellulare str. MOTT36Y]		Transcriptional regulatory protein, C terminal;Response regulator receiver domain
PSLF89_2045	chromosome	-1.94	0.037	ENO	G	Enolase	enolase	enolase (EC:4.2.1.11) K01689 enolase [EC:4.2.1.11]	(gi:125717729) eno (SSA_0886) - Enolase, putative [Streptococcus sanguinis str. SK36]		Enolase, N-terminal domain;Enolase, C-terminal TIM barrel domain
PSLF89_207	chromosome	-1.97	0	RL33	J	Ribosomal protein L33	50S ribosomal protein L33	rpmG 50S ribosomal protein L33 K02913 large subunit ribosomal protein L33			Ribosomal protein L33
PSLF89_1314	chromosome	-1.98	0	--	L	Bacterial nucleoid DNA-binding protein	hypothetical protein PSLF89_1314	bph2_2 DNA-binding protein
PSLF89_893	chromosome	-1.98	0.031	CISY	C	Citrate synthase	type II citrate synthase	citrate synthase (EC:2.3.3.1) K01647 citrate synthase [EC:2.3.3.1]		Citrate synthase-like, small alpha subdomain	Citrate synthase
PSLF89_170	chromosome	-1.99	0.029	--	R	Ketosteroid isomerase homolog	isochorismatase	isochorismatase
PSLF89_3296	chromosome	-2	0.033	--	I	Membrane-associated phospholipid phosphatase	phosphatase PAP2 family protein	phosphoesterase, PAP2 family		Phosphatidic acid phosphatase type 2/haloperoxidase	PAP2 superfamily
PSLF89_3248	chromosome	-2	0.028	--		--	membrane protein	hypothetical protein
PSLF89_594	chromosome	-2.02	0	HSPH	O	Molecular chaperone IbpA HSP20 family	hypothetical protein	ibpA molecular chaperone (16 kDa) heat shock protein A K04080 molecular chaperone IbpA			Hsp20/alpha crystallin family
PSLF89_92	chromosome	-2.04	0.046	--		--	hypothetical protein
PSLF89_869	chromosome	-2.04	0.026	SCOA	I	Acyl CoA:acetate/3-ketoacid CoA transferase alpha subunit	succinyl-CoA--3-ketoacid-CoA transferase	3-oxoacid CoA-transferase subunit A (EC:2.8.3.5) K01028 3-oxoacid CoA-transferase subunit A [EC:2.8.3.5]			Coenzyme A transferase
PSLF89_1p22	pPSLF89-1	-2.04	0.001	SOJ	N	Cellulose biosynthesis protein BcsQ	hypothetical protein	Cobyrinic acid ac-diamide synthase K03496 chromosome partitioning protein			CobQ/CobB/MinD/ParA nucleotide binding domain
PSLF89_06495	chromosome	-2.05	0	RS6	J	Ribosomal protein S6	30S ribosomal protein S6	rpsF 30S ribosomal protein S6 K02990 small subunit ribosomal protein S6		Translation elongation factor EF1B/ribosomal protein S6	Ribosomal protein S6
PSLF89_1025	chromosome	-2.08	0.04	G3PC	G	Glyceraldehyde-3-phosphate dehydrogenase/erythrose-4-phosphate dehydrogenase	type I glyceraldehyde-3-phosphate dehydrogenase		(gi:15674453) plr/gapA (SPy0274) - glyceraldehyde-3-phosphate dehydrogenase [Streptococcus pyogenes str. SF370 (serotype M1)]		Glyceraldehyde 3-phosphate dehydrogenase, C-terminal domain;Glyceraldehyde 3-phosphate dehydrogenase, NAD binding domain
PSLF89_05770	chromosome	-2.09	0.038	--		--	hypothetical protein
PSLF89_2918	chromosome	-2.09	0.027	PLD	I	Phosphatidylserine/phosphatidylglycerophosphate/cardiolipin synthase or related enzyme	PLD-like domain protein	Putative endonuclease			PLD-like domain
PSLF89_3215	chromosome	-2.11	0.021	--		--	hypothetical protein
PSLF89_93	chromosome	-2.14	0.038	--		--	hypothetical protein
PSLF89_2281	chromosome	-2.14	0.033	Y2319	R	Predicted sulfurtransferase	hypothetical protein	rhodanese domain-containing protein K07146 UPF0176 protein		Rhodanese-like domain	Rhodanese-like domain
PSLF89_1240	chromosome	-2.15	0.019	PYRH	F	Uridylate kinase	UMP kinase			Aspartate/glutamate/uridylate kinase	Amino acid kinase family
PSLF89_3290	chromosome	-2.15	0.031	RMLB	M	dTDP-D-glucose 46-dehydratase	dTDP-glucose 46-dehydratase	dTDP-glucose 4,6-dehydratase (EC:4.2.1.46) K01710 dTDP-glucose 4,6-dehydratase [EC:4.2.1.46]	(gi:59710773) rmlB (VF0166) - dTDP-glucose 4,6-dehydratase [Vibrio fischeri str. ES114 chromosome I]	NAD(P)-binding domain	NAD dependent epimerase/dehydratase family
PSLF89_36	chromosome	-2.16	0.037	--	O	Cysteine protease C1A family	hypothetical protein
PSLF89_817	chromosome	-2.17	0.02	LYSP	E	Amino acid permease	amino acid permease	lysine-specific permease K11733 lysine-specific permease			Amino acid permease
PSLF89_3252	chromosome	-2.18	0	Y937		--	hypothetical protein
PSLF89_1992	chromosome	-2.19	0	Y1022	U	Biopolymer transport protein ExbB/TolQ	hypothetical protein				MotA/TolQ/ExbB proton channel family
PSLF89_3274	chromosome	-2.2	0.025	DEGPL	O	Periplasmic serine protease S1-C subfamily contain C-terminal PDZ domain	trypsin family protein	PDZ domain family protein	(gi:170720094) algW (PputW619_0908) - 2-alkenal reductase [Pseudomonas putida str. W619]		PDZ domain;Trypsin-like peptidase domain
PSLF89_3293	chromosome	-2.2	0.014	EPSB	M	Uncharacterized protein involved in exopolysaccharide biosynthesis	capsular biosynthesis protein	exopolysaccharide transport family protein K16692 tyrosine-protein kinase Etk/Wzc [EC:2.7.10.-]	(gi:59710772) wzc (VF0165) - chain length regulator (capsular polysaccharide biosynthesis) [Vibrio fischeri str. ES114 chromosome I]		AAA domain;Chain length determinant protein;G-rich domain on putative tyrosine kinase
PSLF89_03395	chromosome	-2.21	0.016	RL34	J	Ribosomal protein L34	50S ribosomal protein L34	LSU ribosomal protein L34P K02914 large subunit ribosomal protein L34			Ribosomal protein L34
PSLF89_05030	chromosome	-2.24	0.021	--		--	hypothetical protein
PSLF89_372	chromosome	-2.24	0.049	RL17	J	Ribosomal protein L17	50S ribosomal protein L17			Ribosomal protein L17	Ribosomal protein L17
PSLF89_2816	chromosome	-2.26	0	--	M	Opacity protein and related surface antigens	phenol degradation protein			Outer membrane protein/outer membrane enzyme PagP , beta-barrel	Outer membrane protein beta-barrel domain
PSLF89_1459	chromosome	-2.29	0.023	TSAA	V	Alkyl hydroperoxide reductase subunit AhpC (peroxiredoxin)	ahpC/TSA family protein	AhpC/TSA family antioxidant K03386 peroxiredoxin (alkyl hydroperoxide reductase subunit C) [EC:1.11.1.15]	(gi:253798492) ahpC (TBMG_01544) - alkyl hydroperoxide reductase C protein ahpC [Mycobacterium tuberculosis str. KZN 1435]	Thioredoxin-like fold	AhpC/TSA family;C-terminal domain of 1-Cys peroxiredoxin
PSLF89_2005	chromosome	-2.32	0.019	RIMM	J	Ribosomal 30S subunit maturation factor RimM required for 16S rRNA processing	16S rRNA processing protein RimM				PRC-barrel domain;RimM N-terminal domain
PSLF89_1413	chromosome	-2.34	0.013	DBH1	L	Bacterial nucleoid DNA-binding protein	DNA-binding protein HU	hupB DNA-binding protein K03530 DNA-binding protein HU-beta		DNA-binding protein HU/Integration host factor	Bacterial DNA-binding protein
PSLF89_2799	chromosome	-2.35	0.041	--		Periplasmic protein refolding chaperone Spy/CpxP family	heavy-metal resistance family protein				Heavy-metal resistance
PSLF89_3277	chromosome	-2.36	0.033	CSP4	K	Cold shock protein CspA family	cold-shock protein	Cold-shock DNA-binding domain protein K03704 cold shock protein (beta-ribbon, CspA family)		Nucleic acid-binding, OB-fold	'Cold-shock' DNA-binding domain
PSLF89_3346	chromosome	-2.36	0.012	PIP	HR	Pimeloyl-ACP methyl ester carboxylesterase	hypothetical protein	proline-specific peptidase (EC:3.4.11.5) K01259 proline iminopeptidase [EC:3.4.11.5]			Alpha/beta hydrolase family
PSLF89_05675	chromosome	-2.38	0	--		--	hypothetical protein
PSLF89_2188	chromosome	-2.38	0.037	--		--	hypothetical protein
PSLF89_2p15	pPSLF89-2	-2.39	0.01	--	R	Predicted nuclease of the RNAse H fold HicB family	hypothetical protein			Arc-type ribbon-helix-helix	HicB family
PSLF89_3113	chromosome	-2.4	0.017	--	U	Predicted component of the type VI protein secretion system	type VI secretion system-associated lipoprotein	hypothetical protein K11906 type VI secretion system protein VasD	(gi:146307344) Pmen_2319 - hypothetical protein [Pseudomonas mendocina str. ymp]		Type VI secretion lipoprotein
PSLF89_3294	chromosome	-2.42	0	EPSA	M	Periplasmic protein involved in polysaccharide export contains SLBB domain of the beta-grasp fold	hypothetical protein	wza1 polysaccharide export lipoprotein Wza K01991 polysaccharide export outer membrane protein	(gi:27364235) wza (VV1_0786) - Periplasmic protein involved in capsular polysaccharide export [Vibrio vulnificus str. CMCP6 chromosome I]		Polysaccharide biosynthesis/export protein
PSLF89_3291	chromosome	-2.44	0.041	RMLA	M	dTDP-glucose pyrophosphorylase	glucose-1-phosphate thymidylyltransferase	hypothetical protein K00973 glucose-1-phosphate thymidylyltransferase [EC:2.7.7.24]	(gi:24379858) rmlA (SMU.1461) - putative glucose-1-phosphate thymidyltransferase [Streptococcus mutans str. UA159]		Nucleotidyl transferase
PSLF89_720	chromosome	-2.45	0	ROC4	J	RNA recognition motif (RRM) domain	hypothetical protein	rbp RNA-binding protein		Nucleotide-binding, alpha-beta plait	RNA recognition motif. (a.k.a. RRM, RBD, or RNP domain)
PSLF89_855	chromosome	-2.47	0.012	--		Uncharacterized protein	hypothetical protein
PSLF89_09200	pPSLF89-4	-2.54	0	--		--	hypothetical protein	type IV conjugative transfer system pilin TraA			TraA
PSLF89_3295	chromosome	-2.6	0.038	PTP	T	Protein-tyrosine-phosphatase	hypothetical protein	protein tyrosine phosphatase K01104 protein-tyrosine phosphatase [EC:3.1.3.48]	(gi:27364232) wzb (VV1_0783) - Protein-tyrosine-phosphatase [Vibrio vulnificus str. CMCP6 chromosome I]		Low molecular weight phosphotyrosine protein phosphatase
PSLF89_2p1	pPSLF89-2	-2.61	0.016	--		--	hypothetical protein K661_02347
PSLF89_636	chromosome	-2.68	0	--		--	hypothetical protein
PSLF89_03740	chromosome	-2.71	0	PSEUDO		PSEUDO	PSEUDO
PSLF89_03545	chromosome	-2.75	0.045	--		--	hypothetical protein
PSLF89_3161	chromosome	-2.84	0.032	--		Transposase	trfA family protein				TrfA protein
PSLF89_2817	chromosome	-2.84	0	--		Opacity protein and related surface antigens	phenol degradation protein			Outer membrane protein/outer membrane enzyme PagP , beta-barrel	Outer membrane protein beta-barrel domain
PSLF89_280	chromosome	-2.84	0	--		--	hypothetical protein				Phasin protein
PSLF89_723	chromosome	-2.87	0	Y1416		SOS-response transcriptional repressor LexA (RecA-mediated autopeptidase)	hypothetical protein	HTH-type transcriptional regulator		Lambda repressor-like, DNA-binding domain	Peptidase S24-like;Cro/C1-type HTH DNA-binding domain
PSLF89_09235	pPSLF89-4	-3.14	0.038	GSA	H	Glutamate-1-semialdehyde aminotransferase	aspartate aminotransferase family protein	glutamate-1-semialdehyde 2,1-aminomutase K01845 glutamate-1-semialdehyde 2,1-aminomutase [EC:5.4.3.8]	(gi:113461372) hemL (HS_1229) - glutamate-1-semialdehyde aminotransferase [Haemophilus somnus str. 129PT]	Pyridoxal phosphate-dependent transferase, major region, subdomain 2	Aminotransferase class-III
PSLF89_235	chromosome	-3.37	0	RL31	J	Ribosomal protein L31	50S ribosomal protein L31	rpmE 50S ribosomal protein L31 K02909 large subunit ribosomal protein L31			Ribosomal protein L31
PSLF89_07400	chromosome	-3.79	0.025	--		--	hypothetical protein
PSLF89_2654	chromosome	-4.05	0	--		--	hypothetical protein				AT hook motif;AT hook motif
PSLF89_751	chromosome	-4.5	0	--		--	hypothetical protein	putative N-acetylglucosamine-6-phosphate deacetylase
PSLF89_34	chromosome	-5.02	0	HAPT	O	Zn-dependent metalloprotease	peptidase M4 family protein		(gi:37677125) hap/vvp (VVA1465) - Zinc metalloprotease, vibriolysin [Vibrio vulnificus str. YJ016 chromosome II]	Peptidase M4 domain	Fungalysin/Thermolysin Propeptide Motif;Thermolysin metallopeptidase, catalytic domain;Thermolysin metallopeptidase, alpha-helical domain
