# Supplementary material for: Transcriptomic Changes of Piscirickettsia salmonis During Intracellular Growth in a Salmon Macrophage-Like Cell Line
Source: PubMed Central journal article supplement (PMC6964531; doi:10.3389/fcimb.2019.00426), 2020-01-09
Supplement: Table_1.pdf [file Table_1.pdf]

**Supplementary Table 1.** Correlation between stationary phase bacterial cultures, optical density measurements, bacterial cell number and bacterial viability. *P. salmonis* cultures grown for 2 or 4 days were used to measure optical density at 600 nm (OD<sub>600</sub>), bacterial cell numbers were counted with a Petroff-Hausser chamber, and bacteria viability was evaluated with the most-probable number (MPN) method. The average of four independent experiments with their respective standard deviation is shown.

| Days of culture | OD <sub>600</sub> | Bacterial cell number        | MPN                          |
|-----------------|-------------------|------------------------------|------------------------------|
| 4               | 1.26 ±0.06        | 5.78 ±0.25 x 10 <sup>9</sup> | 1.03 ±0.33 x 10 <sup>7</sup> |
| 2               | 0.57±0.08         | 1.70 ±0.12 x 10 <sup>9</sup> | 4.90 ±0.31 x 10 <sup>6</sup> |
