# Supplementary material for: Transcriptomic Changes of Piscirickettsia salmonis During Intracellular Growth in a Salmon Macrophage-Like Cell Line
Source: PubMed Central journal article supplement (PMC6964531; doi:10.3389/fcimb.2019.00426), 2020-01-09
Supplement: Table_2.pdf [file Table_2.pdf]

**Supplementary Table 2:** List of genes and primer sequences used in this study.

| <b>Locus</b> | <b>Gene annotation</b>                        | <b>Primer sequence 5' → 3'</b> |                      |
|--------------|-----------------------------------------------|--------------------------------|----------------------|
| PSLF89_3276  | Alternative sigma factor RpoS                 | Forward                        | CAGGAAGTCCAGATGCAACA |
|              |                                               | Reverse                        | CTTTCTATCATCCGCCGTCT |
| PSLF89_2050  | Alternative sigma factor RpoS                 | Forward                        | CAACCTTGATGCGACAGAGA |
|              |                                               | Reverse                        | ACGGCGAGCAAAAATATCAC |
| PSLF89_1673  | Histidine kinase GacS                         | Forward                        | AAGCAGGTGCTGCAGTTAT  |
|              |                                               | Reverse                        | CTGCGCAACATCAGGACTAA |
| PSLF89_3272  | Histidine kinase KdpD                         | Forward                        | CCGTTAGCACGTCTTGGTTT |
|              |                                               | Reverse                        | TTTGACAAAACGCTCAGCAC |
| PSLF89_2952  | Peptidyl-prolyl cis-trans isomerase Mip       | Forward                        | TGGTGTAGTTCGCCATTTGA |
|              |                                               | Reverse                        | ATAAGCAAGCTTGGCTGGAA |
| PSLF89_1p169 | Phosphatidylserine PLD                        | Forward                        | ATGTGCAATGGCTATGCTGA |
|              |                                               | Reverse                        | ATCAGGCCAACTTTCCAATG |
| PSLF89_3295  | Protein-tyrosine-phosphatase                  | Forward                        | TTAGCGCTGAGCTGATCAAA |
|              |                                               | Reverse                        | CTTCATTACGCCACCTACCC |
| PSLF89_34    | Zn-dependent metalloprotease HpaT             | Forward                        | AGAAAATGGTGAGCCAATGC |
|              |                                               | Reverse                        | GACCTGCGACATCCAAAGAT |
| PSLF89_2849  | (p)ppGpp synthase/hydrolase Spot              | Forward                        | ATGCTGGACGCGGTATTATC |
|              |                                               | Reverse                        | GACATTTCCACACGAACACG |
| PSLF89_1546  | (p)ppGpp synthase/hydrolase RelA              | Forward                        | CCAAGTGGTCTGGCAATTTT |
|              |                                               | Reverse                        | CCTCAGTGCGTAAAACGTGA |
| PSLF89_1160  | Glucose-6-phosphate isomerase                 | Forward                        | CGGCACAAATCAATCATCAC |
|              |                                               | Reverse                        | ACCCAGTCCCACATTGGTAA |
| PSLF89_1860  | Gluconate kinase                              | Forward                        | ATCCAGCGCTACCTAAAGCA |
|              |                                               | Reverse                        | GTTGCAATTGCGCTGAAGTA |
| PSLF89_1979  | Exoribonuclease R Rnr                         | Forward                        | TCGCGTTGTTGAGATTCTTG |
|              |                                               | Reverse                        | CTTGTTCTTGCACAGCCTCA |
| PSLF89_839   | Selenocysteine lyase/Cysteine desulfurase Csd | Forward                        | CATGTTGGCATTGCTATGG  |
|              |                                               | Reverse                        | CGCTGCAATCATACTGCTA  |
| PSLF89_2324  | 3'5'-cyclic AMP phosphodiesterase CpdA        | Forward                        | CTACCCATGGTCGCTTTGTT |

|             |                                            |         |                       |
|-------------|--------------------------------------------|---------|-----------------------|
|             |                                            | Reverse | TTGGGTCAATCTGCATGGTA  |
| PSLF89_386  | Disulfide bond formation protein DsbB      | Forward | CTGCAACACTACCCCTGTT   |
|             |                                            | Reverse | CCAGGTGGCTAAGCTGATGT  |
| PSLF89_1195 | Transcriptional accessory protein Tex/SPT6 | Forward | CCTTGAAGGGGTAGTCACCA  |
|             |                                            | Reverse | ATGTCACCCGCTTTAACGAC  |
| PSLF89_2576 | DNA-binding response regulator QseB        | Forward | GAGAGCGAGCCTGTCAATCT  |
|             |                                            | Reverse | CAACCGTAGAGGGATTGCAT  |
| PSLF89_913  | Stringent starvation protein B SspB        | Forward | GGGTTTGGTGGTGTTTTACG  |
|             |                                            | Reverse | GGGCAATATCACGACCATCT  |
| PSLF89_609  | DotC                                       | Forward | CACCTCCTACTTGGCGTGAT  |
|             |                                            | Reverse | GCCCTTCGGTCAACAATTTA  |
| PSLF89_1866 | DotH                                       | Forward | CCGTGCAGGTCTGGTCTTAT  |
|             |                                            | Reverse | AGAAGGCGTTGCTGTCAACT  |
| PSLF89_1867 | DotG                                       | Forward | ATGCCAAATTGTTGGGTAGC  |
|             |                                            | Reverse | TTTTGTGCTGTTGTGGCATT  |
| PSLF89_1868 | DotF                                       | Forward | AAGGCCGATGTTGCATTATT  |
|             |                                            | Reverse | GCCTTTCGCTGACTTACTGC  |
| PSLF89_1869 | DotD                                       | Forward | GGCAACGGGGTTTTATTTTT  |
|             |                                            | Reverse | TCTCCGCTAACATCACCACA  |
| PSLF89_1871 | DotD                                       | Forward | CGTTCAACAAACAGGGACT   |
|             |                                            | Reverse | CCCACAGCCTTTGCAATATC  |
| PSLF89_1873 | DotB                                       | Forward | CAGTCGTGAGCCAAAGTGAA  |
|             |                                            | Reverse | ATAACCGCCTCAAGTGTGG   |
| PSLF89_1874 | IcmT                                       | Forward | GCTTGATGCACGTGTCTGTT  |
|             |                                            | Reverse | TCGCGCAGGACAATAAAAA   |
| PSLF89_1875 | DotL                                       | Forward | TTCAATGTGGTCATCGCCTA  |
|             |                                            | Reverse | TTTACCACTCCGGTTGAGC   |
| PSLF89_1877 | DotM                                       | Forward | TCGACGACCCATGATATGAA  |
|             |                                            | Reverse | TTTCTTACCAACCCAAACC   |
| PSLF89_1879 | IcmW                                       | Forward | CAACAAAGGTTGCCGAGGTA  |
|             |                                            | Reverse | TGAGCTGATGCAGCAAGTAAA |
| PSLF89_1880 | DotO                                       | Forward | GATATTGGGCCTTCAAGCAA  |
|             |                                            | Reverse | GCCCCTAACTGCGTATCAA   |
| PSLF89_1884 | DotI                                       | Forward | ATGGCTGGGAGCAGTATTTG  |

|              |                                                       |         |                       |
|--------------|-------------------------------------------------------|---------|-----------------------|
|              |                                                       | Reverse | TTTGAGTATCTCGCGAAGCA  |
| PSLF89_3032  | Glycosyltransferase WaaE                              | Forward | GTGAAGGTTTCGGCGTATGT  |
|              |                                                       | Reverse | CCAGAATCCGCGACAATAAT  |
| PSLF89_3128  | LPS assembly outer membrane protein LptD              | Forward | ACGATCATGCCCACTGTA    |
|              |                                                       | Reverse | GTTTGGCGTAAATTGCGTTT  |
| PSLF89_2434  | Outer membrane protein OmpA                           | Forward | TTCACCTACAGTGGCAGCAG  |
|              |                                                       | Reverse | CCATTGTCTGAACCCATATCC |
| PSLF89_1754  | Predicted arabinose efflux Bcr                        | Forward | TGACTGCGGAGAGAGGTTTT  |
|              |                                                       | Reverse | AGCCACCCTTATCAAACACG  |
| PSLF89_908   | Fe <sup>2+</sup> transport system protein B FeoB      | Forward | ATGCGGCGAACTTAGAAAGA  |
|              |                                                       | Reverse | GATCGGTGCCTTGGTTTTTA  |
| PSLF89_1995  | Periplasmic protein TonB                              | Forward | CATAAAGGAACGCAACGTGA  |
|              |                                                       | Reverse | TTCAGCATTTGTCTGAACAGC |
| PSLF89_1992  | Biopolymer transport protein ExbB/TolQ                | Forward | GGGCACCATTAAACATCCAG  |
|              |                                                       | Reverse | AAGGACTGTGCCCAACAAAC  |
| PSLF89_1p227 | Uncharacterized protein contains pentapeptide repeats | Forward | TGGGTGGAATCTTGAAGGAG  |
|              |                                                       | Reverse | TTTTTCGCAACAGTGCCTAA  |
| PSLF89_1876  | Hypothetical protein                                  | Forward | CACGTATGCCAGTTCGATGT  |
|              |                                                       | Reverse | AGCCGATTCGTAAGAGCAAA  |
| PSLF89_1881  | Hypothetical protein                                  | Forward | CTGTGATTTCAAGCGTGAGC  |
|              |                                                       | Reverse | TGACTGCGGAGAGAGGTTTT  |
| PSLF89_1120  | Hypothetical protein                                  | Forward | GTGAATGGATGTCGGGCTAT  |
|              |                                                       | Reverse | AGCCTTCAGTCCAAGCGTTA  |
| PSLF89_1p229 | Hypothetical protein                                  | Forward | TGAAGACCGTGGATACACACA |
|              |                                                       | Reverse | GGGAAGAGGTTGAAGAGTCG  |
| PSLF89_2654  | Hypothetical protein                                  | Forward | CGGTCGTCCAAAACCTCCTA  |
|              |                                                       | Reverse | TTTTCAAAGCAGAACGAGCA  |
| PSLF89_751   | Hypothetical protein                                  | Forward | TATGCCTACACCAGGGCATT  |
|              |                                                       | Reverse | AAGTTTCGCGGCATATCATT  |
| PSLF89_08290 | Hypothetical protein                                  | Forward | CGCGATTGTTAGGACCTGTT  |
|              |                                                       | Reverse | AATGGGGAATGATACGCACT  |
