# Supplementary material for: Transcriptomic Changes of Piscirickettsia salmonis During Intracellular Growth in a Salmon Macrophage-Like Cell Line
Source: PubMed Central journal article supplement (PMC6964531; doi:10.3389/fcimb.2019.00426), 2020-01-09
Supplement: Table_4.pdf [file Table_4.pdf]

**Supplementary Table 4.** Significantly enriched biological process among down-regulated genes.

| <b>Translation</b> |                  |                                              |
|--------------------|------------------|----------------------------------------------|
| <b>Locus</b>       | <b>Gene name</b> | <b>Description</b>                           |
| PSLF89_683         | RSMI             | 16S rRNA C1402 (ribose-2'-O) methylase RsmI  |
| PSLF89_49          | RSME             | 16S rRNA U1498 N3-methylase RsmE             |
| PSLF89_1974        | HFLX             | 50S ribosomal subunit-associated GTPase HflX |
| PSLF89_2444        | QUEC             | 7-cyano-7-deazaguanine synthase              |
| PSLF89_69          | FMT              | Methionyl-tRNA formyltransferase             |
| PSLF89_09040       |                  | mRNA-degrading endonuclease                  |
| PSLF89_68          | DEF1             | Peptide deformylase                          |
| PSLF89_277         | PNP              | Polyribonucleotide nucleotidyltransferase    |
| PSLF89_2891        | RS1              | Polyribonucleotide nucleotidyltransferase    |
| PSLF89_1761        | TGT              | Queuine/archaeosine tRNA-ribosyltransferase  |
| PSLF89_2005        | RIMM             | Ribosomal 30S subunit maturation factor RimM |
| PSLF89_358         | RL14             | Ribosomal protein L14                        |
| PSLF89_372         | RL17             | Ribosomal protein L17                        |
| PSLF89_363         | RL18             | Ribosomal protein L18                        |
| PSLF89_2007        | RL19             | Ribosomal protein L19                        |
| PSLF89_353         | RL2              | Ribosomal protein L2                         |
| PSLF89_945         | RL20             | Ribosomal protein L20                        |
| PSLF89_07680       | RL22             | Ribosomal protein L22                        |
| PSLF89_352         | RL23             | Ribosomal protein L23                        |
| PSLF89_07670       | RL24             | Ribosomal protein L24                        |
| PSLF89_3005        | RL25             | Ribosomal protein L25                        |
| PSLF89_2320        | RL27             | Ribosomal protein L27                        |
| PSLF89_350         | RL3              | Ribosomal protein L3                         |
| PSLF89_07665       | RL30             | Ribosomal protein L30/L7E                    |
| PSLF89_235         | RL31             | Ribosomal protein L31                        |
| PSLF89_207         | RL33             | Ribosomal protein L33                        |
| PSLF89_03395       | RL34             | Ribosomal protein L34                        |
| PSLF89_351         | RL4              | Ribosomal protein L4                         |
| PSLF89_359         | RL5              | Ribosomal protein L5                         |
| PSLF89_362         | RL6              | Ribosomal protein L6P/L9E                    |
| PSLF89_2633        | RL9              | Ribosomal protein L9                         |
| PSLF89_349         | RS10             | Ribosomal protein S10                        |
| PSLF89_345         | RS12             | Ribosomal protein S12                        |
| PSLF89_368         | RS13             | Ribosomal protein S13                        |
| PSLF89_360         | RS14             | Ribosomal protein S14                        |
| PSLF89_276         | RS15             | Ribosomal protein S15P/S13E                  |

|              |      |                                                                         |
|--------------|------|-------------------------------------------------------------------------|
| PSLF89_2004  | RS16 | Ribosomal protein S16                                                   |
| PSLF89_2634  | RS18 | Ribosomal protein S18                                                   |
| PSLF89_354   | RS19 | Ribosomal protein S19                                                   |
| PSLF89_1238  | RS2  | Ribosomal protein S2                                                    |
| PSLF89_984   | RS20 | Ribosomal protein S20                                                   |
| PSLF89_355   | RS3  | Ribosomal protein S3                                                    |
| PSLF89_06495 | RS6  | Ribosomal protein S6                                                    |
| PSLF89_346   | RS7  | Ribosomal protein S7                                                    |
| PSLF89_361   | RS8  | Ribosomal protein S8                                                    |
| PSLF89_911   | RS9  | Ribosomal protein S9                                                    |
| PSLF89_311   | RATA | Ribosome association toxin PasT (RatA)                                  |
| PSLF89_271   | RIMP | Ribosome maturation factor RimP                                         |
| PSLF89_1241  | RRF  | Ribosome recycling factor                                               |
| PSLF89_274   | RBFA | Ribosome-binding factor A                                               |
| PSLF89_720   | ROC4 | RNA recognition motif (RRM) domain                                      |
| PSLF89_03400 | RNPA | RNase P protein component                                               |
| PSLF89_1769  | SYS  | Seryl-tRNA synthetase                                                   |
| PSLF89_3144  | YBEY | ssRNA-specific RNase YbeY 16S rRNA maturation enzyme                    |
| PSLF89_942   | SYT  | Threonyl-tRNA synthetase                                                |
| PSLF89_347   | EFG  | Translation elongation factor EF-G a GTPase                             |
| PSLF89_1239  | EFTS | Translation elongation factor EF-Ts                                     |
| PSLF89_348   | EFTU | Translation elongation factor EF-Tu a GTPase                            |
| PSLF89_925   | EFP  | Translation elongation factor P (EF-P)                                  |
| PSLF89_04980 | IF1  | Translation initiation factor IF-1                                      |
| PSLF89_2815  | TSAB | tRNA A37 threonylcarbamoyladenosine modification protein Tsab           |
| PSLF89_1567  | TRMJ | tRNA C32U32 (ribose-2'-O)-methylase TrmJ or a related methyltransferase |
| PSLF89_705   | TRMH | tRNA G18 (ribose-2'-O)-methylase SpoU                                   |
| PSLF89_2006  | TRMD | tRNA G37 N-methylase TrmD                                               |
| PSLF89_2563  | MNMA | tRNA U34 2-thiouridine synthase                                         |
| PSLF89_275   | TRUB | tRNA U55 pseudouridine synthase                                         |
| PSLF89_385   | TRML | tRNA(Leu) C34 or U34 (ribose-2'-O)-methylase                            |
| PSLF89_947   | SYFB | tRNA-binding EMAP/Myf domain                                            |

#### tRNA modification enzymes

| Locus        | Gene name | Description                      |
|--------------|-----------|----------------------------------|
| PSLF89_69    | FMT       | methionyl-tRNA formyltransferase |
| PSLF89_07620 | TRMB      | methyltransferase                |
| PSLF89_1302  | TADA      | adenosine deaminase              |

|             |      |                                       |
|-------------|------|---------------------------------------|
| PSLF89_1761 | TGT  | queuine tRNA-ribosyltransferase       |
| PSLF89_2006 | TRMD | tRNA (guanine-N1)-methyltransferase   |
| PSLF89_2563 | MNMA | tRNA-specific 2-thiouridylase         |
| PSLF89_275  | TRUB | pseudouridine synthase                |
| PSLF89_2815 | TSAB | tRNA threonylcarbamoyladenosine       |
| PSLF89_385  | TRML | rRNA methylase                        |
| PSLF89_705  | TRMH | tRNA guanosine-2'-O-methyltransferase |

### Transcription/replication

| Locus              | Gene name | Description                                                     |
|--------------------|-----------|-----------------------------------------------------------------|
| <b>PSLF89_2848</b> | RPOZ      | DNA-directed RNA polymerase subunit K/omega                     |
| <b>PSLF89_3276</b> | RPOH      | DNA-directed RNA polymerase sigma subunit (sigma70/sigma32)     |
| <b>PSLF89_343</b>  | RPOB      | DNA-directed RNA polymerase beta subunit/140 kD subunit         |
| <b>PSLF89_2177</b> | DPO3E     | DNA polymerase III epsilon subunit or related 3'-5' exonuclease |
| <b>PSLF89_794</b>  | HOLB      | DNA polymerase III delta prime subunit                          |
| <b>PSLF89_4</b>    | GYRB      | DNA gyrase/topoisomerase IV subunit B                           |
| <b>PSLF89_2894</b> | GYRA      | DNA gyrase/topoisomerase IV subunit A                           |

### Purine/pyrimidine metabolism

| Locus       | Gene name | Description                                                 |
|-------------|-----------|-------------------------------------------------------------|
| PSLF89_1300 | GUAB      | inosine 5'-monophosphate dehydrogenase                      |
| PSLF89_1301 | GUAA      | GMP synthase                                                |
| PSLF89_1570 | NDK       | nucleoside diphosphate kinase                               |
| PSLF89_2968 | PURM      | Phosphoribosylaminoimidazole (AIR) synthetase               |
| PSLF89_3319 | PURK      | Phosphoribosylaminoimidazole carboxylase (NCAIR synthetase) |
| PSLF89_3321 | ORFM      | non-canonical purine NTP pyrophosphatase                    |
|             | DEOD      | purine nucleoside phosphorylase                             |
| PSLF89_1240 | PYRH      | UMP kinase                                                  |
| PSLF89_2141 | UDK       | uridine kinase                                              |

### Biosynthesis of ATP

| Locus       | Gene name | Description                             |
|-------------|-----------|-----------------------------------------|
| PSLF89_1026 | PGK       | 3-phosphoglycerate kinase               |
| PSLF89_1027 | KPYK2     | Pyruvate kinase                         |
| PSLF89_1028 | ALF       | Fructose/tagatose bisphosphate aldolase |
| PSLF89_2045 | ENO       | Enolase                                 |
| PSLF89_253  | TPIS      | Triosephosphate isomerase               |

|             |      |                                                                                                      |
|-------------|------|------------------------------------------------------------------------------------------------------|
| PSLF89_3189 | ODP2 | Pyruvate/2-oxoglutarate dehydrogenase complex                                                        |
| PSLF89_3382 | ATPA | FoF1-type ATP synthase alpha subunit                                                                 |
| PSLF89_3383 | ATPD | FoF1-type ATP synthase delta subunit                                                                 |
| PSLF89_3385 | ATPL | FoF1-type ATP synthase membrane subunit<br>c/Archaeal/vacuolar-type H <sup>+</sup> -ATPase subunit K |
| PSLF89_3386 | ATP6 | FoF1-type ATP synthase membrane subunit a                                                            |
| PSLF89_256  | NUOA | NADH:ubiquinone oxidoreductase subunit 3 (chain A)                                                   |
| PSLF89_258  | NUOC | NADH:ubiquinone oxidoreductase 27 kD subunit (chain<br>C)                                            |
| PSLF89_257  | NUOB | NADH:ubiquinone oxidoreductase 20 kD subunit (chain<br>B)                                            |
